# 1 **Distinct Roles of Dopamine D1 and D2 Receptor-expressing Neurons in the Nucleus**

## 2 **Accumbens for a Strategy Dependent Decision Making**

3

4 **Tadaaki Nishioka<sup>1,\*</sup>, Tom Macpherson<sup>1</sup>, Kosuke Hamaguchi<sup>2</sup> and Takatoshi Hikida<sup>1,3,\*</sup>**

5 <sup>1</sup>Laboratory for Advanced Brain Functions, Institute for Protein Research, Osaka University;

6 <sup>2</sup>Department of Biological Sciences, Graduate School of Medicine, Kyoto University;

7 <sup>3</sup>Lead Contact

8

9 \*Correspondence: [nishioka@protein.osaka-u.ac.jp](mailto:nishioka@protein.osaka-u.ac.jp) (T.N.), [hikida@protein.osaka-u.ac.jp](mailto:hikida@protein.osaka-u.ac.jp) (T.H.)

10

11

## 12 **SUMMARY**

13 To optimize decision making, animals need to execute not only a strategy to choose a good option but  
14 sometimes also one to avoid a bad option. A psychological study indicates that positive and negative  
15 information is processed in a different manner in the brain. The nucleus accumbens (NAc) contains two  
16 different types of neurons, dopamine D1 and D2 receptor-expressing neurons which are implicated in reward-  
17 based decision making and aversive learning. However, little is known about the neural mechanisms by which  
18 D1 or D2 receptor-expressing neurons in the NAc contribute to the execution of the strategy to choose a good  
19 option or one to avoid a bad option under decision making. Here, we have developed two novel visual  
20 discrimination tasks for mice to assess the strategy to choose a good option and one to avoid a bad option. By  
21 chemogenetically suppressing the subpopulation of the NAc neurons, we have shown that dopamine D2  
22 receptor-expressing neurons in the NAc selectively contribute to the strategy to avoid a bad option under  
23 reward-based decision making. Furthermore, our optogenetic and calcium imaging experiments indicate that  
24 dopamine D2 receptor-expressing neurons are activated by error choices and the activation following an error  
25 plays an important role in optimizing the strategy in the next trial. Our findings suggest that the activation of  
26 D2 receptor-expressing neurons by error choices through learning enables animals to execute the appropriate  
27 strategy.

## 28 **INTRODUCTION**

29 Even seemingly similar decisions could be mediated by different cognitive processes. For example, selecting  
30 a food for dinner could be mediated by either picking up one's favorite food or avoiding the one with a bad  
31 experience. Although selecting a better choice and avoiding a bad choice could lead to a similar choice  
32 behavior, a psychological study indicates that their underlying processes in the brain could be different  
33 (Tversky and Kahneman, 1981). A number of studies have proposed the basal ganglia circuitry is implicated in  
34 decision making (Cohen et al., 2012; Frank et al., 2004; Hamid et al., 2015; Hikida et al., 2010; Iino et al.,  
35 2020; Maia and Frank, 2011; Samejima et al., 2005; Schultz et al., 1997; Stephenson-Jones et al., 2016; Tai et  
36 al., 2012; Yagishita et al., 2014; Zalocusky et al., 2016). Dopamine has been known as an important modulator  
37 of basal ganglia functions (Ferenczi et al., 2016; Gerfen and Surmeier, 2011; Parker et al., 2018; Shen et al.,  
38 2008; Surmeier et al., 2009). The nucleus accumbens (NAc), one of the major projection targets of dopamine  
39 neurons, is known to play an important role in reward-based decision making and aversive learning (Berridge  
40 and Kringelbach, 2008; Carlezon and Thomas, 2009; Hikida et al., 2010; Iino et al., 2020; Lee, 2013; Yawata  
41 et al., 2012; Zalocusky et al., 2016). The medium spiny projection neurons (MSN) in the NAc are divided into  
42 two major subpopulations, one that expresses the dopamine D1 receptor (D1-MSN) and the other that  
43 expresses the dopamine D2 receptor (D2-MSN). Because D1 and D2 receptors have antagonistic response to  
44 dopamine, D1- and D2-MSN were thought to have different contribution to the choice behavior. Previous  
45 studies showed that D1-MSN and D2-MSN in the NAc play distinct roles in a context dependent manner  
46 (Aragona et al., 2006; Hikida et al., 2010; Lobo et al., 2010; Macpherson and Hikida, 2018; Yawata et al.,  
47 2012), however, it is not well understood how and whether different strategies, such as selecting a better  
48 choice or avoiding a bad choice, are differentially represented in these two distinct classes of neurons in NAc.

49 In this study, we have developed a pair of visual discrimination learning tasks to assess the strategy  
50 dependent decision making in mice. While in the visual discrimination-based cue-guided attendance learning  
51 (VD-Attend), mice need to acquire the strategy to choose a good option. In contrast, in the visual  
52 discrimination-based cue-guided avoidance learning (VD-Avoid), mice need to acquire the strategy to avoid a  
53 bad option. To establish the contribution of these two subpopulations in these different tasks, we  
54 chemogenetically manipulated the neuronal activities of D1-MSN or D2-MSN in the NAc while mice

55 performing the VD-Attend or VD-Avoid tasks. Moreover, we performed optogenetic manipulation to test  
56 whether the NAc contributes to the execution of the strategy in a timing-specific manner. We further  
57 performed in vivo calcium imaging with a miniature microscope to investigate the underlying neural  
58 representations of D1-MSN and D2-MSN. Our results show that the majority of D1-MSN in the NAc is  
59 recruited by correct choice and the activity of D1-MSN is important for the motivational control and keeping  
60 the same strategy. By contrast, D2-MSN in the NAc plays a selective role in executing the strategy to avoid a  
61 bad option in VD-Avoid task. Furthermore, we found that the vast majority of D2-MSN are activated by error  
62 choices and the activation of D2-MSN after error is necessary for optimizing the strategy in next trial. Our  
63 findings suggest that the activation of D2-MSN by error choices through learning enables animals to execute  
64 the appropriate strategy.

65

66

## 67 **RESULTS**

### 68 **Mice Can Acquire Both the Strategy to Choose a Good Option and One to Avoid a Bad Option**

69 To study the neural mechanisms underlying the strategy to choose a good option and one to avoid a bad option,  
70 we designed two novel visual discrimination learning tasks, VD-Attend and VD-Avoid task on a touchscreen-  
71 based operant chamber (**Figure 1A**). In these tasks, two visual cues were presented on a touchscreen after trial  
72 initiation (**Figure 1B**). If mice responded to a correct cue, the reward was delivered in the magazine. If mice  
73 responded to an incorrect cue, they were punished with a 5-sec time-out. In the VD-Attend task, while the  
74 visual cue A (e.g. marble) was presented as a correct cue in every trial, a random image was presented as an  
75 incorrect cue. Therefore, mice were required to execute a strategy to choose cue A in order to obtain a reward  
76 (**Figure 1A**). By contrast, in the VD-Avoid task, the visual cue B (e.g. fan) was presented as an incorrect cue  
77 and a random image was presented as a correct cue. Therefore, mice cannot directly learn the correct cue, but  
78 instead, mice could obtain a reward by avoiding the cue B (**Figure 1A**). Next, we trained C57BL/6J mice to  
79 the VD-Attend or VD-Avoid task and confirmed that mice can perform both tasks well within a few weeks of  
80 training (**Figure 1C**). The number of sessions and total errors to criterion in the VD-Avoid task were larger  
81 than that in the VD-Attend task (**Figure 1D and 1E**), suggesting that acquisition of the strategy to avoid a bad

82 option is more difficult than that to choose a good option. However, the performances measured by the  
83 percentage of correct choice were comparable in the VD-Attend and VD-Avoid tasks across sessions (**Figure**  
84 **1F and 1G**). Correct latency and reward latency were also comparable in the VD-Attend and VD-Avoid  
85 (**Figure 1H and 1I**). A number of studies have reported the phenomenon of post-error slowing in which the  
86 subjects tend to slow down the response after an error trial (Houtman et al., 2012; Notebaert et al., 2009;  
87 Rabbitt and Rodgers, 1977; Ruitenberg et al., 2014). We also tested whether the recent history on the previous  
88 trial affected the response latency on the current trial. We found that mice tended to respond slowly on the next  
89 trial after making an error response in the VD-Avoid task (**Figure S1**), suggesting that response latencies were  
90 modulated by recent history. Together, these data show that mice can acquire both strategies of attending and  
91 avoiding specific visual cues in the touchscreen-based operant tasks, which provide a framework for studying  
92 the neural mechanisms underlying two different forms of strategies.

93

#### 94 **Chemogenetic Suppression of D2-MSN in the NAc Selectively Impair the Ability to Execute the Strategy** 95 **to Avoid a Bad Option**

96 Given that dopaminergic medication impaired the ability to avoid a bad option option (Frank et al., 2004,  
97 2007), and the NAc, one of the major targets of the dopamine neurons, plays an important role in decision  
98 making (Berridge and Kringelbach, 2008; Carlezon and Thomas, 2009; Hikida et al., 2010; Iino et al., 2020;  
99 Lee, 2013; Yawata et al., 2012; Zalocusky et al., 2016), we first investigated whether D1-MSN and D2-MSN  
100 in the NAc contribute to the performance in VD-Attend and VD-Avoid tasks. We bilaterally injected an adeno-  
101 associated virus (AAV) carrying inhibitory designer receptor exclusively activated by a designer drug  
102 (iDREADD, hM4Di) fused to mCherry (Armbruster et al., 2007) in a Cre dependent manner into the NAc of  
103 D1-Cre or D2-Cre mice (**Figure 2A**). The hM4Di can robustly suppress the neuronal activities via cell  
104 signaling when an artificial ligand clozapine-N-oxide (CNO) is administered (Wulff and Arenkiel, 2012). To  
105 test whether D1-MSN or D2-MSN in the NAc is involved in executing the strategy, we trained mice  
106 expressing hM4Di-mCherry in D1-MSN or D2-MSN of the NAc to the VD-Attend or VD-Avoid task (**Figure**  
107 **2A**). After mice were well-trained, we intraperitoneally administered CNO at the session 4 and 6 in probe test  
108 (**Figure 2A**). In this study, we mainly targeted the core region of the NAc because recent studies indicate that

109 the dopamine neurons are heterogeneous and the dopamine neurons projecting to the core but not shell region  
110 encode the reward prediction error information (Iino et al., 2020; Jong et al., 2019; Parker et al., 2016;  
111 Roitman et al., 2008). We histologically confirmed that hM4Di-mCherry expression in the injection site were  
112 mainly restricted to the NAc (**Figure 2B**). Moreover, in D1-Cre mice, hM4Di-mCherry-positive axon  
113 terminals were observed in the ventral pallidum (VP) and substantia nigra pars reticulata (SNr), while in D2-  
114 Cre mice, hM4Di-mCherry-positive axon terminals were observed only in the VP but not SNr (**Figure S2**),  
115 which are consistent with the canonical targets of D1-MSN or D2-MSN in the NAc (Lu et al., 1997; Zhou et  
116 al., 2003). These data demonstrates that the viral transduction allowed us to selectively express hM4Di-  
117 mCherry in D1-MSN or D2-MSN in the NAc. A previous study also shows that CNO can functionally  
118 suppress the neuronal activity of the NAc (Luo et al., 2018). Next, we examined how chemogenetic  
119 suppression of D1-MSN or D2-MSN in the NAc via CNO influenced the performance of the VD-Attend or  
120 VD-Avoid task across sessions (**Figure 2C**). Chemogenetic suppression of D1-MSN in the NAc reversibly  
121 decreased the performance of both the VD-Attend and VD-Avoid task (**Figure 2D**). Interestingly,  
122 chemogenetic suppression of D2-MSN in the NAc selectively decreased the performance of the VD-Avoid but  
123 not VD-Attend task (**Figure 2D**), suggesting that the neuronal activities of D2-MSN in the NAc is necessary  
124 for avoiding a bad option but not choosing a good option under decision. The extent of decreased performance  
125 in D1-Cre mice was comparable to that in D2-Cre mice in the VD-Avoid task (**Figure 2E**). Moreover, we  
126 confirmed that CNO itself did not affect the performance of the VD-Attend or VD-Avoid task though CNO  
127 treatment slightly improved the performance of the VD-Avoid task in control group (**Figure 2D**). Considering  
128 that the NAc plays an important role in motivational control (Aberman et al., 1998; Berridge, 2007; Delgado,  
129 2007; Gallo et al., 2018; Roitman et al., 2005; Salamone et al., 2007; Schultz et al., 1992) and that a decrease  
130 in the performance in the reward-based decision making could be associated with motivation deficits, we  
131 analyzed the effect of chemogenetic manipulation on motivation. We found that chemogenetic suppression of  
132 D1-MSN in the NAc decreased the number of earned rewards and increased reward latency, both of which  
133 indicated decreased motivation (**Figure 2F and 2G**). On the other hand, chemogenetic suppression of D2-  
134 MSN in the NAc did not affect the motivation indices (**Figure 2F and 2G**), suggesting that a decrease in  
135 performance of the VD-Avoid task are attributed to the impaired ability to avoid a bad option. Furthermore, we

136 analyzed whether the outcome of the previous trial affected the performance of the current trial. The  
137 chemogenetic suppression of D1-MSN in the NAc resulted in a decrease of performance following a correct  
138 trial (**Figure S3A and S3B**), suggesting that D1-MSN in the NAc plays an important role in consecutively  
139 making a correct choice. On the other hand, we could not detect the effect of the recent history on the  
140 behavioral performance in D2-Cre or control group (**Figure S3C-S3F**). Collectively, our data indicate that D1-  
141 MSN and D2-MSN in the NAc contribute to the choice behavior differently; D1-MSN contributes to both the  
142 VD-Attend and VD-Avoid tasks, and D2-MSN selectively involved in the VD-avoid task.

143

144 **Optogenetic Inhibition of D2-MSN in the NAc during Outcome Period on the Error Trial Is Sufficient to**  
145 **Impair the Ability to Execute the Strategy to Avoid a Bad Option on the Next Trial**

146 We have shown that D2-MSN in the NAc causally contributes to the strategy to avoid a bad option (**Figure 2**).  
147 To identify a critical time window in which D2-MSN exerts influence on the choice behavior, we  
148 optogenetically inhibited the neuronal activity of D2-MSN in the NAc in a time-locked manner. We first  
149 bilaterally expressed the light-driven outward proton pump, archaerhodopsin (ArchT) fused to tdTomato (Han  
150 et al., 2011) in D2-MSN in the NAc and implanted optic fibers above the NAc (**Figure 3A, 3B, and S4**). The  
151 optical stimulation can suppress the activities of ArchT expressing neurons (Kang et al., 2017). We separated  
152 the task into 3 time periods (ITI period; the last 5 sec of an inter-trial interval (ITI) to trial initiation. Cue  
153 period; the time from trial initiation to the response. Outcome period; 5 sec after the response, **Figure 3C**) to  
154 tested whether D2-MSN activity in different time periods have different effects on the performance of the VD-  
155 Avoid task. We found that optogenetic inhibition of D2-MSN in the NAc during Outcome period selectively  
156 decreased the performance but not in ITI or Cue period stimulation trials (**Figure 3D-3F**). Furthermore, a  
157 decrease in performance by optogenetic inhibition during Outcome period was observed on the next trial after  
158 making an error choice on the previous trial but not after making a correct choice (**Figure 3G and 3H**). The  
159 recent history-dependent decline in the performance was observed only when optogenetic inhibition was  
160 applied to Outcome period but not ITI or Cue period (**Figure S5A-S5D**). These results suggest that the  
161 neuronal activity of D2-MSN in the NAc immediately after making an error response plays an important role  
162 in avoiding a bad option on the next trial. In addition, since response latencies were modulated by recent

163 history (**Figure S1**) and optogenetic inhibition of D2-MSN in the NAc affect the performance in the VD-  
164 Avoid task in a history dependent manner (**Figure 3G**), we analyzed whether optogenetic inhibition of D2-  
165 MSN in the NAc affected response latencies in the VD-Avoid task. Interestingly, optogenetic inhibition of D2-  
166 MSN in the NAc sped up the response on the current trial after having committed an error on the previous trial  
167 (**Figure S6A-S6F**), suggesting that the neuronal activation of D2-MSN in the NAc immediately after making  
168 an error response contributes to post-error slowing. Taken together, optogenetic inhibition of D2-MSN in the  
169 NAc during Outcome period in the error trial selectively decreases the behavioral performance on the next trial.  
170

### 171 **D2-MSN in the NAc Are Dominantly Activated after Making an Error Response than D1-MSN**

172 We have shown that inhibition of D2-MSN in the NAc during Outcome period was sufficient to decrease the  
173 behavioral performance in the VD-Avoid task (**Figure 3**). Next, we examined whether D2-MSNs are activated  
174 by error response and how the neuronal activity differs between D1-MSN and D2-MSN. To investigate the  
175 activity of D1-MSN or D2-MSN in the NAc, we performed calcium imaging of D1-MSN or D2-MSN in the  
176 NAc at a single-cell resolution using a miniature microscope. We injected AAV carrying a fluorescent calcium  
177 indicator, jGCaMP7f (Dana et al., 2019) in a Cre dependent manner into the NAc of D1-Cre or D2-Cre mice  
178 and implanted a gradient-index (GRIN) lens above the NAc (**Figure 4A, 4B, and S7**). Using a constrained  
179 non-negative matrix factorization method to the microendoscopic images (CNMFe; Zhou et al., 2018), we  
180 extracted the calcium activities from individual D1-MSNs or D2-MSNs from freely moving mice performing  
181 the VD-Avoid task (**Figure 4C and 4D; Movies S1 and S2**). We identified 266 cells from D1-Cre mice and  
182 194 cells from D2-Cre mice, respectively. Some of cells were reliably activated after making an error response  
183 but not a correct response (**Figure 4E**). Others showed a transient activation following a correct response  
184 (**Figure 4F**). We have shown that D1-MSN and D2-MSN contribute to the behavioral performance in a recent  
185 history dependent manner (**Figure S3A, S3B, and 4G**). Therefore, we focused on the difference in the calcium  
186 activity between correct and error trials and calculated the area under the curve receiver operating  
187 characteristic (auROC) of z-scored activities in the error and correct trials. To classify the calcium activities of  
188 D1-MSN and D2-MSN in the NAc, we performed the principal component analysis (**Figure 4G**). In D2-MSN,  
189 60% of identified cells (117 out of 194 cells) were classified as Type I, which showed sustained activation

190 after making an error choice while 40% of identified cells (77 out of 194 cells) were classified as Type II,  
191 which were activated in a correct trial (**Figure 4H**). In D1-MSN, 44% of identified cells (116 out of 266 cells)  
192 were classified as Type I while 56% of identified cells (150 out of 266 cells) were classified as Type II (**Figure**  
193 **4H**). Moreover, to investigate when D1-MSN or D2-MSN in the NAc showed statistically significant calcium  
194 activity between correct and error trials, we defined cell with statistically significant activity as responsive  
195 cells and calculated their proportions (**Figure 4I and S8**). As a result, we found that the proportion of  
196 responsive cells statistically increased in Outcome period compared to ITI and Cue period (**Figure 4J**). This  
197 result was consistent with the previous results by optogenetics in which inhibition of D2-MSN during  
198 Outcome period selectively decreased the behavioral performance (**Figure 3D-3F**). Furthermore, we analyzed  
199 the calcium dynamics of cells with statistically significant activity during Outcome period (**Figure 4K and S9**)  
200 and found that the proportion of Type I (Error Type) in D2-MSN was more dominant than D1-MSN (**Figure**  
201 **4L**). These results were also consistent with the results by optogenetics in which inhibition of D2-MSN in the  
202 error trials decreased the performance on the next trial (**Figure 3G and 3H**). Although Type I and Type II  
203 were intermingled in both D1-MSN and D2-MSN (**Figure S10A-S10D**), D2-MSNs of the same valence  
204 existed closer to each other than those of opposite valence, suggesting that D2-MSN but not D1-MSN formed  
205 spatial clustering of cells with similar functional properties (**Figure S10E and S10F**). Collectively, the  
206 majority of D2-MSNs in the NAc was activated by error choice in the VD-Avoid task, corroborating our  
207 hypothesis that neuronal activation of D2-MSN in the NAc by error detection plays an important role in  
208 avoiding a bad option. On the other hand, the majority of D1-MSNs in the NAc was activated by correct  
209 choice. Given that inhibition of D1-MSN in the NAc decreased the performance on the next trial after making  
210 a correct choice, it could be that neuronal activation of D1-MSN in the NAc contributes to keep same strategy  
211 with confidence.

212

### 213 **Neuronal Activation of D2-MSN in the NAc by Error Choice Were Acquired through Learning in the** 214 **VD-Avoid Task**

215 To investigate if error-correct selective activity during the Outcome period depends on the learning, we next  
216 examined whether neuronal activation of MSN in the NAc by error or correct choices in the VD-Avoid task



217 depended on the learning. To investigate how the neuronal activity of D1-MSN or D2-MSN in the NAc  
218 changed through learning at a single-cell level, we tracked the same neurons before and after learning (**Figure**  
219 **5A**) with a cell registration methods (Sheintuch et al., 2017). As the training progressed, D1-Cre and D2-Cre  
220 mice similarly improved their performances in the VD-Avoid task (**Figure S11**). In the criterion session, we  
221 imaged the activities of 460 cells (D1-Cre, 266 cells; D2-Cre, 194 cells) and identified 239 neuron pairs (D1-  
222 Cre, 103 pairs; D2-Cre, 136 pairs) from these mice. A subset of cells activated by error choices (Type I) in the  
223 criterion session (expert) had a weak response to error choices in the first session (novice) in the VD-Avoid  
224 task (**Figure 5B**). Similarly, we also found that some of the cells activated by correct choices (Type II) in  
225 expert mice had a weak response to correct choices in novice mice in the VD-Avoid task (**Figure 5C**). Next, to  
226 investigate the change in the calcium activity against error or correct choices through learning, we analyzed the  
227 difference in the calcium activities in novice and expert mice (**Figure 5D**). By tracking the same neurons  
228 through training, we found that the activity of D2-MSN in expert mice positively correlated with that in novice  
229 mice, whereas we could not detect any correlation in D1-MSN imaged in the VD-Avoid task (**Figure 5D**).  
230 Furthermore, we classified the type of neuron pairs and quantified the proportion of cells that become  
231 responsive Type I or Type II from non-responsive in D1-Cre or D2-Cre mice. The results showed that the  
232 majority (13.6%) of D1-MSN acquired the correct choice selectivity after learning (**Figure 5E and S12**). In  
233 contrast, the majority (16.8%) of D2-MSN acquired the error choice selectivity after learning (**Figure 5E and**  
234 **S12**). Moreover, we revealed that the proportion of cells that become responsive Type I from non-responsive  
235 were significantly higher in D2-MSN than D1-MSN (**Figure 5F**). In contrast, the proportion of cells that  
236 become responsive Type II from non-responsive were significantly higher in D1-MSN than D2-MSN (**Figure**  
237 **5F**). These results indicate that the neuronal activation of D1-MSN and D2-MSN by outcome depends on the  
238 learning. The acquisition of responsiveness by learning of these neurons is likely to contribute to the high  
239 performance in the VD-Avoid task.

240

241

242 **DISCUSSION**

243 Although dopamine signaling plays an important role in strategy-dependent decision making (Frank et al.,  
244 2004, 2007), it has been poorly understood how the neural substrates targeted by dopamine contribute to  
245 reinforcement learning and execution of the strategy under the decision. Here we have established novel visual  
246 discrimination tasks in mice to assess the neural mechanisms underlying the strategy-dependent decision  
247 making. Our data show that neuronal activation of D2-MSN in the NAc by error choices is essential for  
248 executing the strategy to avoid a bad option. Previous studies have shown that when the dopamine  
249 concentration in a brain is increased by L-dopa treatment, the subjects cannot avoid a bad option but still can  
250 choose a good choice (Frank et al., 2004, 2007). L-dopa treatment can decrease the excitability of D2-MSN  
251 because the dopamine D2 receptor is coupled to Gi signaling (Cepeda et al., 1993; Stoof and Keibarian, 1984;  
252 Surmeier et al., 2007). Given that our chemogenetic and optogenetic suppression of D2-MSN in the NAc  
253 disrupted the strategy to avoid a bad option but not that to choose a good option, we concluded that  
254 hypoactivity of D2-MSN in the NAc caused the subjects not to execute the strategy to avoid a bad option.  
255 Although overactivation of D1-MSN in the striatum including the NAc could also contribute to disability to  
256 avoid a bad option directly or indirectly (e.g. via local D2-MSN to D1-MSN synapse; Matamales et al., 2020),  
257 our study demonstrates downstream neural mechanisms of dopamine signaling by which the neuronal activity  
258 of D2-MSN in the NAc selectively contributes to avoid a bad option but not choose a good option.

259 Our calcium imaging data suggest that as individual D2-MSNs are reliably activated by error choices,  
260 mice efficiently avoid a bad option. Although individual D1-MSNs lost the response selectivity through  
261 learning (**Figure 5D**), given that chemogenetic suppression of D1-MSN decreased the performance in the VD-  
262 Avoid task as well as the VD-Attend task (**Figure 2D**) and some D1-MSNs were recruited by correct choices  
263 after learning (**Figure 5E and 5F**), we expect that the neuronal activity of D1-MSN also contributes to the  
264 performance in the VD-Avoid task. Our calcium imaging data also showed that the activity of D2-MSN in  
265 expert mice positively correlated with that in novice mice, whereas we could not detect any correlation in D1-  
266 MSN imaged in the VD-Avoid task. Given that the VD-Avoid task required mice to avoid a specific cue (e.g.  
267 flag) associated with negative outcome (e.g. omission), the neuronal activation of D2-MSN in the NAc by  
268 error choices plays an important role in avoiding a bad option, and the neuronal activity of D2-MSN had a  
269 positive correlation between before and after learning, individual D2-MSNs in the NAc could encode the value

270 information associated with the specific cue, in particular negative value. Moreover, given that D1-MSN plays  
271 an important role in a reward learning and a reward approaching behavior (Hikida et al., 2010; Kravitz et al.,  
272 2012; Macpherson and Hikida, 2018; Shin et al., 2018; Tai et al., 2012), the neuronal activation of D1-MSN by  
273 positive outcome (e.g. reward) can contribute to choose the cue associated with positive outcome. The reason  
274 we could not find any correlation in D1-MSN was attributed to the property of the VD-Avoid in which mice  
275 could not associate the specific cue with the positive outcome because the cue associated with reward changed  
276 in every trial in the VD-Avoid task.

277           Previous studies indicate that D2-MSN plays an important role in aversive learning (Danjo et al.,  
278 2014; Hikida et al., 2010). However, classical paradigms trained mice not to take any action against the cue or  
279 the context associated with an aversive stimulus. Therefore, it was difficult to distinguish the motor component  
280 from an aversive information processing because D2-MSN is also involved in action and locomotion  
281 (Bakhurin et al., 2020; Kravitz et al., 2010; Tecuapetla et al., 2016; Tsutsui-Kimura et al., 2017a; Yao et al.,  
282 2021). Furthermore, although an electric shock or an air puff was often used as an aversive stimulus, those  
283 stimuli are innately aversive and could be different from a negative prediction error (e.g. omission). Because  
284 our paradigm shares the other components from the strategy, we think that it is easier to extract the component  
285 of the strategy. Our previous data showed that perturbation of the D2 receptor signalling by knockout of D2L  
286 interfered with visual discrimination learning (Morita et al., 2016). By combining the previous study and the  
287 current study, we suggest that mice simultaneously learn to choose a cue associated with a reward and to avoid  
288 a cue not associated with a reward in classical discrimination learning.

289           It is known that dopamine neurons encode a reward prediction error and the firing rate of dopamine  
290 neurons decreases (e.g. dopamine dip) when the subjects did not receive the expected reward (Schultz et al.,  
291 1997). We expect that the dopamine dip by a reward omission contributes to the strategy to avoid a bad option.  
292 Activation of D2-MSN by disinhibition of D2 receptor could contribute to suppressing the action associated  
293 with a negative outcome under discrimination learning. Interestingly, dopamine neurons are heterogeneous,  
294 and reward prediction error activity can be observed in the NAcCore but not NAcShell (Iino et al., 2020; Jong  
295 et al., 2019). We mainly targeted the NAcCore and revealed that chemogenetic and optogenetic suppression of  
296 D2-MSN in the NAcCore is sufficient to decrease the performance in the VD-Avoid task. Although we cannot

297 exclude the possibility that the NAcShell also contributes to the strategy to avoid a bad option, we revealed  
298 that at least D2-MSN in the NAcCore plays an important role in the strategy to avoid a bad option. Moreover,  
299 it is reported that the dorsomedial striatum (DMS) plays an important role in reinforcement learning (Kravitz et  
300 al., 2012; Tai et al., 2012) and electrophysiological recording showed that D1-MSN in the DMS preferentially  
301 encodes positive prediction error and D2-MSN encodes negative prediction error (Shin et al., 2018). Therefore,  
302 the DMS could also contribute to the strategy. In the future, we need to investigate how differently the  
303 NAcCore, NAcShell, and DMS contribute to the execution of the strategy under decision.

304           Disability to execute the strategy to avoid a bad option could be associated with risk-taking behaviors.  
305 A previous study showed D2-MSN activity in the NAc is important for avoiding risk-taking behavior  
306 (Zalocusky et al., 2016). They showed D2-MSN activation in the NAc contributes to avoiding a risky choice.  
307 Our results basically support their data and extend it to that D2-MSN activity in the NAc is involved in  
308 suppressing the action associated with the negative outcome as well as a risky choice. However, they showed  
309 D2-MSN activation occurs before the decision in the trial after the failure of risky-choice and optogenetic  
310 activation of D2-MSN during the decision period is sufficient to avoid a risky choice. Our data showed that  
311 optogenetic inhibition of D2-MSN in the NAc during ITI or Cue period did not affect the decision. Although  
312 the exact mechanism is unknown because they did not test the effect of optogenetic activation of D2-MSN in  
313 the NAc during outcome period on a risky choice, the timing of activation of D2-MSN in the NAc may differ  
314 depending on the task. Moreover, their target is a medial region of the NAc, while our target is the lateral  
315 region. Because dopamine dynamics are different depending on the region of the NAc (Iino et al., 2020; Jong  
316 et al., 2019), the difference in activation timing may depend on the region. However, further investigations are  
317 needed in the future.

318           Interestingly, our results showed that optogenetic inhibition of D2-MSN in the NAc during ITI or Cue  
319 period did not affect the performance, suggesting that D2-MSN activity does not contribute to discrimination  
320 itself. Those results also suggest that the action value information is transmitted from the NAc via the  
321 thalamocortical loop and encoded in the neurons in different areas such as the parietal cortex (Akrami et al.,  
322 2018) and the DMS (Tai et al., 2012) during the decision period. Moreover, because it is known that D2-MSN  
323 in the NAc sends inhibitory input onto the VP (Gallo et al., 2018) and inhibition of GABAergic neurons in the

324 VP reduces the risky choice (Farrell et al., 2021), inhibition of GABAergic neurons in the VP via D2-MSN in  
325 the NAc could be important for avoiding a bad option.

326 A previous study has shown that inhibition of D2-MSN in the NAc could lead to rewarding effects  
327 (Gallo et al., 2018). However, our results cannot be explained by simple rewarding effects because optogenetic  
328 inhibition of D2-MSN in the NAc selectively sped up the response latency in the trial after error. If the  
329 rewarding effect by optogenetic inhibition affects the performance in the VD-Avoid task, the response latency  
330 in the trial after correct should be similarly decreased. Given that activation of D2-MSN in the NAc increases  
331 the motivation, D2-MSN in the NAc could be involved in decision making via complex mechanisms. This  
332 history-dependent effect on response latencies is interesting from a psychological point of view. A number of  
333 psychological studies has reported that subjects tend to slow down the response on the current trial after having  
334 committed an error on the previous trial (Houtman et al., 2012; Notebaert et al., 2009; Rabbitt and Rodgers,  
335 1977; Ruitenberg et al., 2014). Although the neural mechanisms underlying the post-error slowing have been  
336 not fully understood, in this study we have shown that inhibition of D2-MSN in the NAc sped up the response  
337 latency in the trials after error choice. The result suggests that activation of D2-MSN in the NAc after error  
338 choice contributes to the post-error slowing.

339 Contradictory to a classical model, our results showed a subset of D1-MSNs in the NAc encodes the  
340 negative information. However, given that it is reported that a subset of D1-MSN in the dorsal striatum  
341 selectively encodes the aversive information (Kim et al., 2020; Xiao et al., 2020), the NAcCore could also  
342 include the similar subset of D1-MSN. Given that majority of D1-MSN in the NAc were activated by reward  
343 and bulk inhibition of D1-MSN decreased the motivation in our experiments, we conclude that D1-MSN in the  
344 NAc mainly plays an important role in motivation. However, interestingly, chemogenetic suppression of D1-  
345 MSN in the NAc affected the performance in a recent history-dependent manner. This result cannot be  
346 explained by the simple effect of decreased motivation. Although further experiments are required, we think  
347 that there are at least three subpopulations in D1-MSN of the NAc. The first population is involved in a general  
348 motivation control. The second modulates the behavior based on reward history. The third encodes a negative  
349 prediction error. Although we could not analyze the contribution of D1-MSN to the strategy because bulk  
350 suppression of D1-MSN in the NAc drastically decreased the motivation, given that D1-MSN in the NAc plays

351 an important role in approaching behaviors in the Pavlovian conditioning (Macpherson and Hikida, 2018), we  
352 expect that a subset of D1-MSN in the NAc contribute to the strategy to choose a good option. Considering  
353 that D2-MSN in the NAc were activated by error and inhibition of D2-MSN in the NAc decreased the  
354 performance in the trials after error response, D1-MSN and D2-MSN in the NAc have opposite functions in  
355 the visual discrimination learning and activation of D1-MSN by reward and activation of D2-MSN by error  
356 could lead to making the same choice (e.g. via high confidence) and avoid the previous choice, respectively.  
357 Moreover, D2-MSN is involved in reversal learning and switching behaviors (Macpherson et al., 2016;  
358 Matamales et al., 2020; Tsutsui-Kimura et al., 2017b; Yawata et al., 2012). Because these behaviors are  
359 modulated by negative prediction error (e.g. reward omission), the strategy to avoid a bad option is required.  
360 Although further experiments are needed to test if the same population regulate the strategy to avoid a bad  
361 option and reversal learning, we conclude that D2-MSN in the NAc is important for detecting a negative  
362 outcome and avoiding the action associated with the negative outcome.

363           It is known that decision strategy could be influenced by a brain state and maladaptive decision  
364 making can be observed in various neurological and psychiatric disorders such as Parkinson's disease, drug  
365 addiction, and mood disorders (Frank et al., 2004; Hikida et al., 2010; Kunisato et al., 2012; Strickland et al.,  
366 2016). In Parkinson's disease, it is known that cell death of dopamine neurons occurs and acute dopamine  
367 depletion leads to overactivation of D2-MSN (Parker et al., 2018). Moreover, a study shows that repeated  
368 cocaine treatment reduced the frequency of miniature excitatory postsynaptic currents in D2-MSN (Kim et al.,  
369 2011). These studies suggest that increase in excitability of D2-MSN leads to the strategy to avoid a bad option,  
370 while decrease in excitability of D2-MSN causes to disability to avoid a bad option. These bidirectional effects  
371 on the strategy support our hypothesis that activation of D2-MSN plays an important role in avoiding a bad  
372 option. Although it is difficult to explain with one factor because the plasticity change occurs at neural circuit  
373 level in various neurological and psychiatric disorders (Macpherson and Hikida, 2019), it is likely that  
374 excitability of D2-MSN contributes to the strategy to avoid a bad option. In contrast to L-dopa treatment,  
375 depression selectively disrupts the strategy to choose a good option (Kunisato et al., 2012). Because depression  
376 is strongly related to the concentration of serotonin in the brain (Warden et al., 2012), the abnormal neural

377 activity of a subset of the neuron in the NAc via serotonin receptor could be associated with the disability to  
378 execute the strategy to choose a good option.

379 In conclusion, we provide the evidence in which D2-MSN in the NAc selectively contributes to the  
380 strategy to avoid a bad option. Moreover, activation of D2-MSN in the NAc by error choices plays an  
381 important role in acquisition of the strategy to avoid a bad option. Understanding the neural mechanisms  
382 underlying the strategy will help to treat with dysfunctions to execute the appropriate strategy in various  
383 psychiatric disorders such as Parkinson's disease, drug addiction, and mood disorders. In addition, the  
384 development of VD-Attend and VD-Avoid task could lead to a useful novel model to understand the neural  
385 mechanisms by which different people execute different strategies depending on the genes, situations,  
386 developments, and ages.

387

388

### 389 **ACKNOWLEDGEMENTS**

390 This work was supported by MEXT/JSPS KAKENHI grants numbers, JP21K15209 (to T.N.), JP21K15210 (to  
391 T.M.), JP19H04983 and JP21H02804 (to K.H.), JP16H06568 and JP18H02542 (to T.H.), by AMED under  
392 grant number JP21wm0425010 (to T.H.), by Takeda Life Science Research Foundation (to T.H.), by the Salt  
393 Science Research Foundation (No. 2137 to T.H.), by Taiju Life Social Welfare Foundation (to T.H.), and by  
394 Smoking Research Foundation (to T.H.). We thank members of Hikida laboratory for maintenance of animals  
395 and helpful discussion.

396

### 397 **AUTHOR CONTRIBUTIONS**

398 T.N. conceived the project, conducted all the experiments, performed the analysis, and wrote the manuscript.  
399 T.M. supported calcium imaging experiments. K.H. and T.H. contributed to the analysis. T.H. supervised the  
400 project. T.M., K.H., and T.H. reviewed and edited the manuscript.

401

### 402 **DECLARATION OF INTERESTS**

403 The authors declare no competing financial interests.

404

405 **REFERENCES**

406

407 Aberman, J.E., Ward, S.J., and Salamone, J.D. (1998). Effects of Dopamine Antagonists and Accumbens  
408 Dopamine Depletions on Time- Constrained Progressive-Ratio Performance. *Pharmacology Biochemistry and*  
409 *Behavior* 61, 341–348.

410 Akrami, A., Kopec, C.D., Diamond, M.E., and Brody, C.D. (2018). Posterior parietal cortex represents sensory  
411 history and mediates its effects on behaviour. *Nature* 554, 368–372.

412 Aragona, B.J., Liu, Y., Yu, Y.J., Curtis, J.T., Detwiler, J.M., Insel, T.R., and Wang, Z. (2006). Nucleus  
413 accumbens dopamine differentially mediates the formation and maintenance of monogamous pair bonds. *Nat*  
414 *Neurosci* 9, 133–139.

415 Armbruster, B.N., Li, X., Pausch, M.H., Herlitze, S., and Roth, B.L. (2007). Evolving the lock to fit the key to  
416 create a family of G protein-coupled receptors potently activated by an inert ligand. *Proc National Acad Sci*  
417 *104*, 5163–5168.

418 Bakhurin, K.I., Li, X., Friedman, A.D., Lusk, N.A., Watson, G.D., Kim, N., and Yin, H.H. (2020). Opponent  
419 regulation of action performance and timing by striatonigral and striatopallidal pathways. *Elife* 9, e54831.

420 Berridge, K.C. (2007). The debate over dopamine’s role in reward: the case for incentive salience.  
421 *Psychopharmacology* 191, 391–431.

422 Berridge, K.C., and Kringelbach, M.L. (2008). Affective neuroscience of pleasure: reward in humans and  
423 animals. *Psychopharmacology* 199, 457–480.

424 Carlezon, W.A., and Thomas, M.J. (2009). Biological substrates of reward and aversion: A nucleus accumbens  
425 activity hypothesis. *Neuropharmacology* 56, 122–132.

426 Cepeda, C., Buchwald, N.A., and Levine, M.S. (1993). Neuromodulatory actions of dopamine in the  
427 neostriatum are dependent upon the excitatory amino acid receptor subtypes activated. *Proc National Acad Sci*  
428 *90*, 9576–9580.

429 Cohen, J.Y., Haesler, S., Vong, L., Lowell, B.B., and Uchida, N. (2012). Neuron-type-specific signals for  
430 reward and punishment in the ventral tegmental area. *Nature* 482, 85–88.

431 Dana, H., Sun, Y., Mohar, B., Hulse, B.K., Kerlin, A.M., Hasseman, J.P., Tsegaye, G., Tsang, A., Wong, A.,  
432 Patel, R., et al. (2019). High-performance calcium sensors for imaging activity in neuronal populations and  
433 microcompartments. *Nat Methods* 16, 649–657.

434 Danjo, T., Yoshimi, K., Funabiki, K., Yawata, S., and Nakanishi, S. (2014). Aversive behavior induced by  
435 optogenetic inactivation of ventral tegmental area dopamine neurons is mediated by dopamine D2 receptors in  
436 the nucleus accumbens. *Proc National Acad Sci* 111, 6455–6460.

437 Delgado, M.R. (2007). Reward-Related Responses in the Human Striatum. *Ann Ny Acad Sci* 1104, 70–88.



- 438 Farrell, M.R., Esteban, J.S.D., Faget, L., Floresco, S.B., Hnasko, T.S., and Mahler, S.V. (2021). Ventral  
439 Pallidum GABA Neurons Mediate Motivation Underlying Risky Choice. *J Neurosci* *41*, 4500–4513.
- 440 Ferenczi, E.A., Zalocusky, K.A., Liston, C., Grosenick, L., Warden, M.R., Amatya, D., Katovich, K., Mehta,  
441 H., Patenaude, B., Ramakrishnan, C., et al. (2016). Prefrontal cortical regulation of brainwide circuit dynamics  
442 and reward-related behavior. *Science* *351*, aac9698.
- 443 Frank, M.J., Seeberger, L.C., and O'Reilly, R.C. (2004). By carrot or by stick: cognitive reinforcement  
444 learning in parkinsonism. *Science* *306*, 1940–1943.
- 445 Frank, M.J., Samanta, J., Moustafa, A.A., and Sherman, S.J. (2007). Hold your horses: impulsivity, deep brain  
446 stimulation, and medication in parkinsonism. *Science* *318*, 1309–1312.
- 447 Gallo, E.F., Meszaros, J., Sherman, J.D., Chohan, M.O., Teboul, E., Choi, C.S., Moore, H., Javitch, J.A., and  
448 Kellendonk, C. (2018). Accumbens dopamine D2 receptors increase motivation by decreasing inhibitory  
449 transmission to the ventral pallidum. *Nat Commun* *9*, 1086.
- 450 Gerfen, C.R., and Surmeier, D.J. (2011). Modulation of Striatal Projection Systems by Dopamine. *Annu Rev*  
451 *Neurosci* *34*, 441–466.
- 452 Hamid, A.A., Pettibone, J.R., Mabrouk, O.S., Hetrick, V.L., Schmidt, R., Weele, C.M.V., Kennedy, R.T.,  
453 Aragona, B.J., and Berke, J.D. (2015). Mesolimbic dopamine signals the value of work. *Nat Neurosci* *19*, 117–  
454 126.
- 455 Han, X., Chow, B.Y., Zhou, H., Klapoetke, N.C., Chuong, A., Rajimehr, R., Yang, A., Baratta, M.V., Winkle,  
456 J., Desimone, R., et al. (2011). A High-Light Sensitivity Optical Neural Silencer: Development and  
457 Application to Optogenetic Control of Non-Human Primate Cortex. *Frontiers Syst Neurosci* *5*, 18.
- 458 Hikida, T., Kimura, K., Wada, N., Funabiki, K., and Nakanishi, S. (2010). Distinct roles of synaptic  
459 transmission in direct and indirect striatal pathways to reward and aversive behavior. *Neuron* *66*, 896–907.
- 460 Houtman, F., Castellar, E.N., and Notebaert, W. (2012). Orienting to errors with and without immediate  
461 feedback. *J Cogn Psychol* *24*, 278–285.
- 462 Iino, Y., Sawada, T., Yamaguchi, K., Tajiri, M., Ishii, S., Kasai, H., and Yagishita, S. (2020). Dopamine D2  
463 receptors in discrimination learning and spine enlargement. *Nature* *579*, 555–560.
- 464 Jong, J.W. de, Afjei, S.A., Dorocic, I.P., Peck, J.R., Liu, C., Kim, C.K., Tian, L., Deisseroth, K., and Lammel,  
465 S. (2019). A Neural Circuit Mechanism for Encoding Aversive Stimuli in the Mesolimbic Dopamine System.  
466 *Neuron* *101*, 133–151.e7.
- 467 Kang, B.J., Song, S.S., Wen, L., Hong, K., Augustine, G.J., and Baik, J. (2017). Effect of optogenetic  
468 manipulation of accumbal medium spiny neurons expressing dopamine D2 receptors in cocaine-induced  
469 behavioral sensitization. *Eur J Neurosci* *46*, 2056–2066.
- 470 Kim, C.K., Sanchez, M.I., Hoerbelt, P., Fenno, L.E., Malenka, R.C., Deisseroth, K., and Ting, A.Y. (2020). A  
471 Molecular Calcium Integrator Reveals a Striatal Cell Type Driving Aversion. *Cell* *183*, 2003–2019.e16.
- 472 Kim, J., Park, B.-H., Lee, J.H., Park, S.K., and Kim, J.-H. (2011). Cell Type-Specific Alterations in the  
473 Nucleus Accumbens by Repeated Exposures to Cocaine. *Biol Psychiat* *69*, 1026–1034.

- 474 Kravitz, A.V., Freeze, B.S., Parker, P.R.L., Kay, K., Thwin, M.T., Deisseroth, K., and Kreitzer, A.C. (2010).  
475 Regulation of parkinsonian motor behaviours by optogenetic control of basal ganglia circuitry. *Nature* *466*,  
476 622–626.
- 477 Kravitz, A.V., Tye, L.D., and Kreitzer, A.C. (2012). Distinct roles for direct and indirect pathway striatal  
478 neurons in reinforcement. *Nat Neurosci* *15*, 816–818.
- 479 Kunisato, Y., Okamoto, Y., Ueda, K., Onoda, K., Okada, G., Yoshimura, S., Suzuki, S., Samejima, K., and  
480 Yamawaki, S. (2012). Effects of depression on reward-based decision making and variability of action in  
481 probabilistic learning. *J Behav Ther Exp Psy* *43*, 1088–1094.
- 482 Lee, D. (2013). Decision Making: From Neuroscience to Psychiatry. *Neuron* *78*, 233–248.
- 483 Lobo, M.K., Covington, H.E., Chaudhury, D., Friedman, A.K., Sun, H., Damez-Werno, D., Dietz, D.M.,  
484 Zaman, S., Koo, J.W., Kennedy, P.J., et al. (2010). Cell Type-Specific Loss of BDNF Signaling Mimics  
485 Optogenetic Control of Cocaine Reward. *Science* *330*, 385–390.
- 486 Lu, X.-Y., Ghasemzadeh, M.B., and Kalivas, P.W. (1997). Expression of D1 receptor, D2 receptor, substance  
487 P and enkephalin messenger RNAs in the neurons projecting from the nucleus accumbens. *Neuroscience* *82*,  
488 767–780.
- 489 Luo, Y.-J., Li, Y.-D., Wang, L., Yang, S.-R., Yuan, X.-S., Wang, J., Cherasse, Y., Lazarus, M., Chen, J.-F., Qu,  
490 W.-M., et al. (2018). Nucleus accumbens controls wakefulness by a subpopulation of neurons expressing  
491 dopamine D1 receptors. *Nat Commun* *9*, 1576.
- 492 Macpherson, T., and Hikida, T. (2018). Nucleus Accumbens Dopamine D1-Receptor-Expressing Neurons  
493 Control the Acquisition of Sign-Tracking to Conditioned Cues in Mice. *Front Neurosci-Switz* *12*, 418.
- 494 Macpherson, T., and Hikida, T. (2019). Role of basal ganglia neurocircuitry in the pathology of psychiatric  
495 disorders. *Psychiat Clin Neuros* *73*, 289–301.
- 496 Macpherson, T., Morita, M., Wang, Y., Sasaoka, T., Sawa, A., and Hikida, T. (2016). Nucleus accumbens  
497 dopamine D2-receptor expressing neurons control behavioral flexibility in a place discrimination task in the  
498 IntelliCage. *Learn Memory* *23*, 359–364.
- 499 Maia, T.V., and Frank, M.J. (2011). From reinforcement learning models to psychiatric and neurological  
500 disorders. *Nat Neurosci* *14*, 154–162.
- 501 Matamales, M., McGovern, A.E., Mi, J.D., Mazzone, S.B., Balleine, B.W., and Bertran-Gonzalez, J. (2020).  
502 Local D2- to D1-neuron transmodulation updates goal-directed learning in the striatum. *Science* *367*, 549–555.
- 503 Morita, M., Wang, Y., Sasaoka, T., Okada, K., Niwa, M., Sawa, A., and Hikida, T. (2016). Dopamine D2L  
504 Receptor Is Required for Visual Discrimination and Reversal Learning. *Mol Neuropsychiatry* *2*, 124–132.
- 505 Notebaert, W., Houtman, F., Opstal, F.V., Gevers, W., Fias, W., and Verguts, T. (2009). Post-error slowing:  
506 An orienting account. *Cognition* *111*, 275–279.
- 507 Parker, J.G., Marshall, J.D., Ahanonu, B., Wu, Y.-W., Kim, T.H., Grewe, B.F., Zhang, Y., Li, J.Z., Ding, J.B.,  
508 Ehlers, M.D., et al. (2018). Diametric neural ensemble dynamics in parkinsonian and dyskinetic states. *Nature*  
509 *557*, 177–182.

- 510 Parker, N.F., Cameron, C.M., Taliaferro, J.P., Lee, J., Choi, J.Y., Davidson, T.J., Daw, N.D., and Witten, I.B.  
511 (2016). Reward and choice encoding in terminals of midbrain dopamine neurons depends on striatal target. *Nat*  
512 *Neurosci* *19*, 845–854.
- 513 Rabbitt, P., and Rodgers, B. (1977). What does a Man do after he Makes an Error? An Analysis of Response  
514 Programming. *Q J Exp Psychol* *29*, 727–743.
- 515 Roitman, M.F., Wheeler, R.A., and Carelli, R.M. (2005). Nucleus Accumbens Neurons Are Innately Tuned for  
516 Rewarding and Aversive Taste Stimuli, Encode Their Predictors, and Are Linked to Motor Output. *Neuron* *45*,  
517 587–597.
- 518 Roitman, M.F., Wheeler, R.A., Wightman, R.M., and Carelli, R.M. (2008). Real-time chemical responses in  
519 the nucleus accumbens differentiate rewarding and aversive stimuli. *Nat Neurosci* *11*, 1376–1377.
- 520 Ruitenberg, M.F.L., Abrahamse, E.L., Kleine, E.D., and Verwey, W.B. (2014). Post-error slowing in  
521 sequential action: an aging study. *Front Psychol* *5*, 119.
- 522 Salamone, J.D., Correa, M., Farrar, A., and Mingote, S.M. (2007). Effort-related functions of nucleus  
523 accumbens dopamine and associated forebrain circuits. *Psychopharmacology* *191*, 461–482.
- 524 Samejima, K., Ueda, Y., Doya, K., and Kimura, M. (2005). Representation of action-specific reward values in  
525 the striatum. *Science* *310*, 1337–1340.
- 526 Schultz, W., Apicella, P., Scarnati, ” Eugenio , and Ljungberg, T. (1992). Neuronal Activity in Monkey  
527 Ventral Striatum Related to the Expectation of Reward. *The Journal of Neuroscience* *12*, 4595–4610.
- 528 Schultz, W., Dayan, P., and Montague, P.R. (1997). A neural substrate of prediction and reward. *Science* *275*,  
529 1593–1599.
- 530 Sheintuch, L., Rubin, A., Brande-Eilat, N., Geva, N., Sadeh, N., Pinchasof, O., and Ziv, Y. (2017). Tracking  
531 the Same Neurons across Multiple Days in Ca<sup>2+</sup> Imaging Data. *Cell Reports* *21*, 1102–1115.
- 532 Shen, W., Flajolet, M., Greengard, P., and Surmeier, D.J. (2008). Dichotomous Dopaminergic Control of  
533 Striatal Synaptic Plasticity. *Science* *321*, 848–851.
- 534 Shin, J.H., Kim, D., and Jung, M.W. (2018). Differential coding of reward and movement information in the  
535 dorsomedial striatal direct and indirect pathways. *Nat Commun* *9*, 404.
- 536 Stephenson-Jones, M., Yu, K., Ahrens, S., Tucciarone, J.M., Huijstee, A.N. van, Mejia, L.A., Penzo, M.A., Tai,  
537 L.-H., Wilbrecht, L., and Li, B. (2016). A basal ganglia circuit for evaluating action outcomes. *Nature* *539*,  
538 289–293.
- 539 Stoof, J.C., and Kebabian, J.W. (1984). Two dopamine receptors: Biochemistry, physiology and pharmacology.  
540 *Life Sci* *35*, 2281–2296.
- 541 Strickland, J.C., Bolin, B.L., Lile, J.A., Rush, C.R., and Stoops, W.W. (2016). Differential sensitivity to  
542 learning from positive and negative outcomes in cocaine users. *Drug Alcohol Depen* *166*, 61–68.
- 543 Surmeier, D.J., Ding, J., Day, M., Wang, Z., and Shen, W. (2007). D1 and D2 dopamine-receptor modulation  
544 of striatal glutamatergic signaling in striatal medium spiny neurons. *Trends Neurosci* *30*, 228–235.

- 545 Surmeier, D.J., Plotkin, J., and Shen, W. (2009). Dopamine and synaptic plasticity in dorsal striatal circuits  
546 controlling action selection. *Curr Opin Neurobiol* 19, 621–628.
- 547 Tai, L.-H., Lee, A.M., Benavidez, N., Bonci, A., and Wilbrecht, L. (2012). Transient stimulation of distinct  
548 subpopulations of striatal neurons mimics changes in action value. *Nat Neurosci* 15, 1281–1289.
- 549 Tecuapetla, F., Jin, X., Lima, S.Q., and Costa, R.M. (2016). Complementary Contributions of Striatal  
550 Projection Pathways to Action Initiation and Execution. *Cell* 166, 703–715.
- 551 Tsutsui-Kimura, I., Takiue, H., Yoshida, K., Xu, M., Yano, R., Ohta, H., Nishida, H., Bouchekioua, Y., Okano,  
552 H., Uchigashima, M., et al. (2017a). Dysfunction of ventrolateral striatal dopamine receptor type 2-expressing  
553 medium spiny neurons impairs instrumental motivation. *Nat Commun* 8, 14304.
- 554 Tsutsui-Kimura, I., Natsubori, A., Mori, M., Kobayashi, K., Drew, M.R., d’Exaerde, A. de K., Mimura, M.,  
555 and Tanaka, K.F. (2017b). Distinct Roles of Ventromedial versus Ventrolateral Striatal Medium Spiny  
556 Neurons in Reward-Oriented Behavior. *Curr Biol* 27, 3042-3048.e4.
- 557 Tversky, A., and Kahneman, D. (1981). The framing of decisions and the psychology of choice. *Science* 211,  
558 453–458.
- 559 Warden, M.R., Selimbeyoglu, A., Mirzabekov, J.J., Lo, M., Thompson, K.R., Kim, S.-Y., Adhikari, A., Tye,  
560 K.M., Frank, L.M., and Deisseroth, K. (2012). A prefrontal cortex-brainstem neuronal projection that controls  
561 response to behavioural challenge. *Nature* 492, 428–432.
- 562 Wulff, P., and Arenkiel, B.R. (2012). Chemical genetics: receptor–ligand pairs for rapid manipulation of  
563 neuronal activity. *Curr Opin Neurobiol* 22, 54–60.
- 564 Xiao, X., Deng, H., Furlan, A., Yang, T., Zhang, X., Hwang, G.-R., Tucciarone, J., Wu, P., He, M.,  
565 Palaniswamy, R., et al. (2020). A Genetically Defined Compartmentalized Striatal Direct Pathway for  
566 Negative Reinforcement. *Cell* 183, 211-227.e20.
- 567 Yagishita, S., Hayashi-Takagi, A., Ellis-Davies, G.C.R., Urakubo, H., Ishii, S., and Kasai, H. (2014). A critical  
568 time window for dopamine actions on the structural plasticity of dendritic spines. *Science* 345, 1616–1620.
- 569 Yao, Y., Gao, G., Liu, K., Shi, X., Cheng, M., Xiong, Y., and Song, S. (2021). Projections from D2 Neurons in  
570 Different Subregions of Nucleus Accumbens Shell to Ventral Pallidum Play Distinct Roles in Reward and  
571 Aversion. *Neurosci Bull* 37, 623–640.
- 572 Yawata, S., Yamaguchi, T., Danjo, T., Hikida, T., and Nakanishi, S. (2012). Pathway-specific control of  
573 reward learning and its flexibility via selective dopamine receptors in the nucleus accumbens. *Proc National*  
574 *Acad Sci* 109, 12764–12769.
- 575 Zalocusky, K.A., Ramakrishnan, C., Lerner, T.N., Davidson, T.J., Knutson, B., and Deisseroth, K. (2016).  
576 Nucleus accumbens D2R cells signal prior outcomes and control risky decision-making. *Nature* 531, 642–646.
- 577 Zhou, L., Furuta, T., and Kaneko, T. (2003). Chemical organization of projection neurons in the rat accumbens  
578 nucleus and olfactory tubercle. *Neuroscience* 120, 783–798.
- 579 Zhou, P., Resendez, S.L., Rodriguez-Romaguera, J., Jimenez, J.C., Neufeld, S.Q., Giovannucci, A., Friedrich,  
580 J., Pnevmatikakis, E.A., Stuber, G.D., Hen, R., et al. (2018). Efficient and accurate extraction of in vivo  
581 calcium signals from microendoscopic video data. *Elife* 7, e28728.

582

583

## 584 **METHOD DETAILS**

### 585 **Animals**

586 Wild-type C57BL/6J mice (male, 8-10 weeks old) were used for validation of behavioral experiments. For  
587 DREADD, optogenetic, and calcium imaging experiments, male heterozygous D1-Cre (FK150Gsat) and D2-  
588 Cre (ER44Gsat) mice were used (DREADD, D1-Cre, n = 12, one mouse was excluded due to no viral  
589 expression; D2-Cre, n = 12, one mouse was excluded due to unstable behavior; optogenetics, D2-Cre, n = 19, 2  
590 mice were excluded due to insufficient conditioning; calcium imaging, D1-Cre, n = 3; D2-Cre, n = 4, one  
591 mouse was excluded because GRIN lens was located anterior to the NAc). D1-Cre and D2-Cre were  
592 maintained in a C57BL/6J background. Animals were housed on a 12-hour light/dark cycle. Behavioral studies  
593 were conducted during the light cycle. Mice were kept on water restriction during behavioral testing. For all  
594 behavioral experiments except for calcium imaging experiment, mice were grouped housed throughout the  
595 experiments. For calcium imaging experiment, mice were singly housed after GRIN lens implantation. All  
596 experiments conformed to the guidelines of the National Institutes of Health experimental procedures, and  
597 were approved by the Animal Experimental Committee of Institute for Protein Research at Osaka University  
598 (approval ID 29-02-1).

599

### 600 **Stereotaxic Surgery**

601 All mice used in this study were anesthetized with ketamine (100 mg/kg) and xylazine (20 mg/kg) for surgical  
602 procedures and placed in a stereotaxic frame (Kopf Instruments).

603 For DREADD experiments, heterozygous D1-Cre or D2-Cre mice were bilaterally injected with 400  
604 nl of AAV5-hSyn-DIO-hM4Di(Gi)-mCherry ( $5.1 \times 10^{12}$  GC/ml, UNC) or AAV5-hSyn-DIO-mCherry ( $5.2 \times 10^{12}$   
605 GC/ml, UNC) using a Nanoject II instrument (Drummond) at a rate of 100 nl/min (coordinates in mm: AP  
606 +1.20, ML  $\pm 1.25$  from bregma, and DV -3.50 from brain surface. The injection pipette remained in place for  
607 5–10 min to reduce backflow.

608 For optogenetics experiments, heterozygous D2-Cre mice were bilaterally injected with 400 nl of  
609 AAV5-CAG-FLEX-ArchT3.0-tdTomato ( $1.3 \times 10^{13}$  GC/ml, Addgene) or AAV5-EF1a-DIO-eYFP ( $1.3 \times 10^{13}$   
610 GC/ml, Addgene) were using a Nanoject III instrument (Drummond) at a rate of 100 nl/min (coordinates in  
611 mm: AP +1.20, ML  $\pm 1.25$  from bregma, and DV  $-3.50$  from brain surface. The injection pipette remained in  
612 place for 5–10 min to reduce backflow. After retraction, 200  $\mu$ m diameter (NA 0.37) optic fibers (Thorlabs)  
613 were bilaterally implanted with the dental cement (Superbond) at AP +1.20, ML  $\pm 1.30$  from bregma, and DV  
614  $-3.20$  from brain surface.

615 For calcium imaging experiments, heterozygous D1-Cre or D2-Cre mice were unilaterally injected  
616 with 1200 nl of AAV9-FLEX-jGCaMP7f ( $9.6 \times 10^{12}$  GC/ml, Addgene) were stereotaxically injected using a  
617 Nanoject III instrument (Drummond) at a rate of 100 nl/min (coordinates in mm: AP +1.20, ML  $\pm 1.25$  from  
618 bregma, and DV  $-3.60$  and  $-3.10$  from brain surface. The injection pipette remained in place for 5–10 min to  
619 reduce backflow. After virus injection, a sterile 21-gauge needle was slowly lowered into the brain to a depth  
620 of  $-2.0$  mm from the brain surface to aspirate brain tissue above the NAc. The GRIN lens (600  $\mu$ m diameter,  
621 Inscopix) was slowly lowered into the brain to a depth of  $-3.20$  mm from the brain surface by using a GRIN  
622 lens holder (Inscopix). We secured the GRIN lens to the skull with the dental cement (Superbond). A silicone  
623 elastomer (Kwik-Cast; World Precision Instruments) was applied to the top of the lens to prevent an external  
624 damage. Four to six weeks after lens implantation, a baseplate (Inscopix) attached to the miniature microscope  
625 (nVista; Inscopix) was positioned above the GRIN lens. The focal plane was adjusted on the basis of the  
626 position that blood vessels were clearly observed. After positioning adjustment, the baseplate was secured with  
627 the dental cement.

628

## 629 **Behavioral Experiments**

630 *Apparatus.* Training and testing were conducted in a Bussey-Saksida touchscreen chamber (Lafayette  
631 Instrument). A black plastic mask with 2 windows ( $70 \times 75$  mm<sup>2</sup> spaced, 5 mm apart, 16 mm above the floor)  
632 was placed in front of the touchscreen. ABET II and WhiskerServer software (Lafayette) were used to control  
633 operant system and data collection.

634

635 *Pretraining.* As the first phase (3 days), mice were habituated to the chamber in 40-min sessions. Diluted  
636 condensed milk (7  $\mu$ l, Morinaga Milk) was dispensed in the food magazine every 10 sec. In the following  
637 phase (1 day), a stimulus was randomly displayed in one of the 2 windows. After a 30-sec stimulus  
638 presentation, the milk reward (20  $\mu$ l) was delivered with a tone (3 kHz) and magazine light. When mice  
639 collected the reward, the magazine light went out, and the next trial commenced (60 trials, or up to 60 min)  
640 with a new stimulus after a 20-sec intertrial interval (ITI). In the next phase, stimuli were randomly displayed  
641 in one of 2 windows, and mice were obligated to touch the stimulus to receive a reward. In the final phase of  
642 the pretraining, when a blank window was touched, mice were punished with a 5-sec time-out. After reaching  
643 criterion (77% correct for 2 consecutive days), mice moved on to basic training.

644

645 *Basic training.* Mice were tested 5–6 days per week (60 trials per day, or up to 60 min). Each trial  
646 was initiated after mice nose-poked in the magazine. The visual cues were presented until mice respond to any  
647 windows.

648 For VD-Attend task, two visual cues (Marble and a random image) were presented in the touchscreen.  
649 A random image was pseudorandomly chosen from 51 images. If a mouse responded to visual cue “Marble”,  
650 milk reward (7  $\mu$ l) was delivered with a tone (3 kHz) and magazine light. When mice collected the reward, the  
651 magazine light went out, and the next trial commenced (60 trials, or up to 60 min) with a new stimulus after a  
652 20-sec intertrial interval (ITI). If a mouse responded to visual cue “a random image”, the mouse was punished  
653 with a 5-sec time-out (house light on).

654 For VD-avoid task, two visual cues (Flag and a random image) were presented in the touchscreen. If a  
655 mouse responded to visual cue “a random image”, milk reward (7  $\mu$ l) was delivered with a tone (3 kHz) and  
656 magazine light. If a mouse responded to visual cue “Flag”, the mouse was punished with a 5-sec time-out  
657 (house light on).

658 A response to a random image was recorded as a correct response, while a response to visual cue “Flag” was  
659 recorded as an incorrect response.

660 After reaching criterion (>80% correct for 2 consecutive days), mice moved on to probe test for  
661 DREADD experiments, cable habituation for optogenetic experiments, respectively.

662 For DREADD experiments, vehicle at day1, 2, 3, 5, or CNO (1.0 mg/kg diluted with vehicle, Sigma  
663 Aldrich) at day4, 6 was intraperitoneally administered 30 min before the session.

664 For optogenetic inhibition experiments, once the performance stabilized (>80% correct for 2  
665 consecutive days) with cable, optogenetic stimulation starts. LED power was set to 1-3 mW. Stimulation  
666 schedule was counterbalanced.

667 For calcium imaging experiments, data was acquired at 20 Hz with 0.6 mW LED at the first session of  
668 the basic training (Novice) and the session after reaching criterion (the criterion session; Expert). After  
669 acquisition, calcium recording files were temporally (factor of 2) and spatially (factor of 4) downsampled and  
670 motion-corrected using Inscopix Data Processing software ver 1.3.0. The fluorescent traces of individual  
671 neurons were extracted from these images by CNMFe (Zhou et al., 2018). Z-scores were calculated from all  
672 recording data.

673 Percentage correct (correct trials divided by correct plus incorrect trials, recorded as percent), and  
674 latencies to correct response, incorrect response, and reward collection were monitored in all behavioral  
675 experiments.

676

## 677 **Histology**

678 Animals were deeply anesthetized and transcardially perfused with 0.01 M PBS followed by 4%  
679 paraformaldehyde (PFA) in 0.1 M PB (pH 7.4). Brains were removed and post-fixed with 4% PFA at 4 °C for  
680 2 days. After cryoprotection, brains were embedded in OCT compound and cryosectioned (40 µm). Sections  
681 were mounted with antifade mounting medium with DAPI (Vectashield). Stitched images were acquired using a  
682 Keyence BZ-X800 microscope.

683

## 684 **Statistical analyses**

685 Prism (Graphpad) software was used for statistical analyses. The behavioral performances in wild-type were  
686 analyzed using unpaired t-test. DREADD data were analyzed using two-way RM ANOVA with Group  
687 (hM4Di, mCherry) and Drug Treatment (vehicle, CNO) or one-way ANOVA (D1-hM4Di, D2-hM4Di, D1/D2-  
688 mCherry). Optogenetic data were analyzed using two-way RM ANOVA with Group (ArchT, eYFP) and Light



689 stimulation (OFF, ON) or History (After Correct, After Error) and Light stimulation (OFF, ON). Post hoc  
690 Sidak's multiple comparisons test was performed when F-ratios were significant ( $p < 0.05$ ). Comparisons of  
691 proportion of cells were made using chi-squared test. Simple linear regression was made to calculate the  
692 correlation of auROC between novice and expert. Frequency distributions were compared using the  
693 Kolmogorov-Smirnov (KS) test. All data are expressed as means  $\pm$  SEM.

694

695

## 696 **Figure Legends**

### 697 **Figure 1. Experimental Design and Behavioral Performances**

698 (A) Experimental design.

699 (B) Timeline of the task events and the definition of the behavioral parameters.

700 (C) The percentage of correct in each session (VD-Attend,  $n = 11$ ; VD-Avoid,  $n = 12$ ).

701 (D) The number of sessions to criterion of the VD-Avoid was higher than that of the VD-Attend task (unpaired  
702 t-test,  $t_{21} = 2.413$ ,  $*p = 0.0251$ ).

703 (E) Total errors to criterion of the VD-Avoid were higher than that of the VD-Attend task (unpaired t-test,  $t_{21} =$   
704  $2.288$ ,  $*p = 0.0326$ ).

705 (F and G) The behavioral performances were similar between the VD-Attend and VD-Avoid task in the 1<sup>st</sup>  
706 session (F, unpaired t-test,  $t_{21} = 0.7053$ ,  $p = 0.4884$ ) and the last session (G, unpaired t-test,  $t_{21} = 1.613$ ,  $p =$   
707  $0.1217$ ).

708 (H and I) Correct latencies were similar between the VD-Attend and VD-Avoid task in the last session (H,  
709 unpaired t-test,  $t_{21} = 1.420$ ,  $p = 0.1704$ ). Reward latencies were similar between the VD-Attend and VD-Avoid  
710 task in the last session (I, unpaired t-test,  $t_{21} = 0.007948$ ,  $p = 0.9937$ ).

711

### 712 **Figure 2. DREADD Suppression of D2-MSN in the NAc Selectively Decreases the Performance of the**

#### 713 **VD-Avoid Task**

714 (A) Experimental timeline.

715 (B) Representative injection site of AAV5-hSyn-DIO-hM4Di-mCherry (Left). Scale bar, 500  $\mu$ m. NAcCore,  
716 nucleus accumbens core; NAcSh, nucleus accumbens shell. Drawings of superimposed AAV injection sites in  
717 the NAc (Right).

718 (C) The effects of DREADD suppression on the behavioral performance of each task in D1-Cre mice (Left, n  
719 = 7), D2-Cre mice (Middle, n = 8). The effects of CNO treatment on the behavioral performance of each task  
720 in D1/D2-mCherry mice (Right, n = 7).

721 (D) DREADD suppression of D1-MSN in the NAc decreased the behavioral performance in both the VD-  
722 Attend and VD-Avoid task (Left, Two-way RM-ANOVA with Sidak correction, Treatment effects,  $F_{1,12} =$   
723 19.83, \*\*\* $p = 0.0008$ ; VD-Attend, \*\* $p = 0.0071$ ; VD-Avoid, \* $p = 0.0394$ ). DREADD suppression of D2-MSN  
724 in the NAc selectively decreased the behavioral performance in the VD-Avoid but not VD-Attend task (Middle,  
725 Two-way RM-ANOVA with Sidak correction, Treatment effects,  $F_{1,14} = 40.88$ , \*\*\* $p < 0.0001$ ; VD-Attend,  $p$   
726 = 0.2334; VD-Avoid, \*\*\* $p < 0.0001$ ). CNO treatment in D1/D2-mCherry did not affect the behavioral  
727 performance in both the VD-Attend and VD-Avoid task (Right, Two-way RM-ANOVA with Sidak correction,  
728 Treatment effects,  $F_{1,12} = 0.8707$ ,  $p = 0.3692$ ; VD-Attend,  $p = 0.7590$ ; VD-Avoid,  $p = 0.1326$ ).

729 (E) The effects of DREADD suppression on the behavioral performance of the VD-Attend task across all  
730 groups (Top, One-way ANOVA with Sidak correction, Group effects,  $F_{2,19} = 8.688$ , \*\* $p = 0.0021$ ; D1-hM4Di  
731 vs D2-hM4Di, \*\* $p = 0.0078$ ; D1-hM4Di vs D1/D2-mCherry, \*\* $p = 0.0039$ ; D2-hM4Di vs D1/D2-mCherry,  $p$   
732 = 0.9643). The effects of DREADD suppression on the behavioral performance of the VD-Avoid task across  
733 all groups (Bottom, One-way ANOVA with Sidak correction, Group effects,  $F_{2,19} = 9.396$ , \*\* $p = 0.0015$ ; D1-  
734 hM4Di vs D2-hM4Di,  $p = 0.9999$ ; D1-hM4Di vs D1/D2-mCherry, \*\* $p = 0.0041$ ; D2-hM4Di vs D1/D2-  
735 mCherry, \*\* $p = 0.0036$ ).

736 (F and G) The effects of DREADD suppression on the motivation indices. DREADD suppression of D1-MSN  
737 in the NAc decreased the number of earned reward (F) in both the VD-Attend and VD-Avoid task (Left, Two-  
738 way RM-ANOVA with Sidak correction, Treatment effects,  $F_{1,12} = 70.32$ , \*\*\* $p < 0.0001$ ; VD-Attend, \*\*\* $p =$   
739 0.0001; VD-Avoid, \*\*\* $p = 0.0002$ ). DREADD suppression of D2-MSN in the Nac did not affect the number  
740 of earned reward in both the VD-Attend and VD-Avoid task (Middle, Two-way RM-ANOVA with Sidak  
741 correction, Treatment effects,  $F_{1,14} = 0.2215$ ,  $p = 0.6451$ ; VD-Attend,  $p = 0.7989$ ; VD-Avoid,  $p = 0.3959$ ).

742 CNO treatment in D1/D2-mCherry did not affect the number of earned reward in both the VD-Attend and VD-  
743 Avoid task (Right, Two-way RM-ANOVA with Sidak correction, Treatment effects,  $F_{1,12} = 0.6391$ ,  $p =$   
744  $0.4396$ ; VD-Attend,  $p = 0.9626$ ; VD-Avoid,  $p = 0.1759$ ). DREADD suppression of D1-MSN in the Nac  
745 increased reward latencies (G) in both the VD-Attend and VD-Avoid task (Left, Two-way RM-ANOVA,  
746 Treatment effects,  $F_{1,12} = 6.259$ ,  $*p = 0.0278$ ). DREADD suppression of D2-MSN in the Nac did not affect  
747 reward latencies in both the VD-Attend and VD-Avoid task (Middle, Two-way RM-ANOVA, Treatment  
748 effects,  $F_{1,14} = 0.8027$ ,  $p = 0.3854$ ). CNO treatment in D1/D2-mCherry did not affect reward latencies in both  
749 the VD-Attend and VD-Avoid task (Right, Two-way RM-ANOVA, Treatment effects,  $F_{1,12} = 3.705$ ,  $p =$   
750  $0.0783$ ).

751

752 **Figure 3. Post-Error Activation of D2-MSN is Necessary for Avoiding a Bad Option**

753 (A) Schematic of viral injection and optic fiber implantation.

754 (B) Representative coronal section with optic fibers. Scale bar, 1 mm.

755 I Schematic of optical stimulation protocol.

756 (D) Optical suppression of D2-MSN in the NAc during ITI period did not affect the behavioral performance  
757 (Two-way RM-ANOVA with Sidak correction, Group  $\times$  Treatment interaction,  $F_{1,15} = 0.05089$ ,  $p = 0.8246$ ;  
758 ArchT,  $n = 9$ ,  $p = 0.9121$ ; eYFP,  $n = 8$ ,  $p = 0.9981$ ).

759 (E) Optical suppression of D2-MSN in the NAc during Cue period did not affect the behavioral performance  
760 (Two-way RM-ANOVA with Sidak correction, Group  $\times$  Treatment interaction,  $F_{1,15} = 0.8700$ ,  $p = 0.3657$ ;  
761 ArchT,  $p = 0.7815$ ; eYFP,  $p = 0.7571$ ).

762 (F) Optical suppression of D2-MSN in the NAc during Outcome period decreased the behavioral performance  
763 in the next trial (Two-way RM-ANOVA with Sidak correction, Group  $\times$  Treatment interaction,  $F_{1,15} = 5.340$ ,  
764  $*p = 0.0355$ ; ArchT,  $p = 0.0271$ ; eYFP,  $p = 0.8368$ ).

765 (G and H) Optical stimulation of D2-MSN in the NAc during Outcome period after error response decreased  
766 the behavioral performance of ArchT mice (G) in the next trial (Two-way RM-ANOVA with Sidak correction,  
767 Treatment effects,  $F_{1,8} = 7.134$ ,  $*p = 0.0283$ ; After Correct,  $p = 0.2634$ ; After Error,  $**p = 0.0029$ ) but not

768 eYFP mice (H, Two-way RM-ANOVA with Sidak correction, Treatment effects,  $F_{1,7} = 0.2682$ ,  $p = 0.6205$ ;  
769 After Correct,  $p = 0.9909$ ; After Error,  $p = 0.8477$ ).

770

771 **Figure 4. Individual D2-MSNs Are Predominantly Activated by Error Choice**

772 (A) A schematic of viral injection and GRIN lens implantation.

773 (B) Representative coronal image of jRCaMP7f expression in D2-MSNs. Scale bar, 500  $\mu\text{m}$ .

774 (C) Maximum projection image of a representative imaging plane. Scale bar, 50  $\mu\text{m}$ .

775 (D) Example traces of individual neurons from a representative mouse performing the VD-Avoid task.

776 (E) Averaged traces of an example neuron showing error response. Trial-by-trial (Top) and averaged (Middle)  
777 responses of an example neuron in correct and error trials. Area under the ROC curve (auROC) reflecting  
778 statistical difference between calcium trace of error and correct trials (Bottom).

779 (F) Averaged traces of an example neuron showing correct response. Trial-by-trial (Top) and averaged  
780 (Middle) responses of an example neuron in correct and error trials. Area under the ROC (auROC) curves  
781 reflecting statistical difference between calcium trace of error and correct trials (Bottom).

782 (G) The first two components of the auROC curves of all the neurons of D1-Cre ( $n = 3$  mice) and D2-Cre mice  
783 ( $n = 3$  mice).

784 (H) Heatmaps of the auROC curves of all the neurons of D1-Cre and D2-Cre mice. Each row represents one  
785 neuron.

786 (I) Averaged traces of the auROC curves from the responsive Type I neurons ( $n = 78$ ) or the responsive Type  
787 II neurons ( $n = 53$ ).

788 (J) The proportion of responsive cells across the session.

789 (K) Averaged proportion of responsive cells during ITI, Cue, or Outcome period. The proportion of responsive  
790 cells during Outcome period was more than that during ITI or Cue period in both D1-Cre (Top, Chi-square test  
791 with Bonferroni correction,  $\chi^2 = 47.92$ , ITI vs Cue,  $p > 0.9999$ ; ITI vs Outcome,  $***p < 0.0001$ ; Cue vs  
792 Outcome,  $***p < 0.0001$ ) and D2-Cre (Bottom, Chi-square test with Bonferroni correction,  $\chi^2 = 40.37$ , ITI vs  
793 Cue,  $p > 0.9999$ ; ITI vs Outcome,  $***p < 0.0001$ ; Cue vs Outcome,  $***p < 0.0001$ ) mice.

794 (L) The fraction of Type I and Type II neurons in D1-Cre or D2-Cre mice. The fraction of Type II neurons in  
795 D2-Cre mice were significantly more than that in D1-Cre mice (Chi-square test,  $\chi^2 = 10.38$ ,  $**p = 0.0013$ ).

796

797 **Figure 5. More Non-Responsive D2-MSNs Acquire Error Responses than D1-MSNs through Learning**

798 (A) Representative image of contour map from novice (green) and expert (red).

799 (B) Averaged traces of an example neuron acquiring error response through learning. Averaged calcium traces  
800 of novices and experts in correct and error trials (Top). Area under the ROC curve (auROC) reflecting  
801 statistical difference between calcium trace of error and correct trials from novices and experts (Bottom).

802 (C) Averaged traces of an example neuron acquiring correct response through learning. Averaged calcium  
803 traces of novices and experts in correct and error trials (Top). Area under the ROC curve (auROC) reflecting  
804 statistical difference between calcium trace of error and correct trials from novices and experts (Bottom).

805 (D) Relationship between averaged auROC of novice and that of expert in D1-Cre (Left,  $n = 3$  mice) or  
806 D2-Cre mice (Middle,  $n = 3$  mice). Schematic of classification of neuron type (Right). I, Type I; II, Type II;  
807 N, Non-responsive.

808 (E) The fraction of each neuron type in D1-Cre (Left) and D2-Cre mice (Right).

809 (F) Non-responsive D2-MSN preferentially became Type I (Error Type) through learning (Left, Chi-square  
810 test,  $\chi^2 = 4.735$ ,  $*p = 0.0296$ ), while Non-responsive D1-MSN preferentially became Type II (Correct Type)  
811 through learning (Right, Chi-square test,  $\chi^2 = 6.105$ ,  $*p = 0.0135$ ).

812

813 **Supplementary Figure S1. Response Latencies Were Modulated by Recent History**

814 (A) The effects of recent history on response latencies in the VD-Attend task (unpaired t-test,  $t_{10} = 0.8115$ ,  $p =$   
815  $0.4359$ ).

816 (B) The effects of recent history on response latencies in the VD-Avoid task (unpaired t-test,  $t_{11} = 2.090$ ,  $p =$   
817  $0.0607$ ).

818

819 **Supplementary Figure S2. Cell Type Specific Gene Expression**

820 Representative coronal sections of DREADD expression in the D1-MSN or D2-MSN of the NAc (Left).

821 Representative coronal sections containing projection areas, ventral pallidum (VP, Middle) and substantia  
822 nigra pars reticulata (SNr, Right).

823

824 **Supplementary Figure S3. DREADD Suppression of D1-MSN in the NAc Decreases the Behavioral**  
825 **Performance in a Recent History Dependent Manner**

826 (A) DREADD suppression of D1-MSN in the NAc decreased the behavioral performance after correct trial in  
827 the VD-Attend task (Two-way RM-ANOVA with Sidak correction, Trial type  $\times$  Treatment interaction,  $F_{1,11} =$   
828 8.323,  $*p = 0.0148$ ; After Correct,  $**p = 0.0015$ ; After Error,  $p = 0.6357$ ).

829 (B) DREADD suppression of D1-MSN in the NAc decreased the behavioral performance after correct trial in  
830 the VD-Avoid task (Two-way RM-ANOVA with Sidak correction, Trial type  $\times$  Treatment interaction,  $F_{1,12} =$   
831 5.603,  $*p = 0.0356$ ; After Correct,  $*p = 0.0133$ ; After Error,  $p = 0.9990$ ).

832 (C) DREADD suppression of D2-MSN in the NAc did not affect the behavioral performance after correct or  
833 error trial in the VD-Attend task (Two-way RM-ANOVA with Sidak correction, Trial type  $\times$  Treatment  
834 interaction,  $F_{1,14} = 0.3984$ ,  $p = 0.5381$ ; After Correct,  $p = 0.7098$ ; After Error,  $p = 0.3406$ ).

835 (D) DREADD suppression of D2-MSN in the NAc decreased the behavioral performance after correct and  
836 error trial in the VD-Avoid task (Two-way RM-ANOVA with Sidak correction, Treatment effects,  $F_{1,14} =$   
837 29.79,  $***p < 0.0001$ ; After Correct,  $**p = 0.0012$ ; After Error,  $**p = 0.0014$ ).

838 (E) CNO treatment in D1/D2-mCherry did not affect the behavioral performance after correct or error trial in  
839 the VD-Attend task (Two-way RM-ANOVA with Sidak correction, Trial type  $\times$  Treatment interaction,  $F_{1,12} =$   
840 1.058,  $p = 0.3239$ ; After Correct,  $p = 0.8609$ ; After Error,  $p = 0.6787$ ).

841 (F) CNO treatment in D1/D2-mCherry did not affect the behavioral performance after correct or error trial in  
842 the VD-Avoid task (Two-way RM-ANOVA with Sidak correction, Trial type  $\times$  Treatment interaction,  $F_{1,12} =$   
843 0.001573,  $p = 0.9690$ ; After Correct,  $p = 0.7057$ ; After Error,  $p = 0.7319$ ).

844

845 **Supplementary Figure S4. Optic Fiber Placement**

846 Histology on optic fiber placement.

847

848 **Supplementary Figure S5. Optogenetic Suppression of D2-MSN in the NAc During ITI or Cue Period**

849 **Does Not affect the Behavioral Performance in a Recent History Dependent Manner**

850 (A) Optogenetic suppression of D2-MSN in the Nac during ITI period did not affect the behavioral

851 performance after correct or error trial in the VD-Avoid task (Two-way RM-ANOVA with Sidak correction,

852 Treatment effects,  $F_{1,8} = 1.015$ ,  $p = 0.3433$ ; After Correct,  $p = 0.9990$ ; After Error,  $p = 0.3294$ ).

853 (B) Light stimulation in D2-eYFP during ITI period did not affect the behavioral performance after correct or

854 error trial in the VD-Avoid task (Two-way RM-ANOVA with Sidak correction, Trial type  $\times$  Treatment

855 interaction,  $F_{1,7} = 2.535$ ,  $p = 0.1554$ ; After Correct,  $p = 0.9265$ ; After Error,  $p = 0.1910$ ).

856 (C) Optogenetic suppression of D2-MSN in the NAc during Cue period did not affect the behavioral

857 performance after correct or error trial in the VD-Avoid task (Two-way RM-ANOVA with Sidak correction,

858 Treatment effects,  $F_{1,8} = 0.7479$ ,  $p = 0.4123$ ; After Correct,  $p = 0.9760$ ; After Error,  $p = 0.3471$ ).

859 (D) Light stimulation in D2-eYFP during Cue period did not affect the behavioral performance after correct or

860 error trial in the VD-Avoid task (Two-way RM-ANOVA with Sidak correction, Trial type  $\times$  Treatment

861 interaction,  $F_{1,7} = 1.224$ ,  $p = 0.3051$ ; After Correct,  $p = 0.9961$ ; After Error,  $p = 0.3302$ ).

862

863 **Supplementary Figure S6. Optogenetic Suppression of D2-MSN in the NAc During Outcome Period**

864 **After Error Selectively Decreases Response Latency**

865 (A) Optogenetic suppression of D2-MSN in the NAc during ITI period did not affect response latencies after

866 correct or error trial in the VD-Avoid task (Two-way RM-ANOVA with Sidak correction, Treatment effects,

867  $F_{1,8} = 0.01032$ ,  $p = 0.9216$ ; After Correct,  $p = 0.1918$ ; After Error,  $p = 0.1553$ ).

868 (B) Light stimulation in D2-eYFP during ITI period did not affect response latencies after correct or error trial

869 in the VD-Avoid task (Two-way RM-ANOVA with Sidak correction, Trial type  $\times$  Treatment interaction,  $F_{1,7} =$

870  $0.1309$ ,  $p = 0.7281$ ; After Correct,  $p = 0.9493$ ; After Error,  $p = 0.9732$ ).

871 (C) Optogenetic suppression of D2-MSN in the NAc during Cue period did not affect response latencies after

872 correct or error trial in the VD-Avoid task (Two-way RM-ANOVA with Sidak correction, Treatment effects,

873  $F_{1,8} = 1.331$ ,  $p = 0.2820$ ; After Correct,  $p = 0.8452$ ; After Error,  $p = 0.1203$ ).

874 (D) Light stimulation in D2-eYFP during Cue period did not affect response latencies after correct or error trial  
875 in the VD-Avoid task (Two-way RM-ANOVA with Sidak correction, Trial type  $\times$  Treatment interaction,  $F_{1,7} =$   
876  $0.0003527$ ,  $p = 0.9855$ ; After Correct,  $p = 0.9046$ ; After Error,  $p = 0.9158$ ).

877 (E) Optical stimulation of D2-MSN in the NAc during Outcome period after error response decreased response  
878 latencies in the next trial of the VD-Avoid task (Two-way RM-ANOVA with Sidak correction, Treatment  
879 effects,  $F_{1,8} = 23.51$ ,  $**p = 0.0013$ ; After Correct,  $p = 0.9716$ ; After Error,  $***p = 0.0003$ ).

880 (F) Light stimulation in D2-eYFP during Outcome period did not affect response latencies after correct or error  
881 trial in the VD-Avoid task (Two-way RM-ANOVA with Sidak correction, Trial type  $\times$  Treatment interaction,  
882  $F_{1,7} = 0.4414$ ,  $p = 0.5277$ ; After Correct,  $p = 0.7563$ ; After Error,  $p = 0.9668$ ).

883

#### 884 **Supplementary Figure S7. GRIN Lens Placement**

885 Histology on GRIN lens placement.

886

#### 887 **Supplementary Figure S8. Histograms of auROC During ITI, Cue, and Outcome Period**

888 (A - C) Histogram of averaged auROC of D1-MSN during ITI (A), Cue (B), and Outcome (C) period.

889 (D - F) Histogram of averaged auROC of D2-MSN during ITI (D), Cue (E), and Outcome (F) period.

890

#### 891 **Supplementary Figure S9. Averaged Calcium Traces from Responsive Type I and Type II Neurons of**

#### 892 **D1-Cre and D2-Cre mice**

893 (A) Averaged traces of all responsive Type I neurons in D1-Cre mice ( $n = 35$ ).

894 (B) Averaged traces of all responsive Type II neurons in D1-Cre mice ( $n = 38$ ).

895 (C) Averaged traces of all responsive Type I neurons in D2-Cre mice ( $n = 43$ ).

896 (D) Averaged traces of all responsive Type II neurons in D2-Cre mice ( $n = 15$ ).

897 (E) A scatterplot of individual D1-MSN or D2-MSN responses during Outcome period.

898 (F) Averaged auROC traces of all responsive Type I neurons in D1-Cre and D2-Cre mice.

899 (G) Early responses (2.0 – 5.0 sec) of all responsive Type I (unpaired t-test,  $t_{76} = 1.289$ ,  $p = 0.2014$ ).

900 (H) Late responses (7.0 – 10.0 sec) of all responsive Type I (unpaired t-test,  $t_{76} = 2.373$ ,  $*p = 0.0202$ ).



901 (I) Averaged auROC traces of all responsive Type II neurons in D1-Cre and D2-Cre mice.

902 (J) Early responses (2.0 – 5.0 sec) of all responsive Type II (unpaired t-test,  $t_{51} = 0.9313$ ,  $p = 0.3561$ ).

903 (K) Late responses (7.0 – 10.0 sec) of all responsive Type II (unpaired t-test,  $t_{51} = 0.1162$ ,  $p = 0.9080$ ).

904

905 **Supplementary Figure S10. Neurons of the Same Type Stays Closer to Each Other than Neurons of**  
906 **Different Type in D2-MSN**

907 (A and B) Spatial mapping of individual type neurons from representative D1-Cre (A) or D2-Cre (B) mice.

908 (C and D) Quantification of the pairwise distances of each types of neurons in D1-Cre (C, KS test,  $p = 0.4503$ )

909 or D2-Cre (D, KS test,  $p = 0.5357$ ) mice.

910 (E and F) Quantification of the pairwise distances of different types of neurons in D1-Cre (E, KS test,  $p =$

911  $0.2519$ ) or D2-Cre (F, KS test,  $***p = 0.0002$ ) mice.

912

913 **Supplementary Figure S11. The Behavioral Performance of Novice and Expert Mice**

914 Behavioral performances were improved through learning (Two-way RM-ANOVA with Sidak correction,

915 Learning effects,  $F_{1,4} = 23.33$ ,  $**p = 0.0085$ ; Novice,  $p = 0.3465$ ; Expert,  $p = 0.8630$ ).

916

917 **Supplementary Figure S12. Averaged auROC Traces of Each Type Neuron Through Learning**

918 (A) Averaged auROC traces of neurons becoming responsive Type I from non-responsive type neuron in D1-

919 Cre mice (Left). Averaged auROC in expert mice was significantly higher than that in novice mice (Right,

920 paired-test,  $t_6 = 10.22$ ,  $***p < 0.0001$ ).

921 (B) Averaged auROC traces of neurons becoming responsive Type II from non-responsive type neuron in D1-

922 Cre mice (Left). Averaged auROC in expert mice was significantly lower than that in novice mice (Right,

923 paired-test,  $t_{13} = 8.766$ ,  $***p < 0.0001$ ).

924 (C) Averaged auROC traces of neurons becoming responsive Type I from non-responsive type neuron in D2-

925 Cre mice (Left). Averaged auROC in expert mice was significantly higher than that in novice mice (Right,

926 paired-test,  $t_{21} = 7.782$ ,  $***p < 0.0001$ ).

927 (D) Averaged auROC traces of neurons becoming responsive Type II from non-responsive type neuron in D2-  
928 Cre mice (Left). Averaged auROC in expert mice was significantly lower than that in novice mice (Right,  
929 paired-test,  $t_4 = 3.841$ ,  $*p = 0.0184$ ).

930

931 **Supplementary Movie 1. Calcium Imaging from Mice Performing the VD-Avoid Task in Correct Trial**

932

933 **Supplementary Movie 2. Calcium Imaging from Mice Performing the VD-Avoid Task in Error Trial**

934

935

# Figure 1 Nishioka et al.

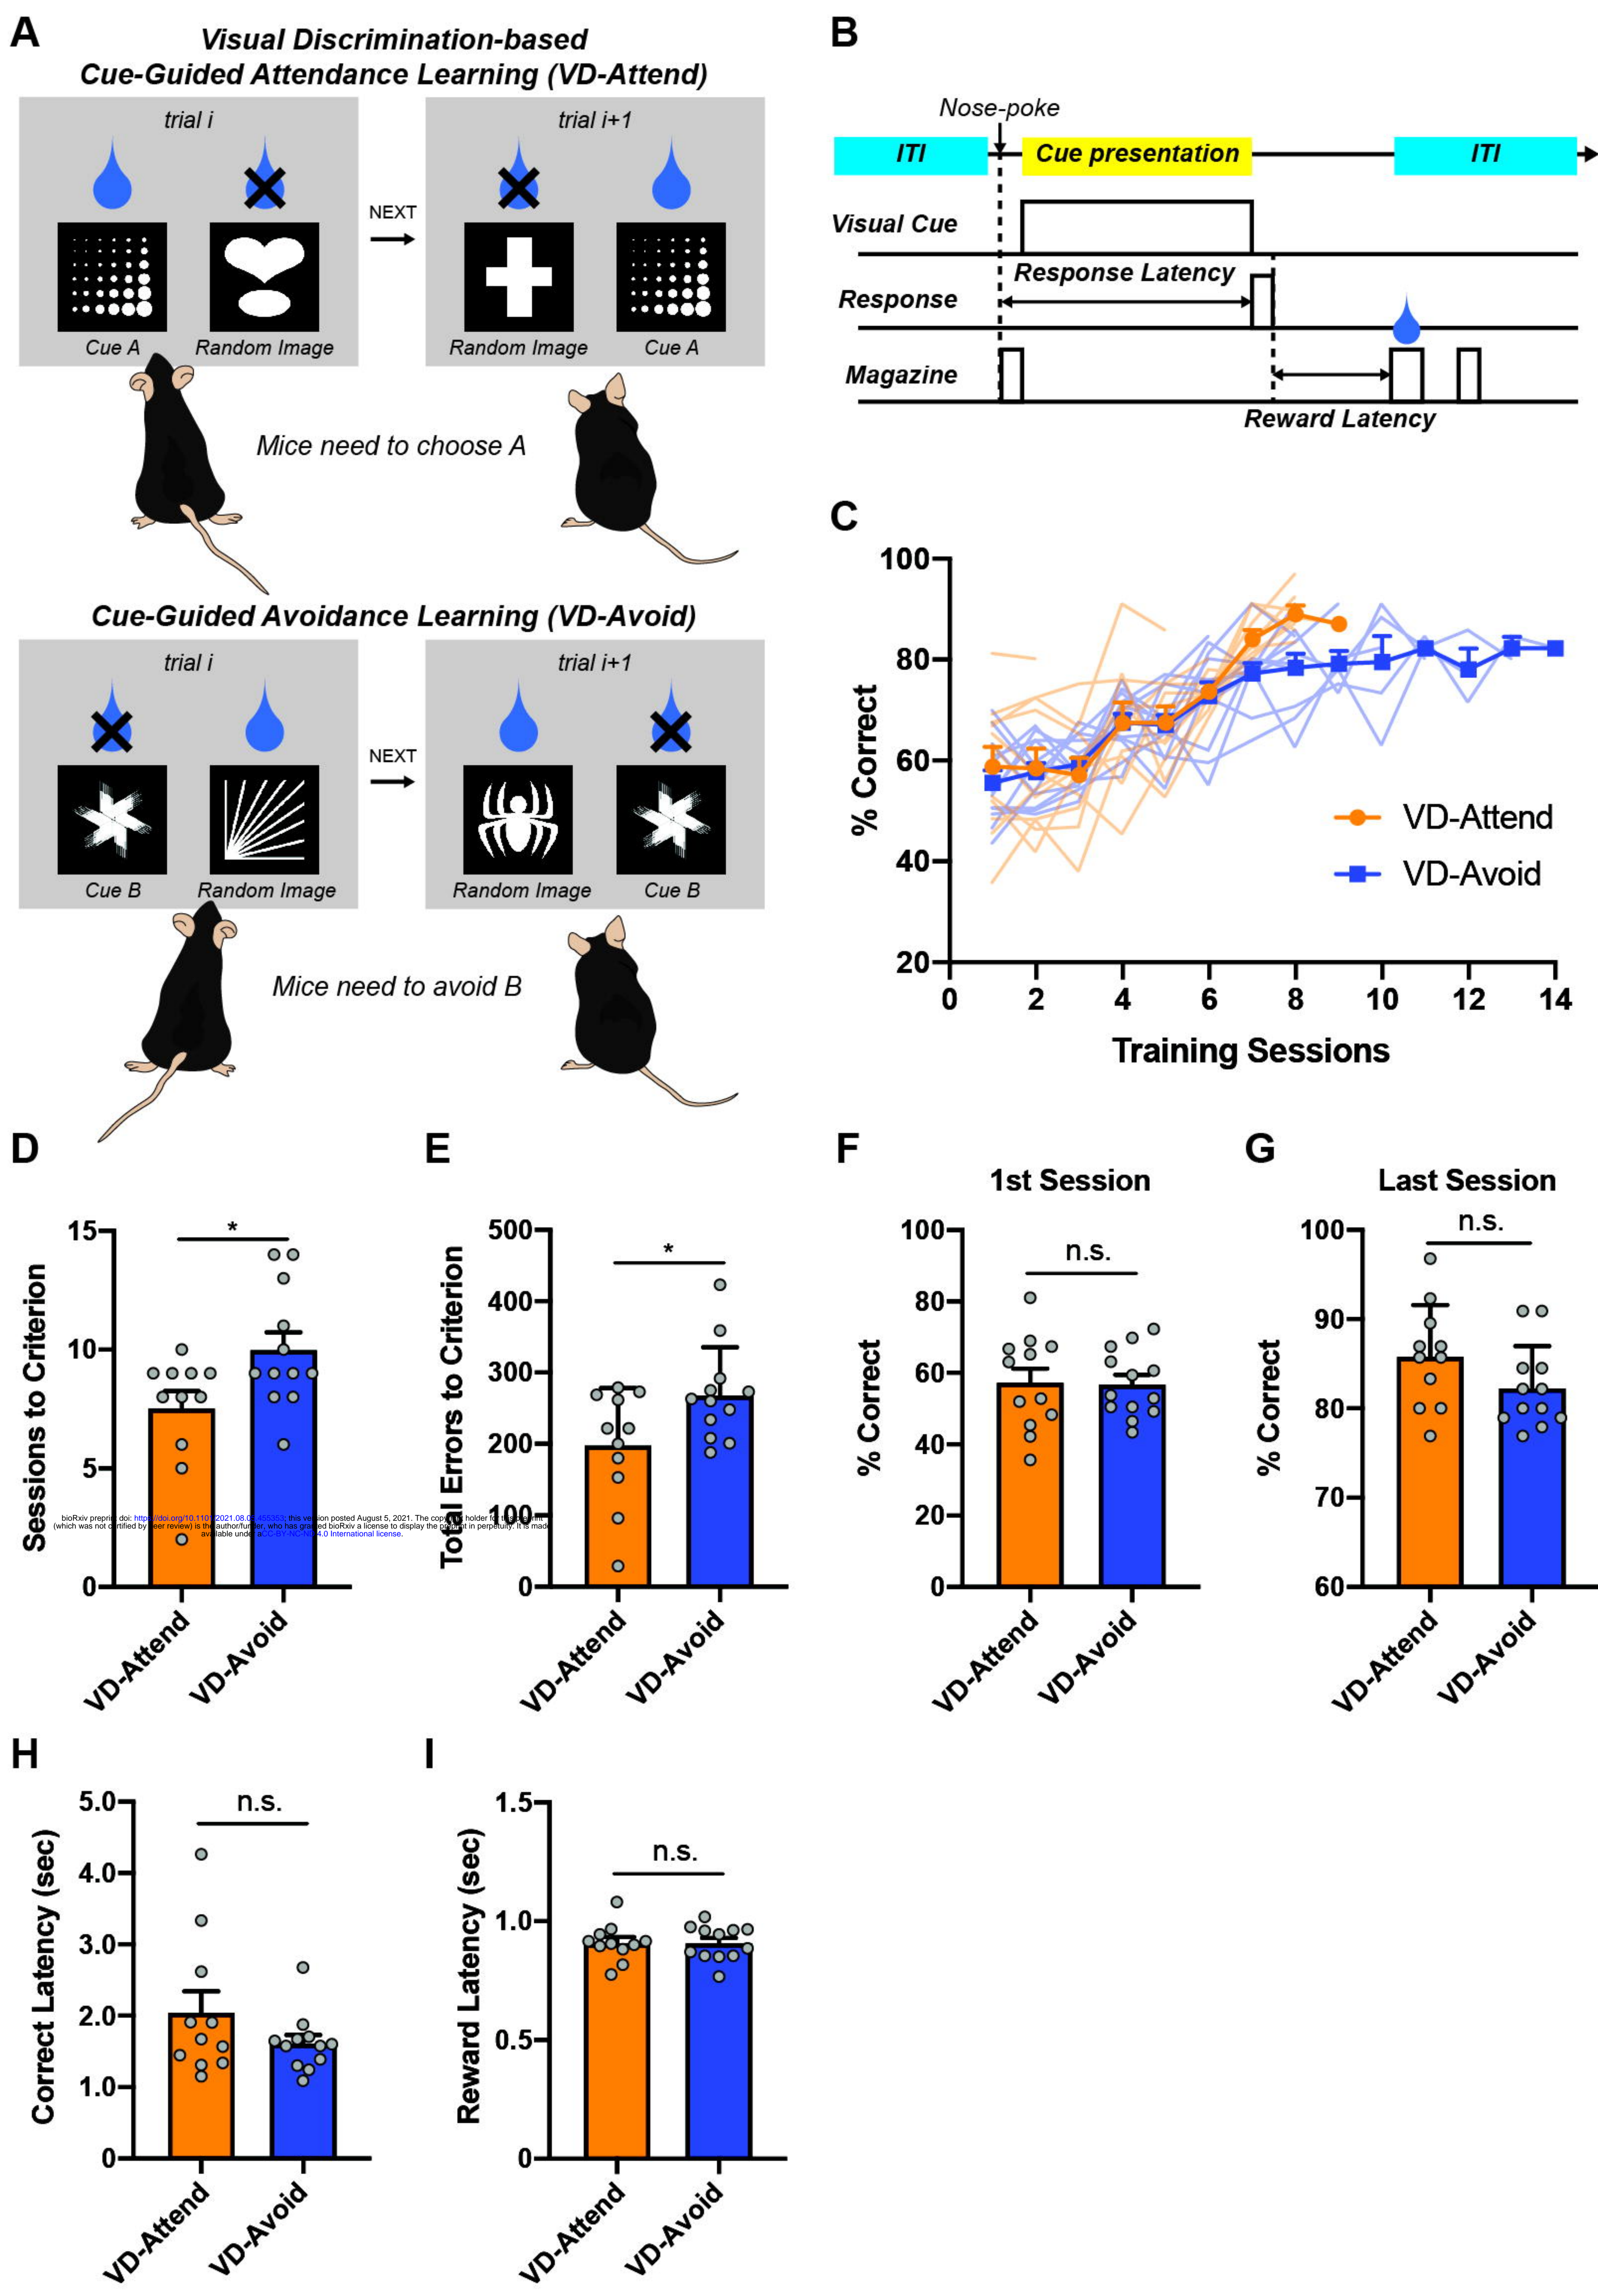

# Figure 2 Nishioka et al.

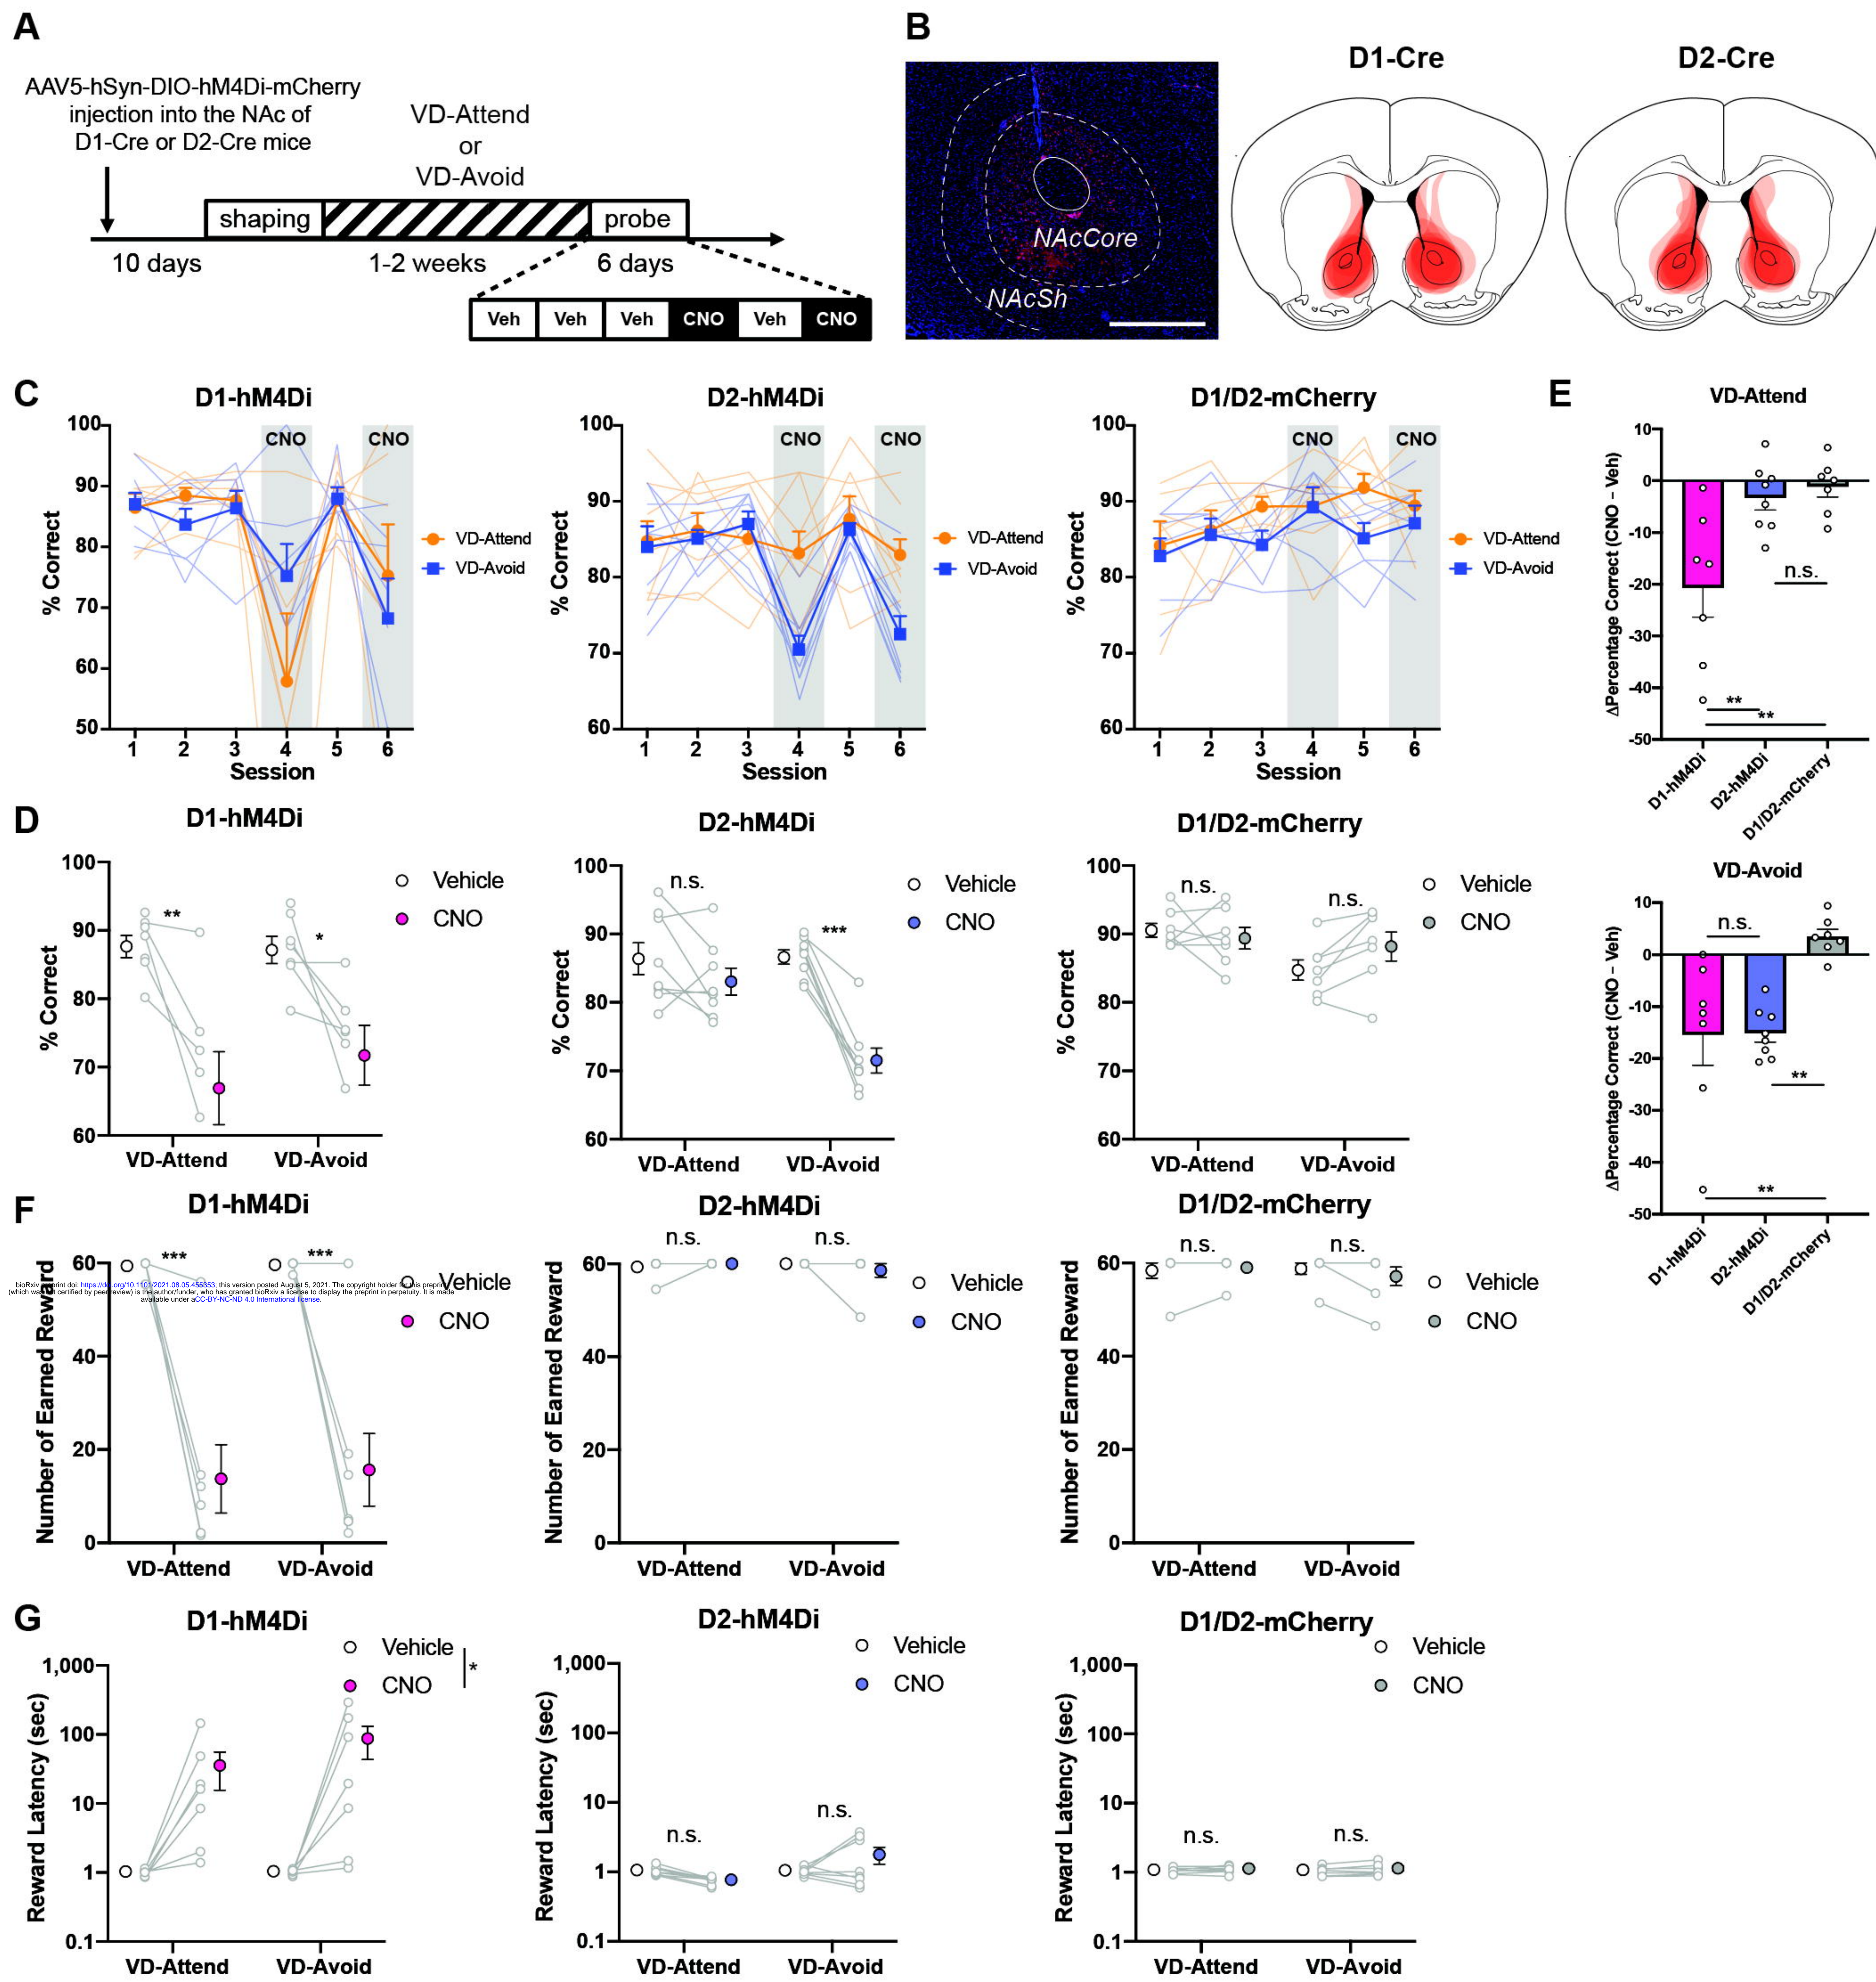

# Figure 3 Nishioka et al.

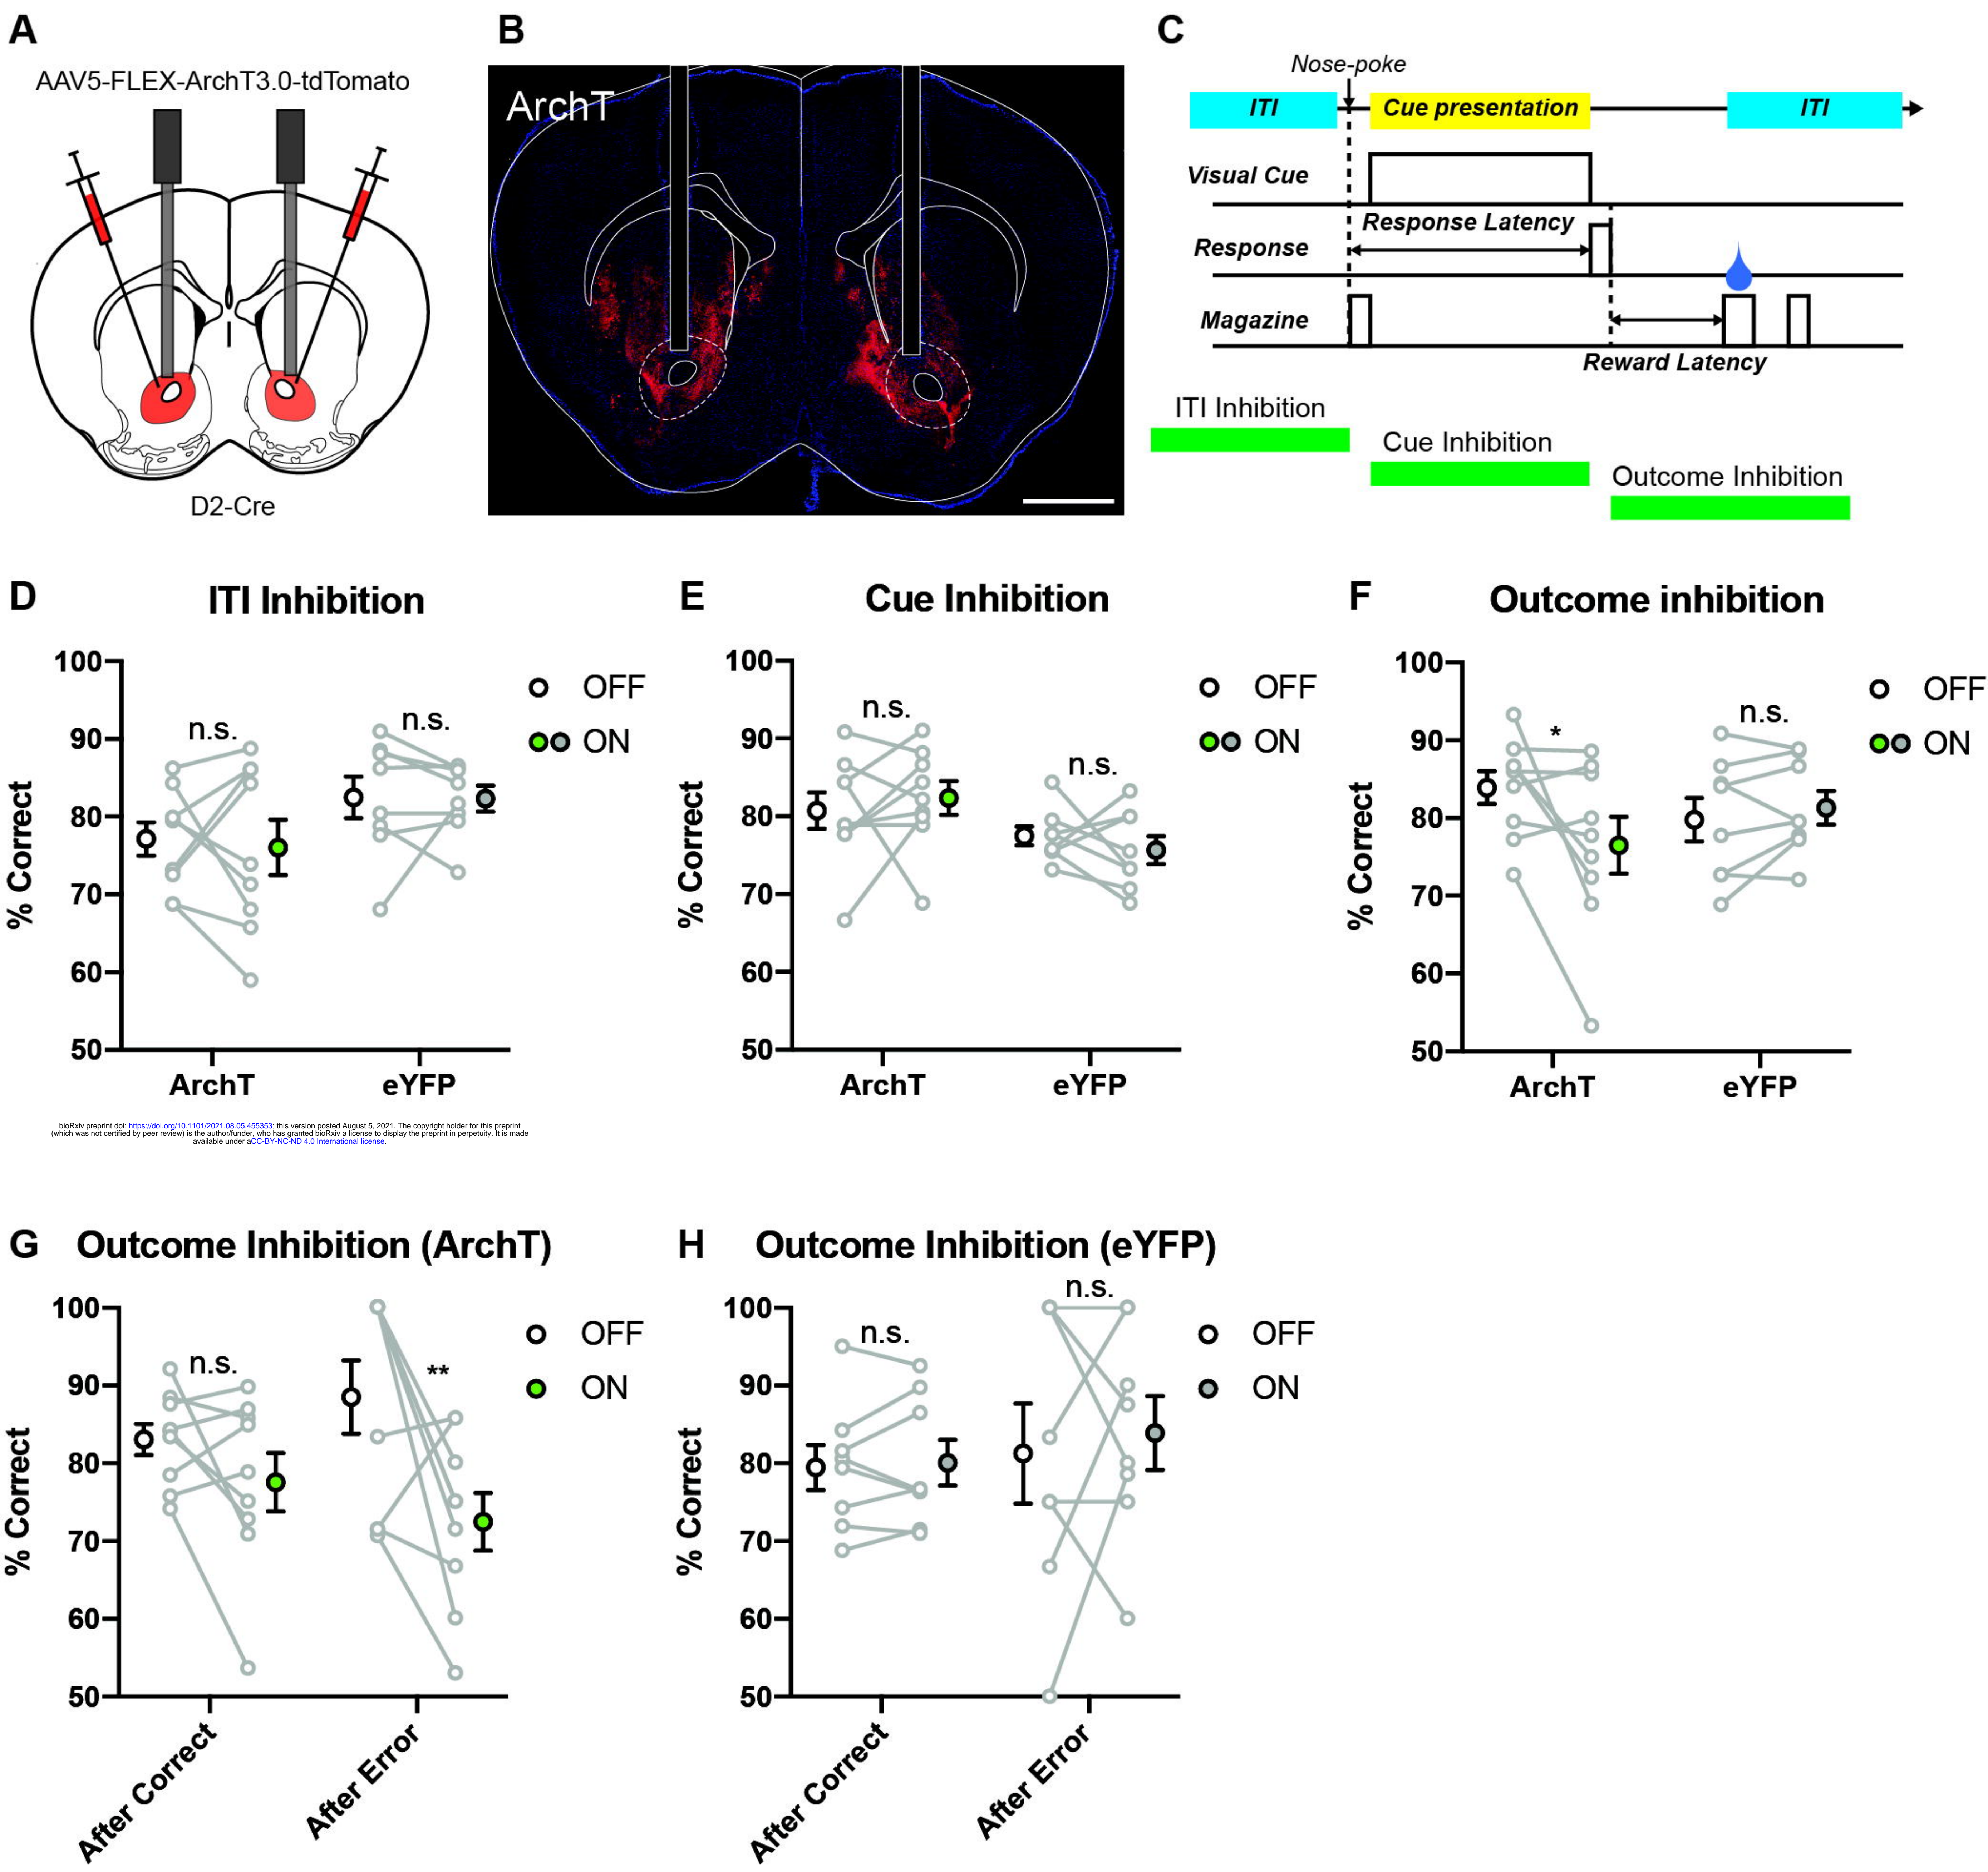

# Figure 4 Nishioka et al.

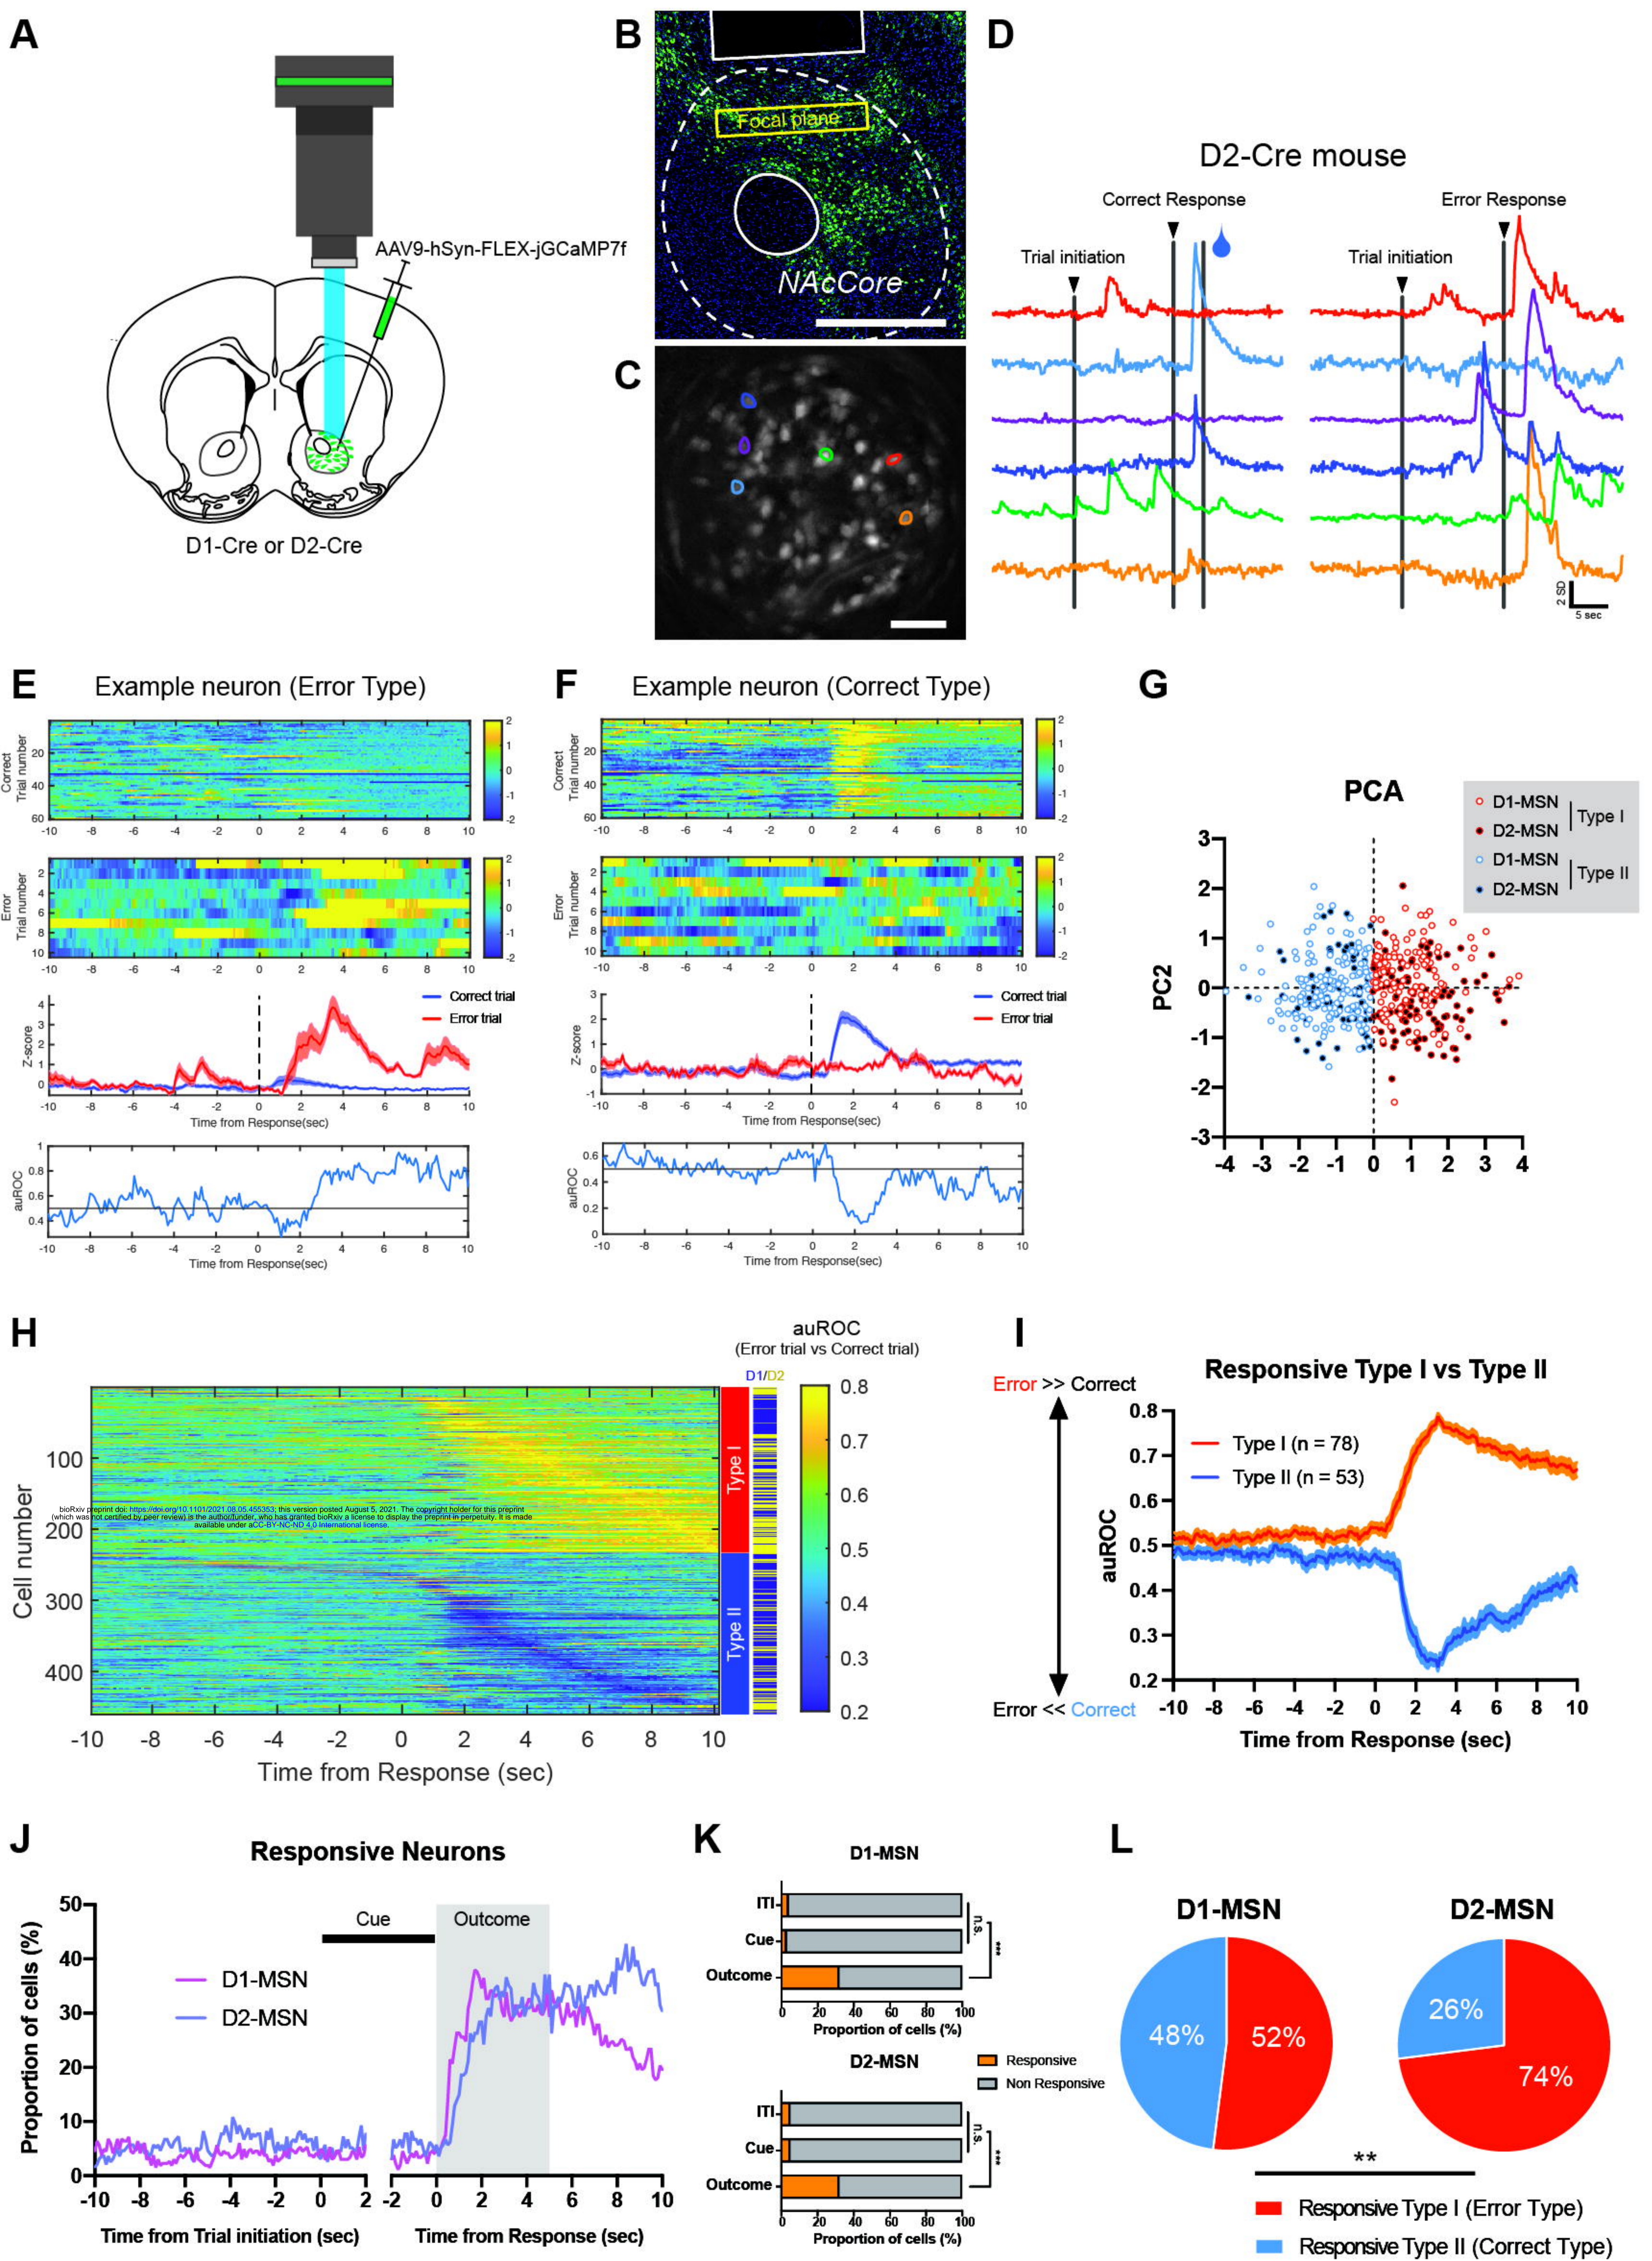

# Figure 5 Nishioka et al.

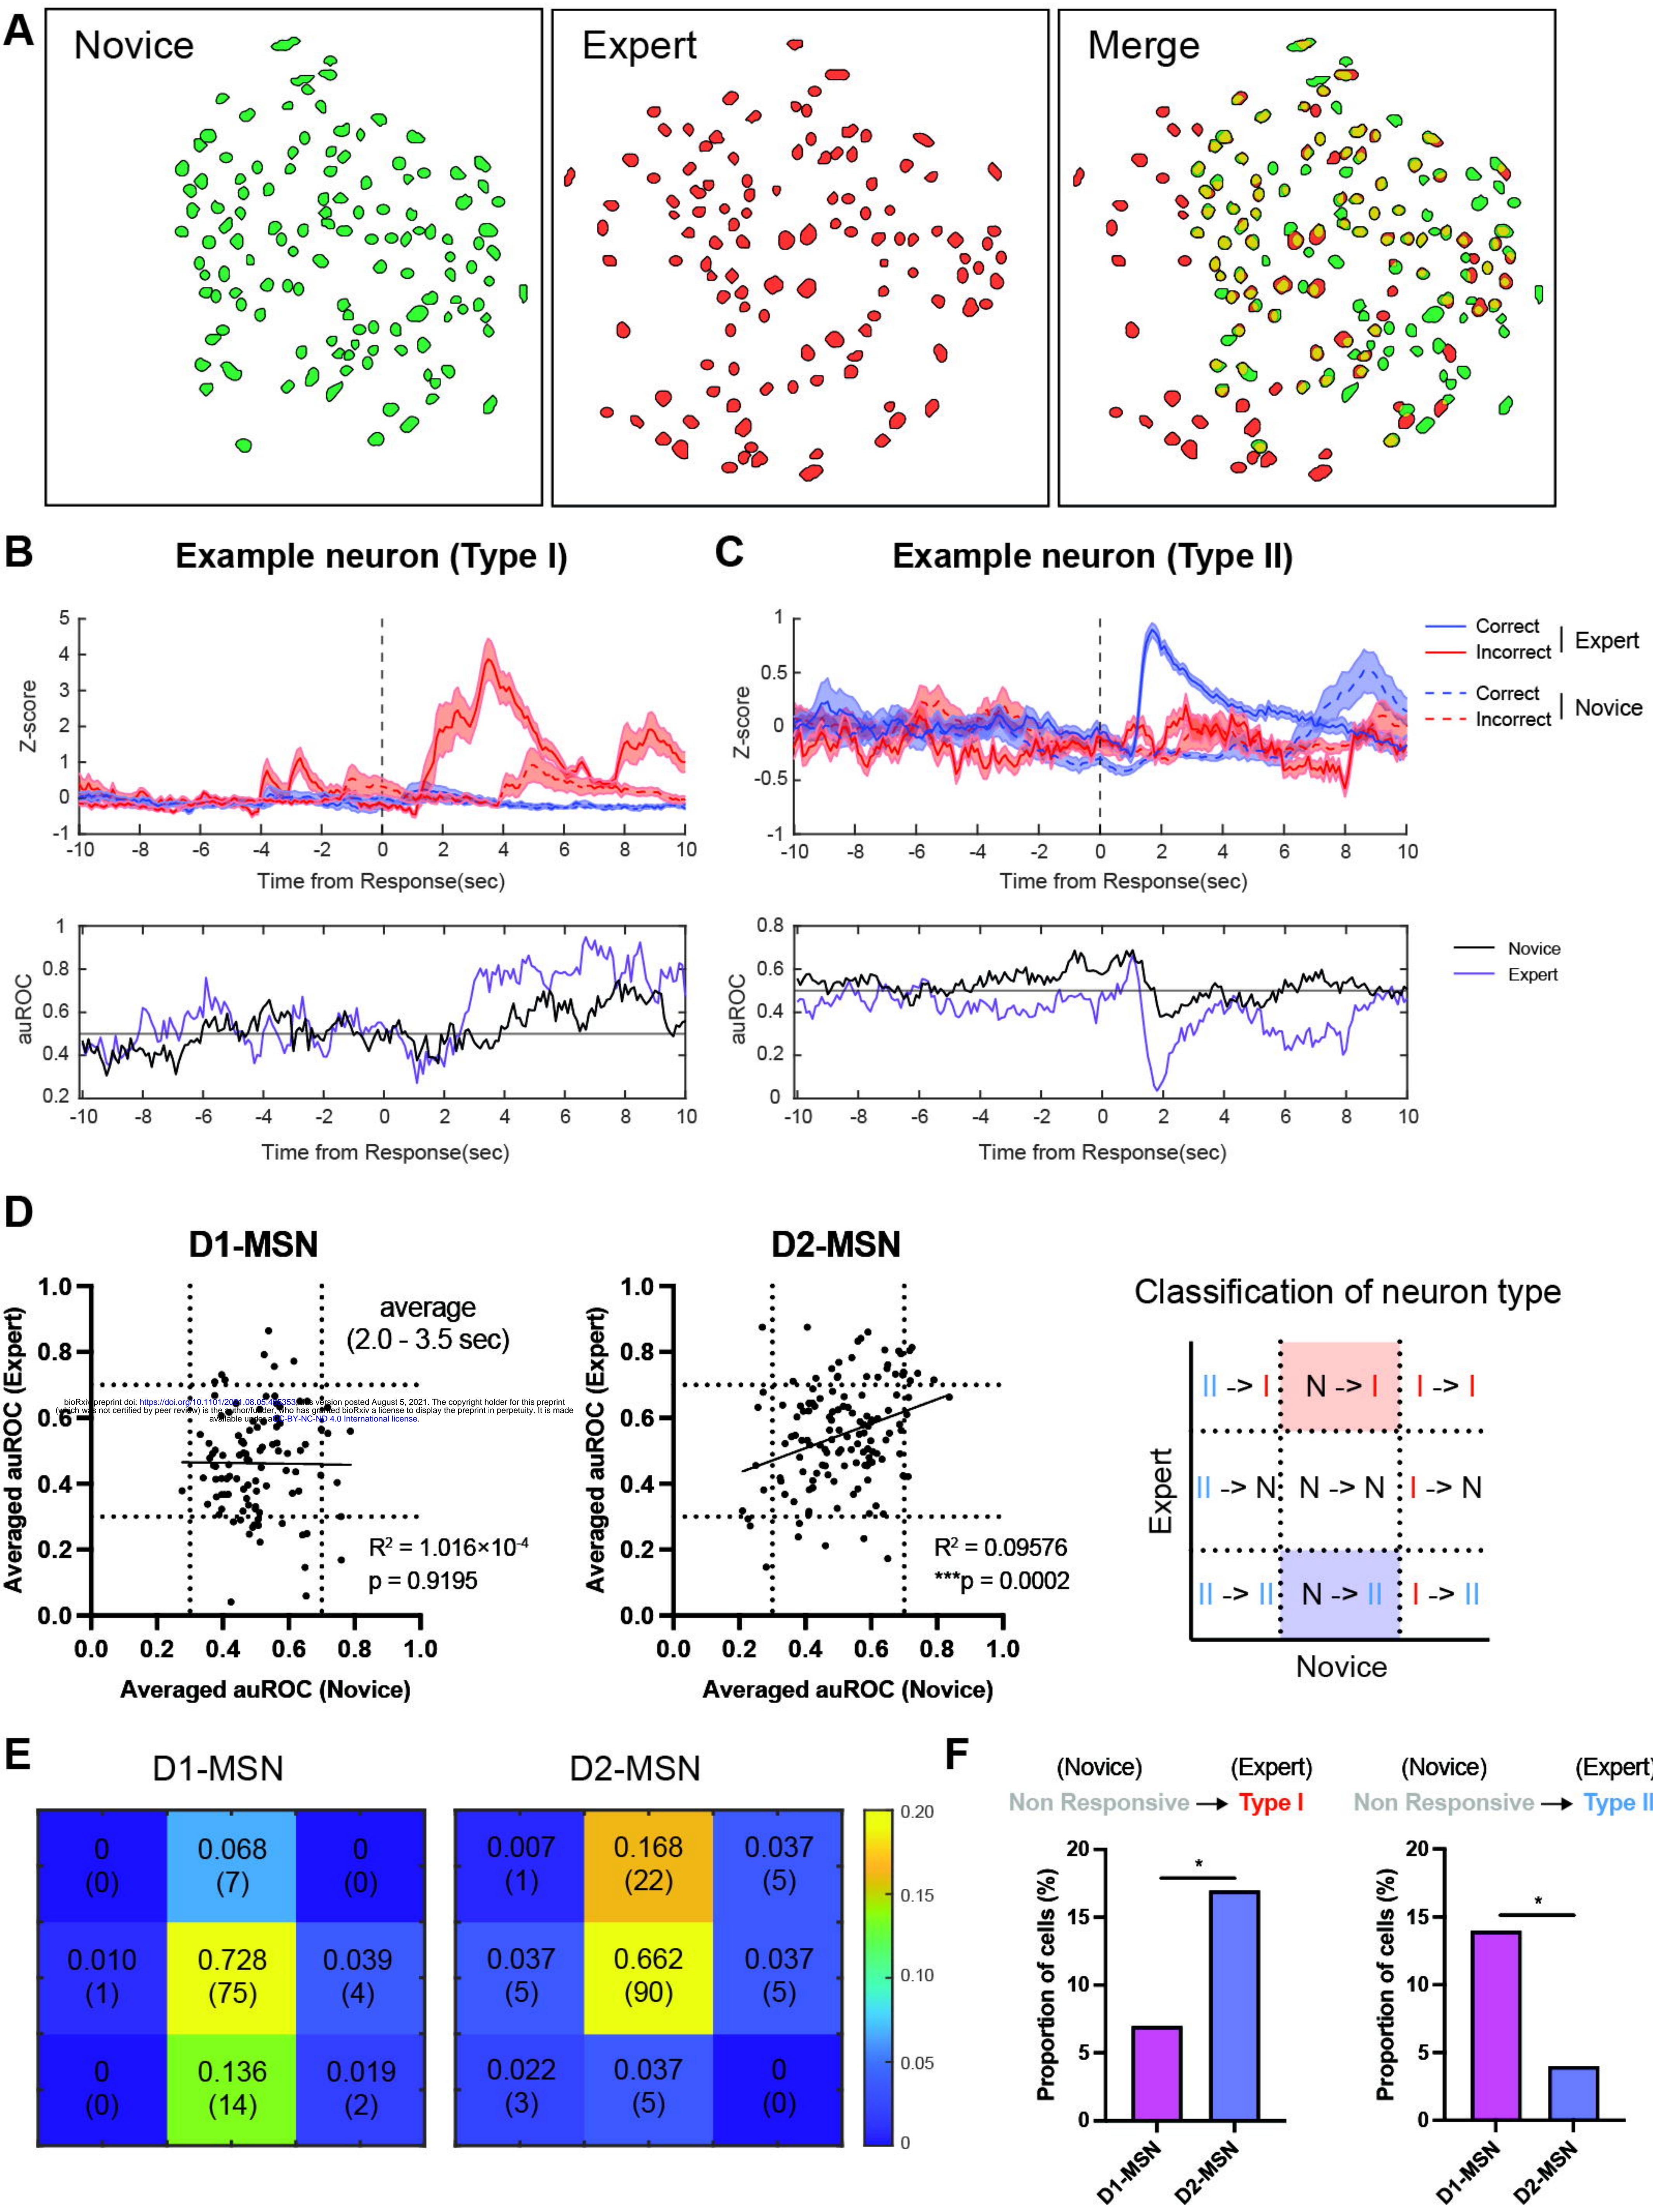

# Supplementary Figure S1 Nishioka et al.

bioRxiv preprint doi: <https://doi.org/10.1101/2021.08.05.455353>; this version posted August 5, 2021. The copyright holder for this preprint (which was not certified by peer review) is the author/funder, who has granted bioRxiv a license to display the preprint in perpetuity. It is made available under aCC-BY-NC-ND 4.0 International license.

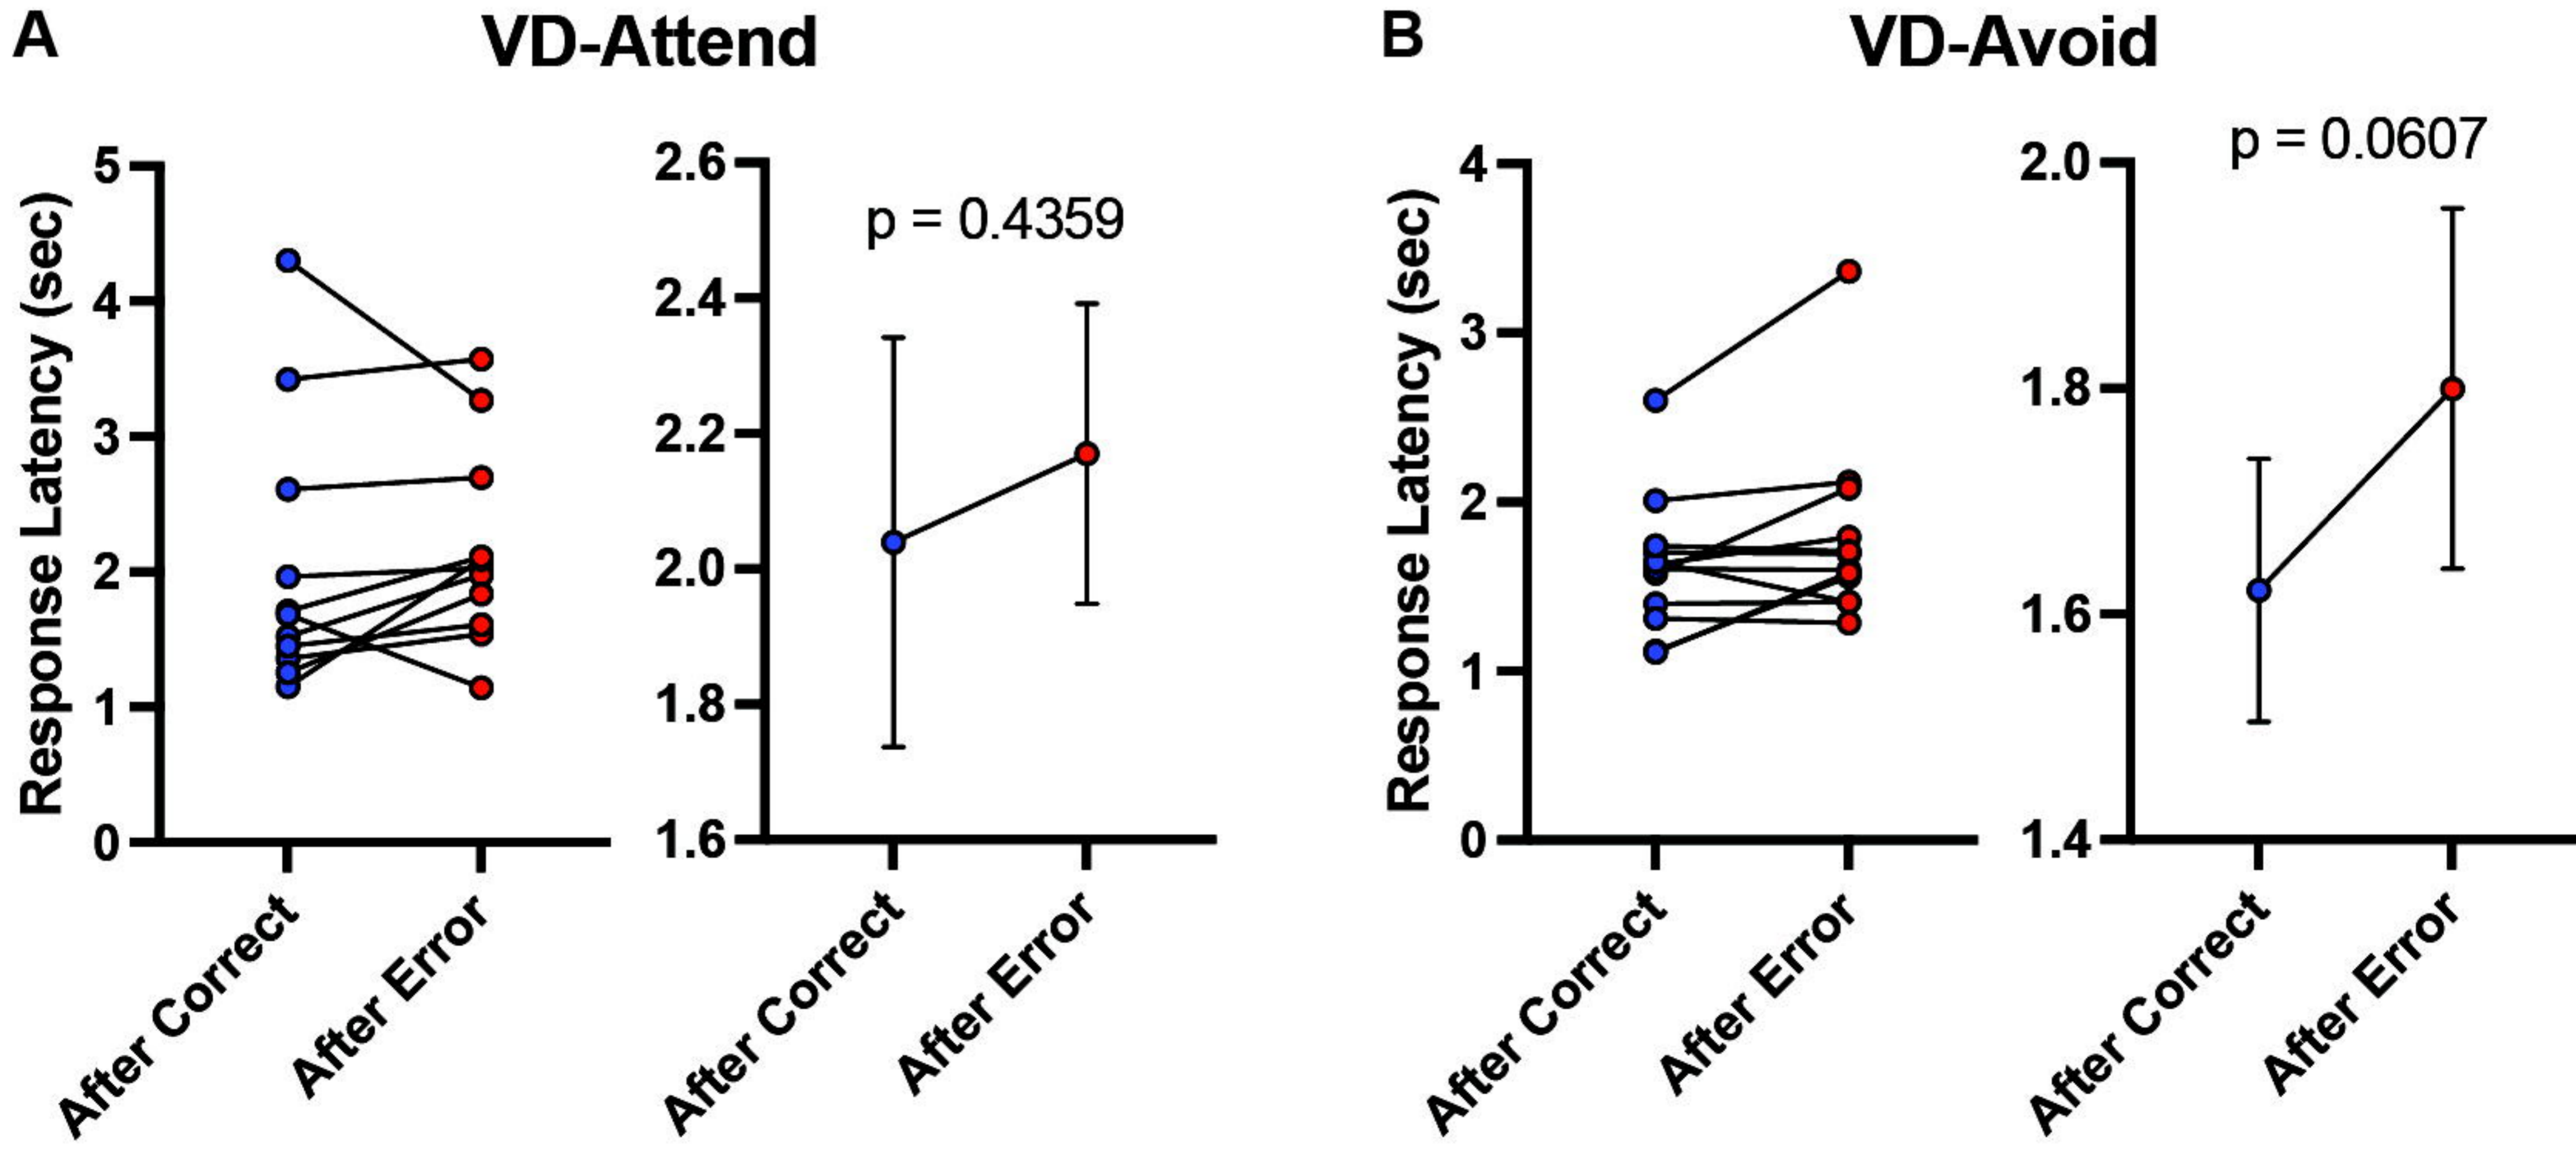



# Supplementary Figure S2 Nishioka et al.

Bregma 1.18 mm

Bregma 0.14 mm

Bregma -3.08 mm

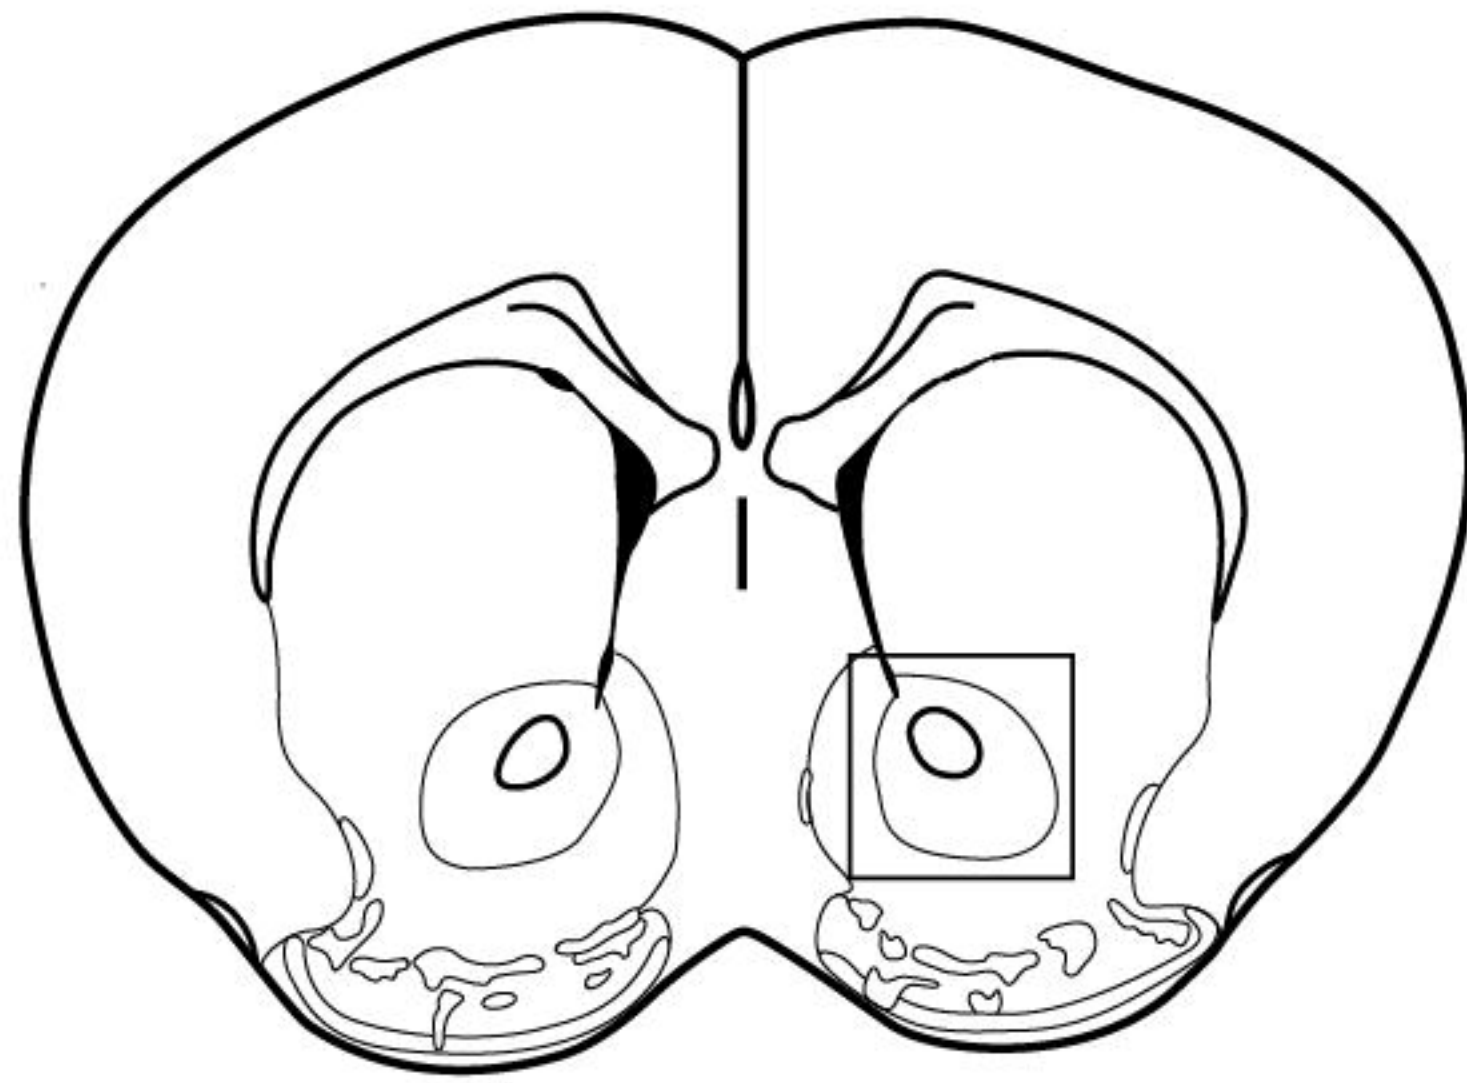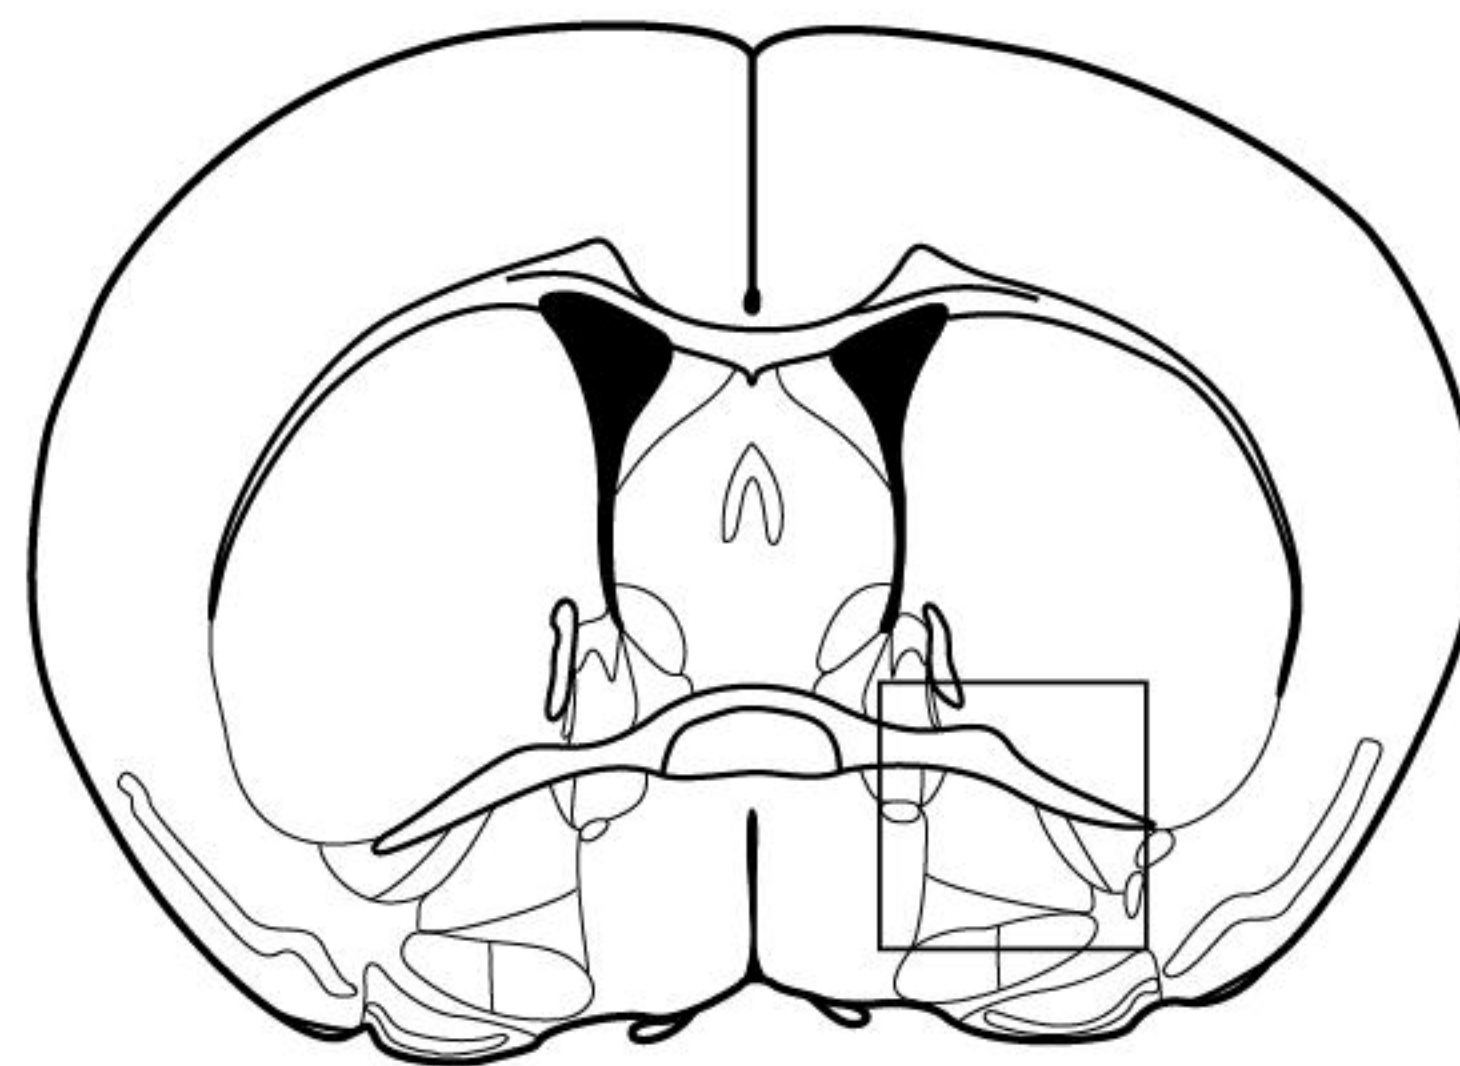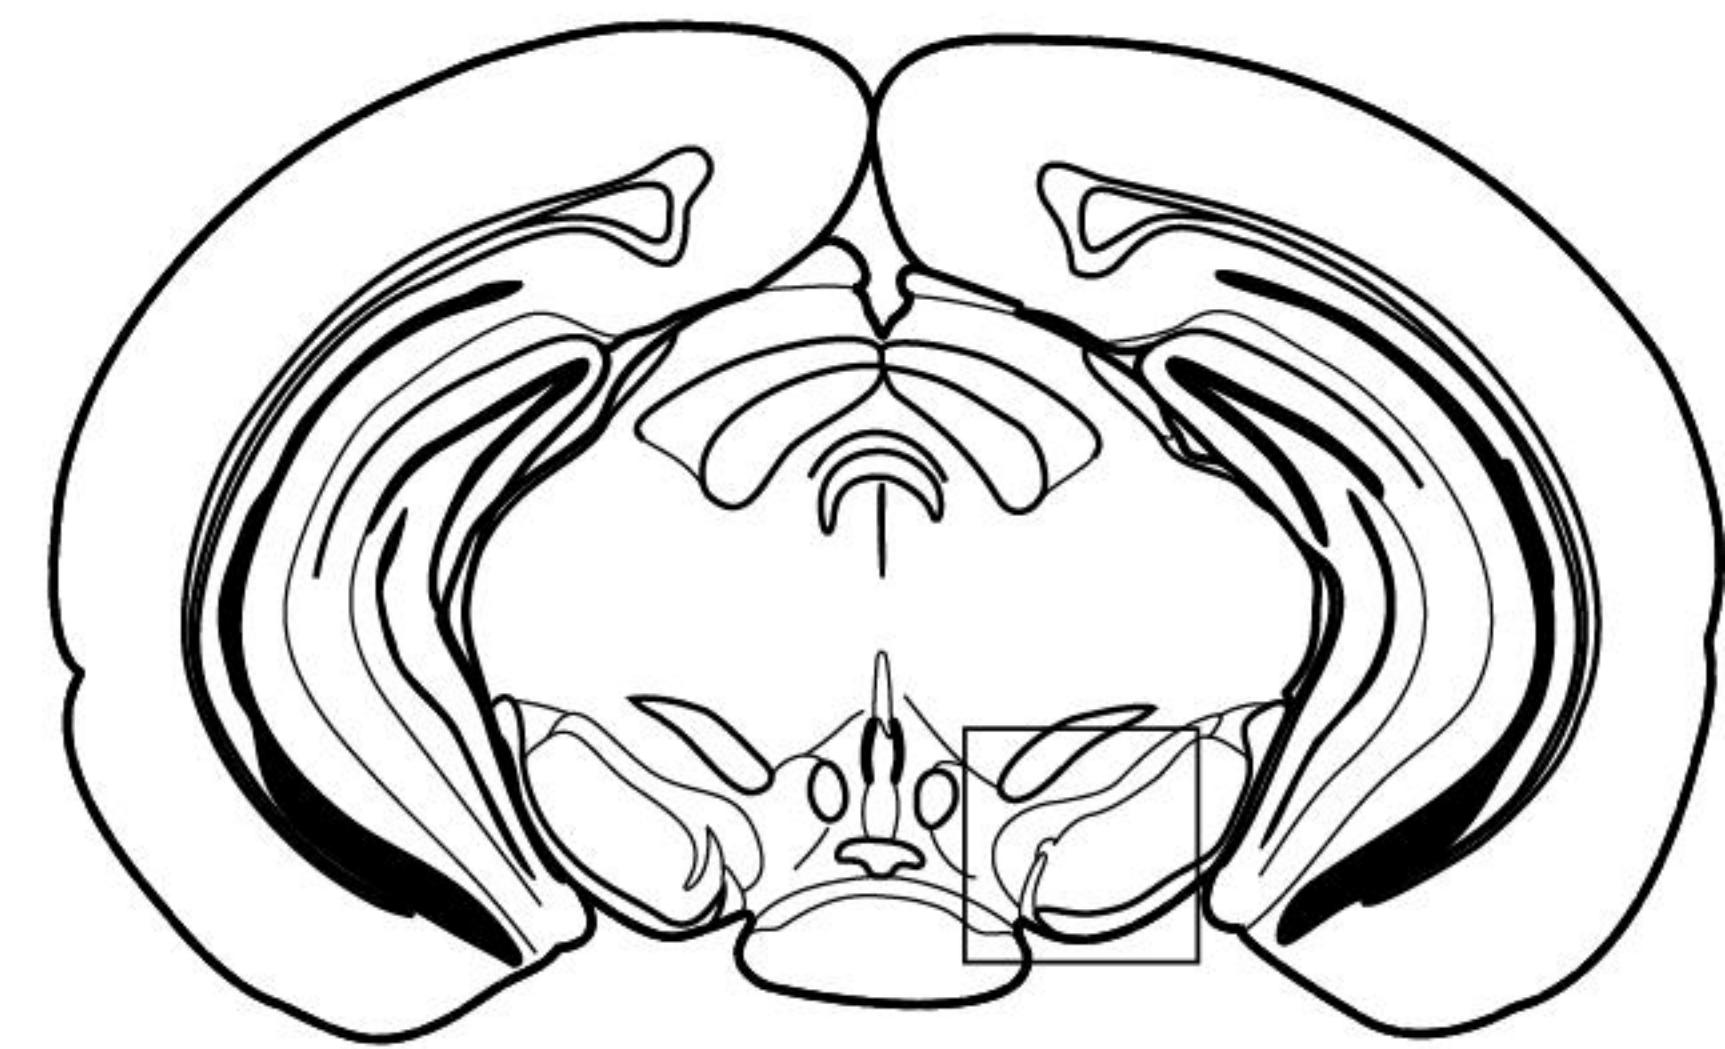

D1-Cre

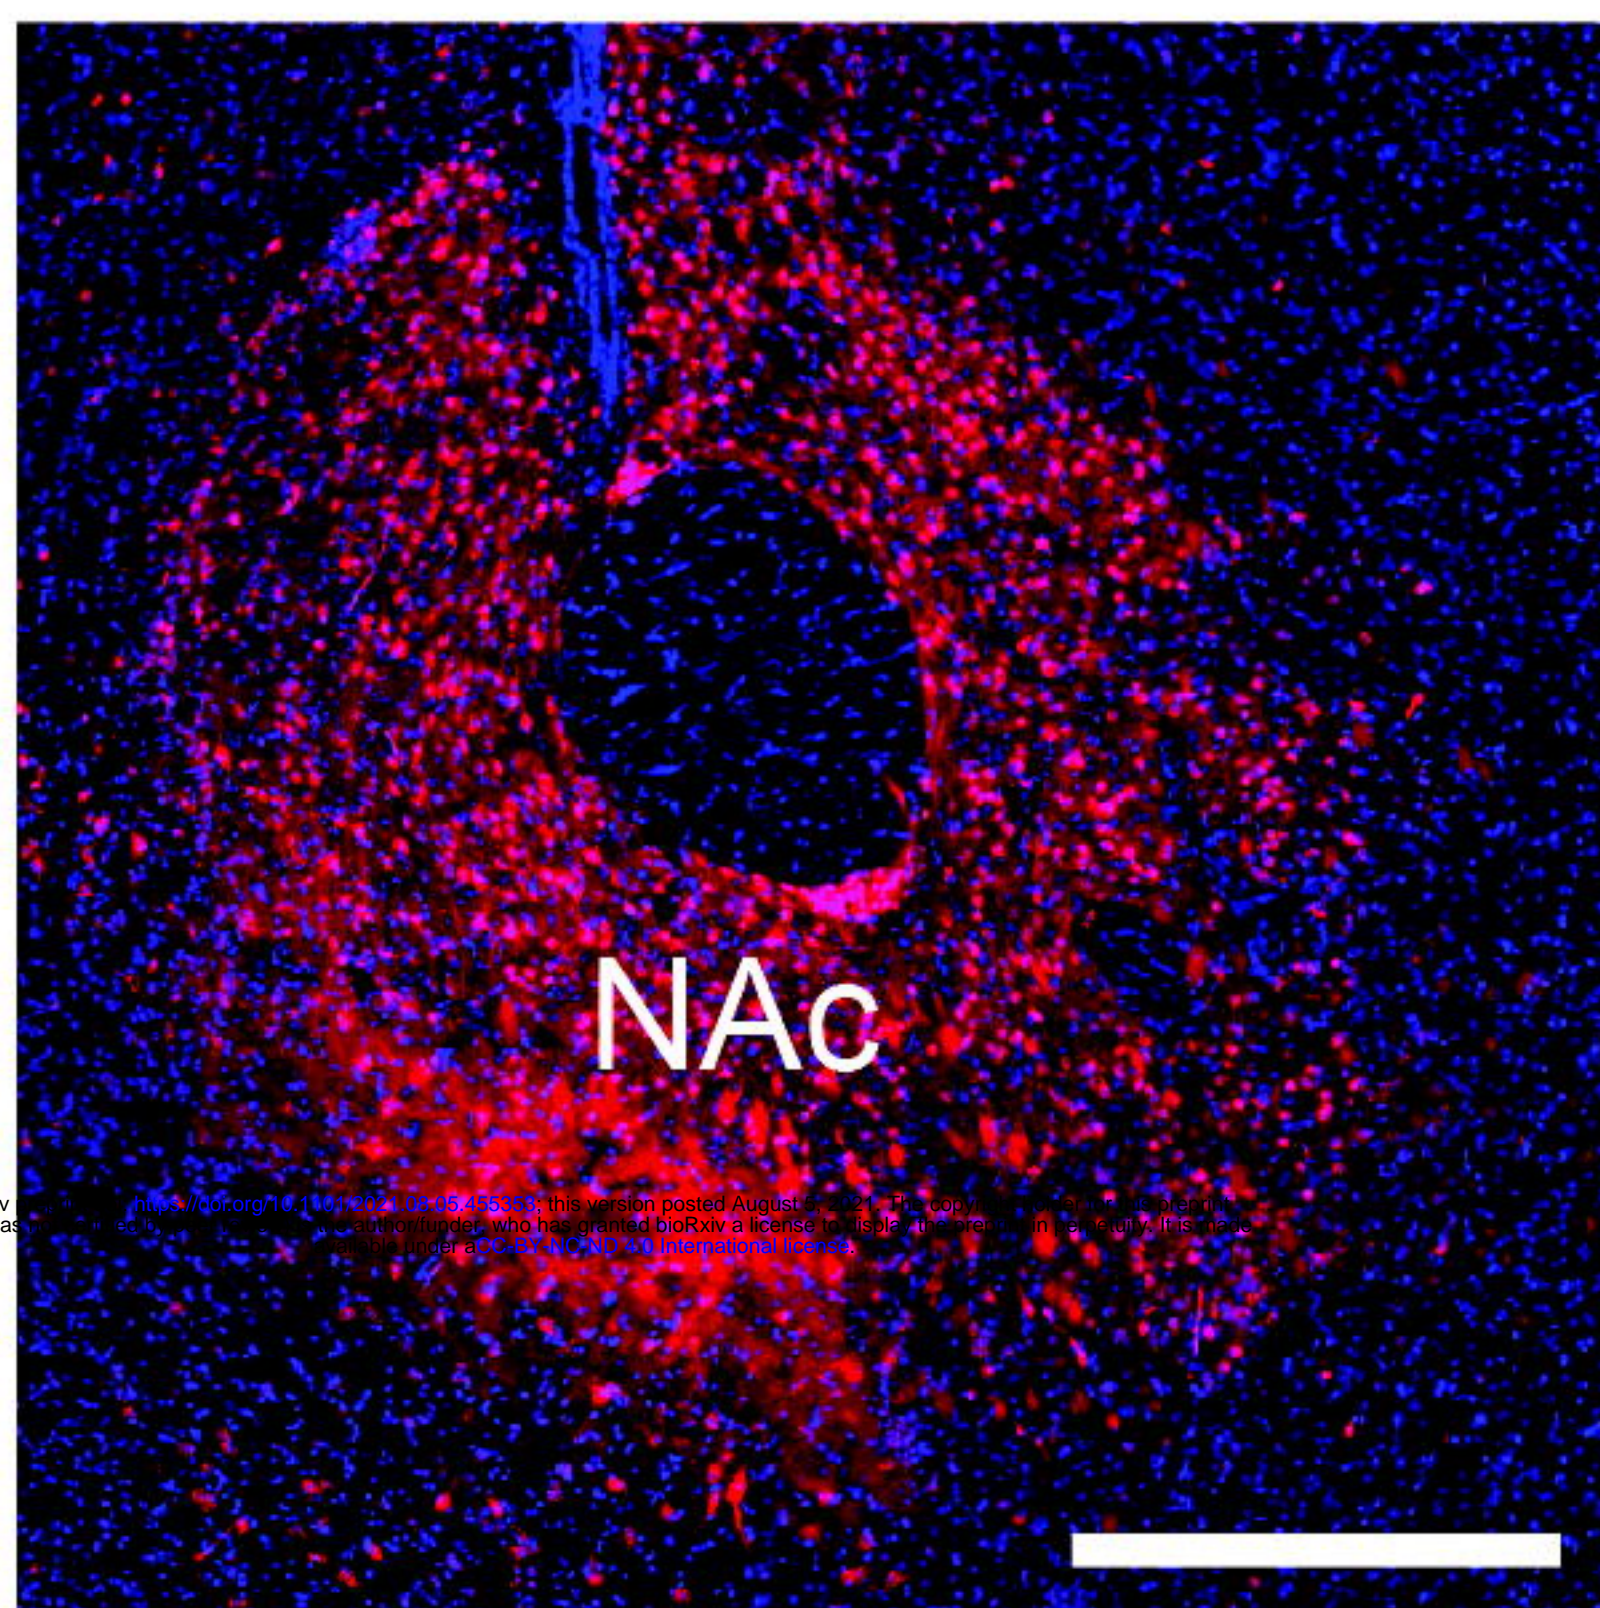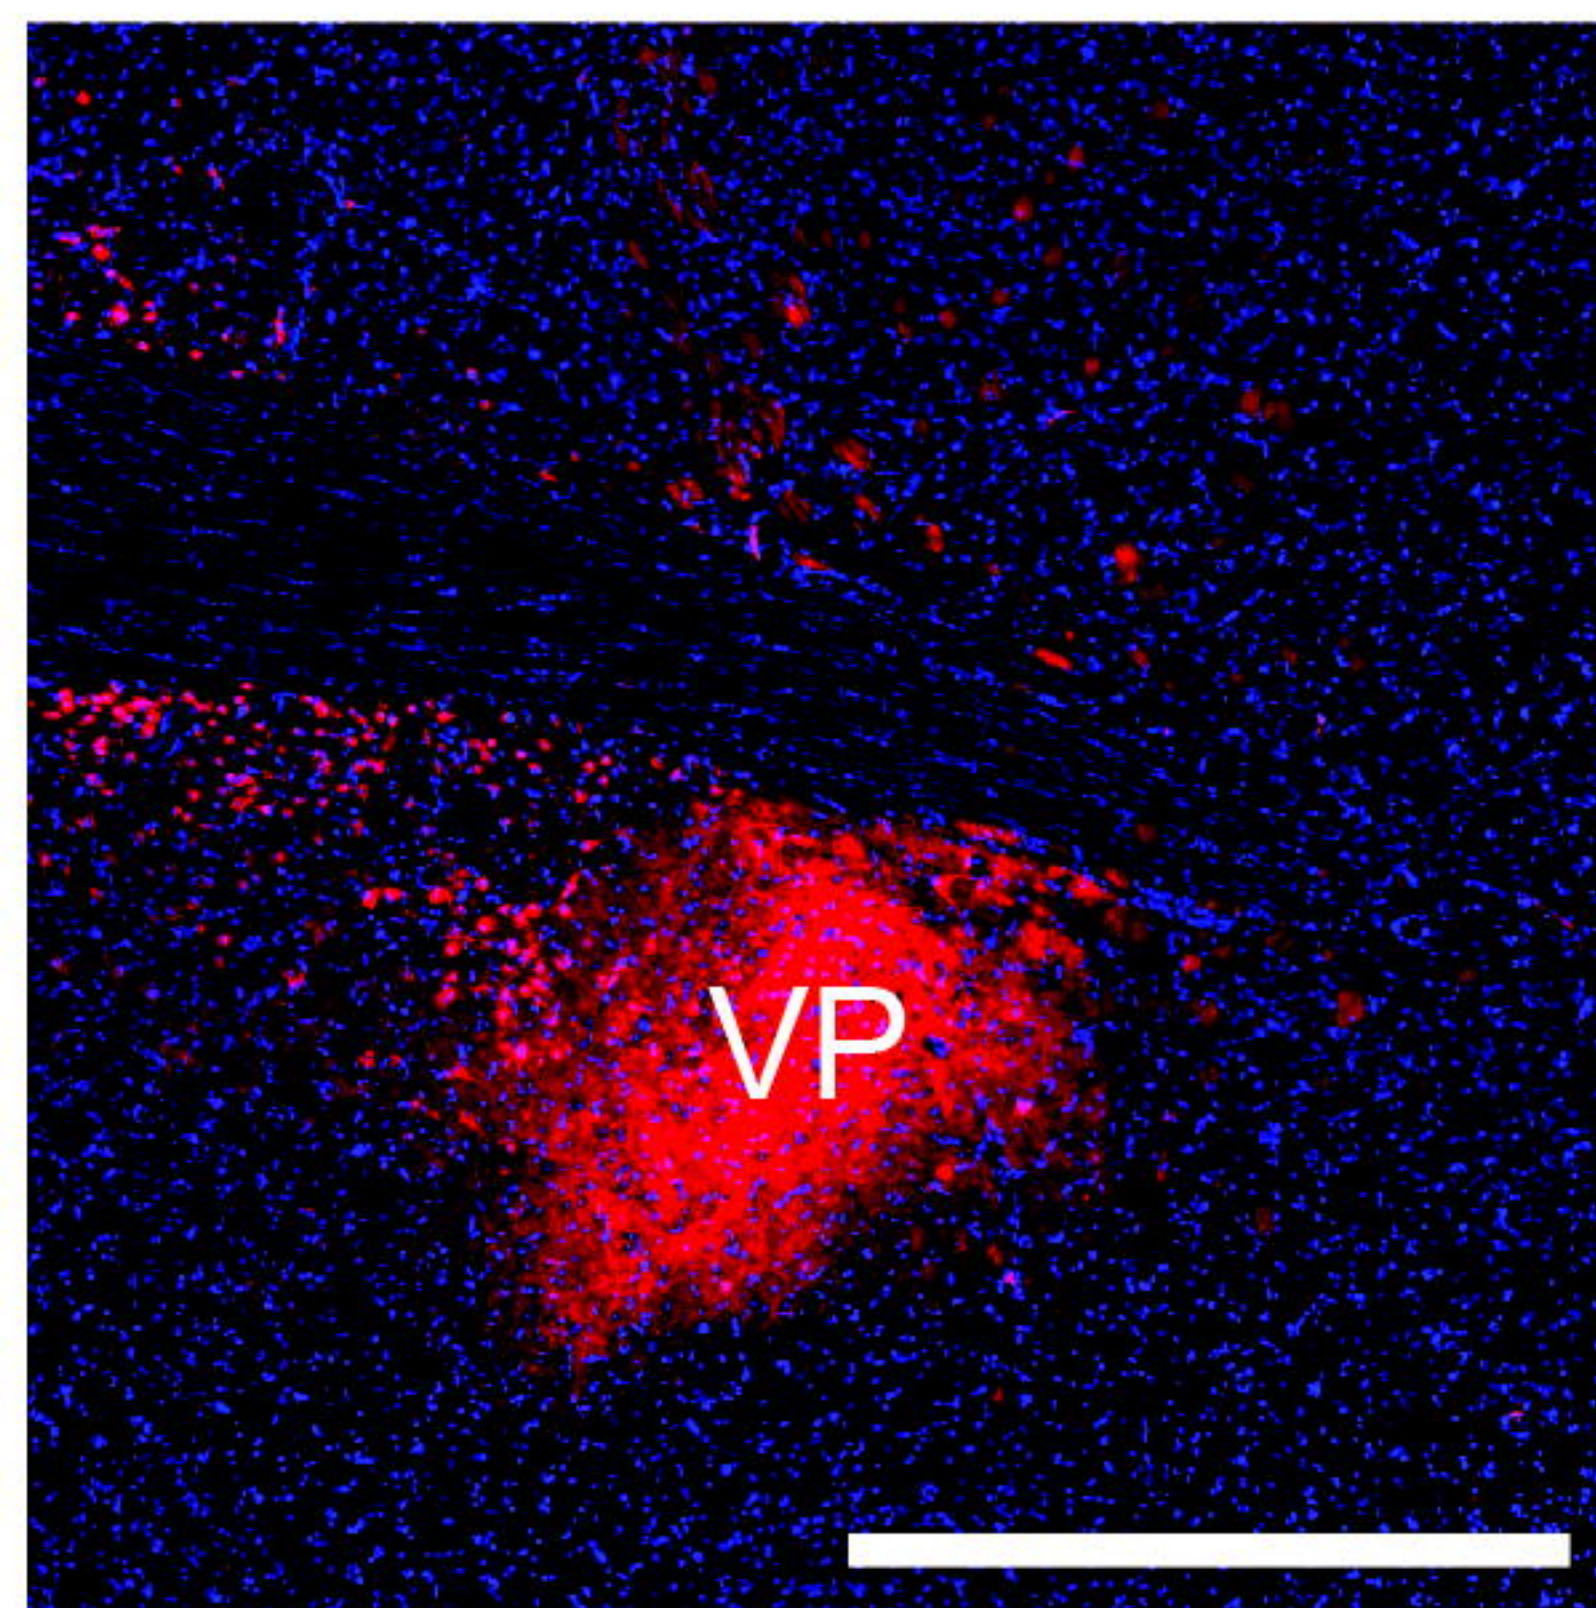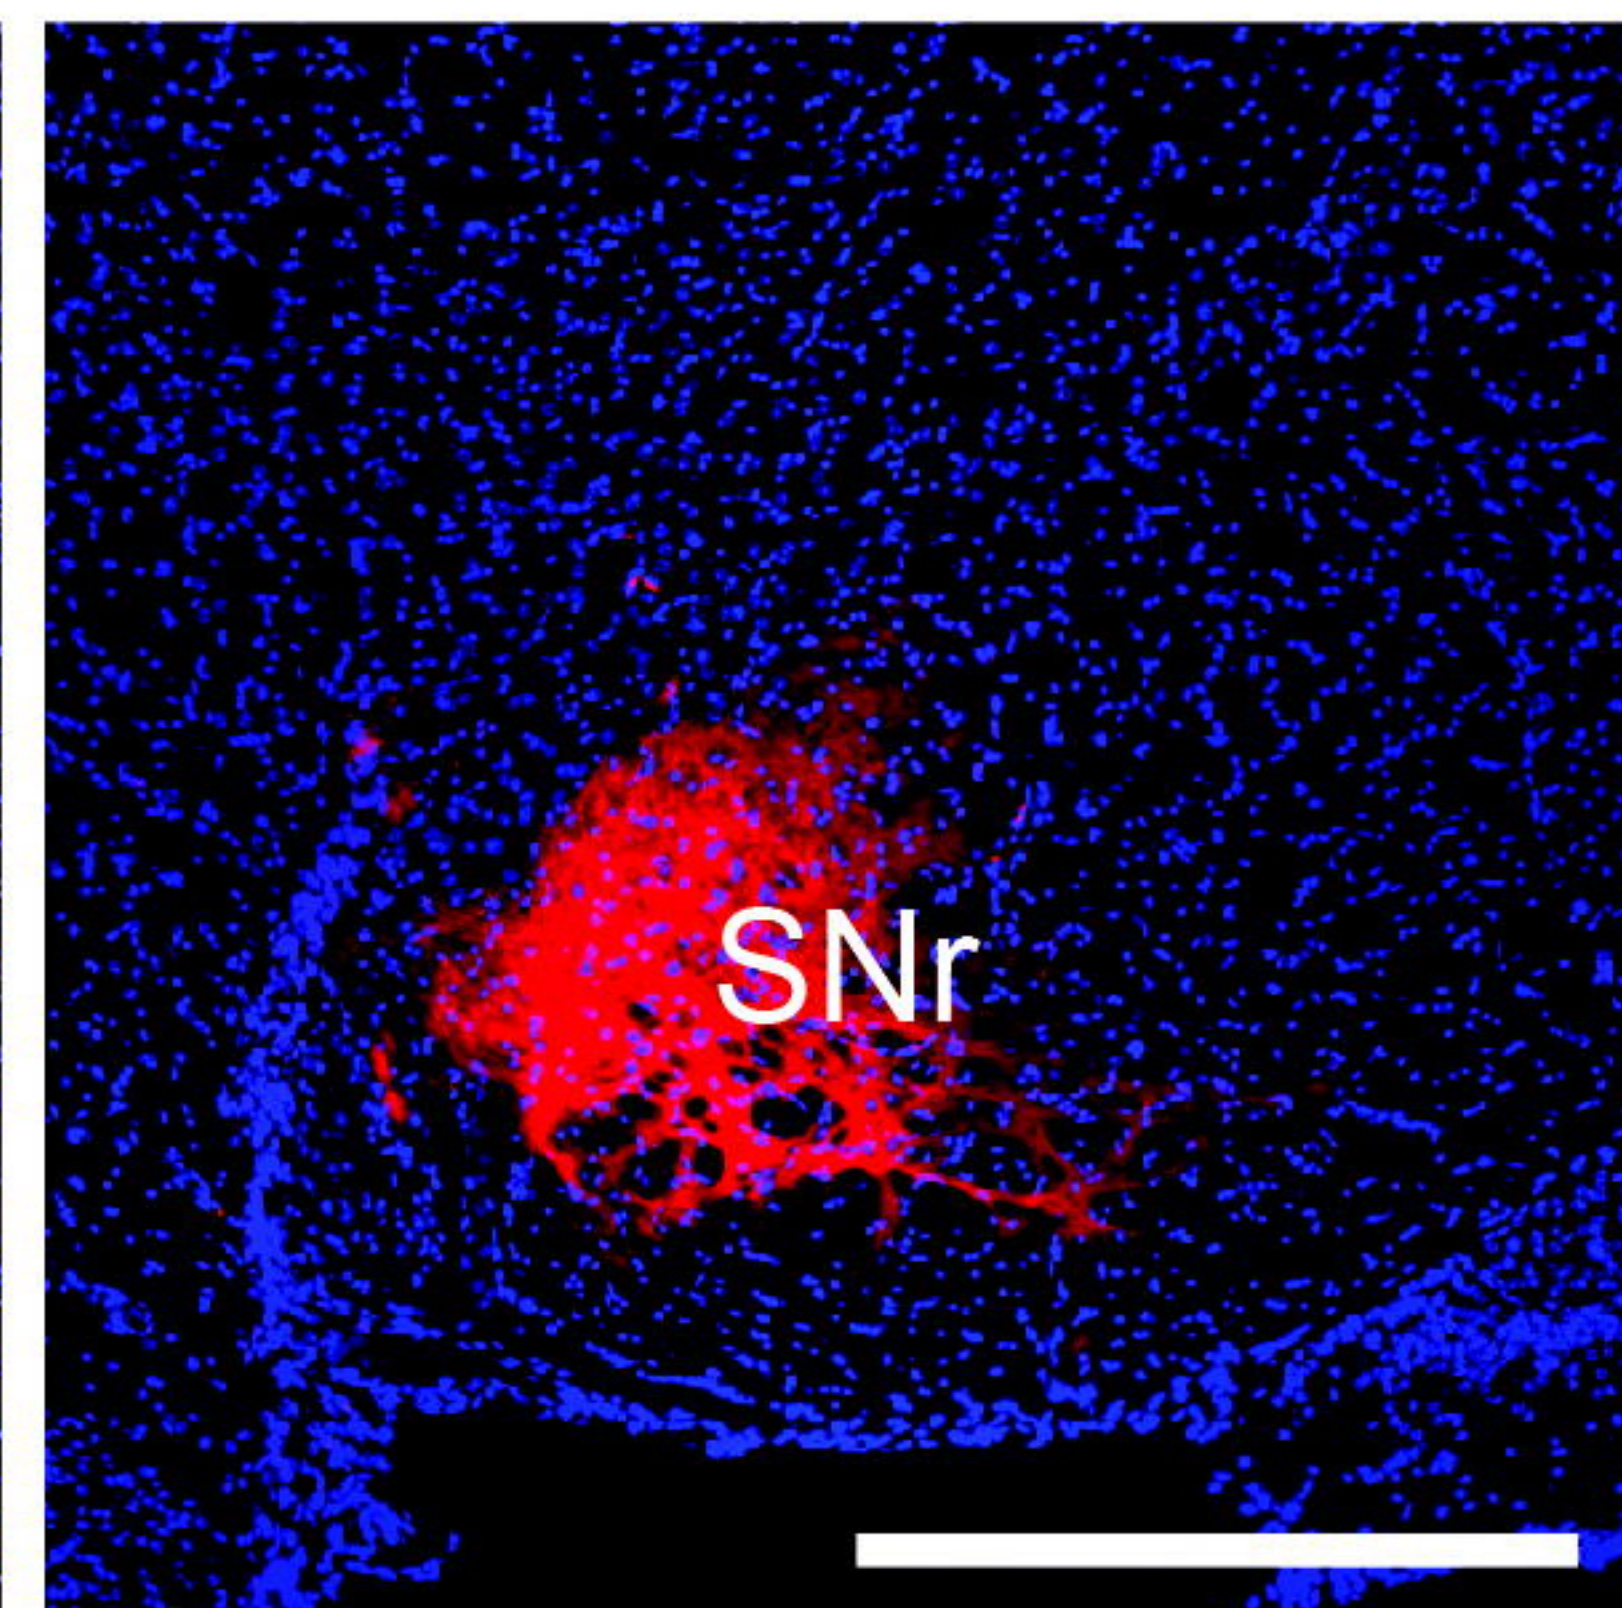

D2-Cre

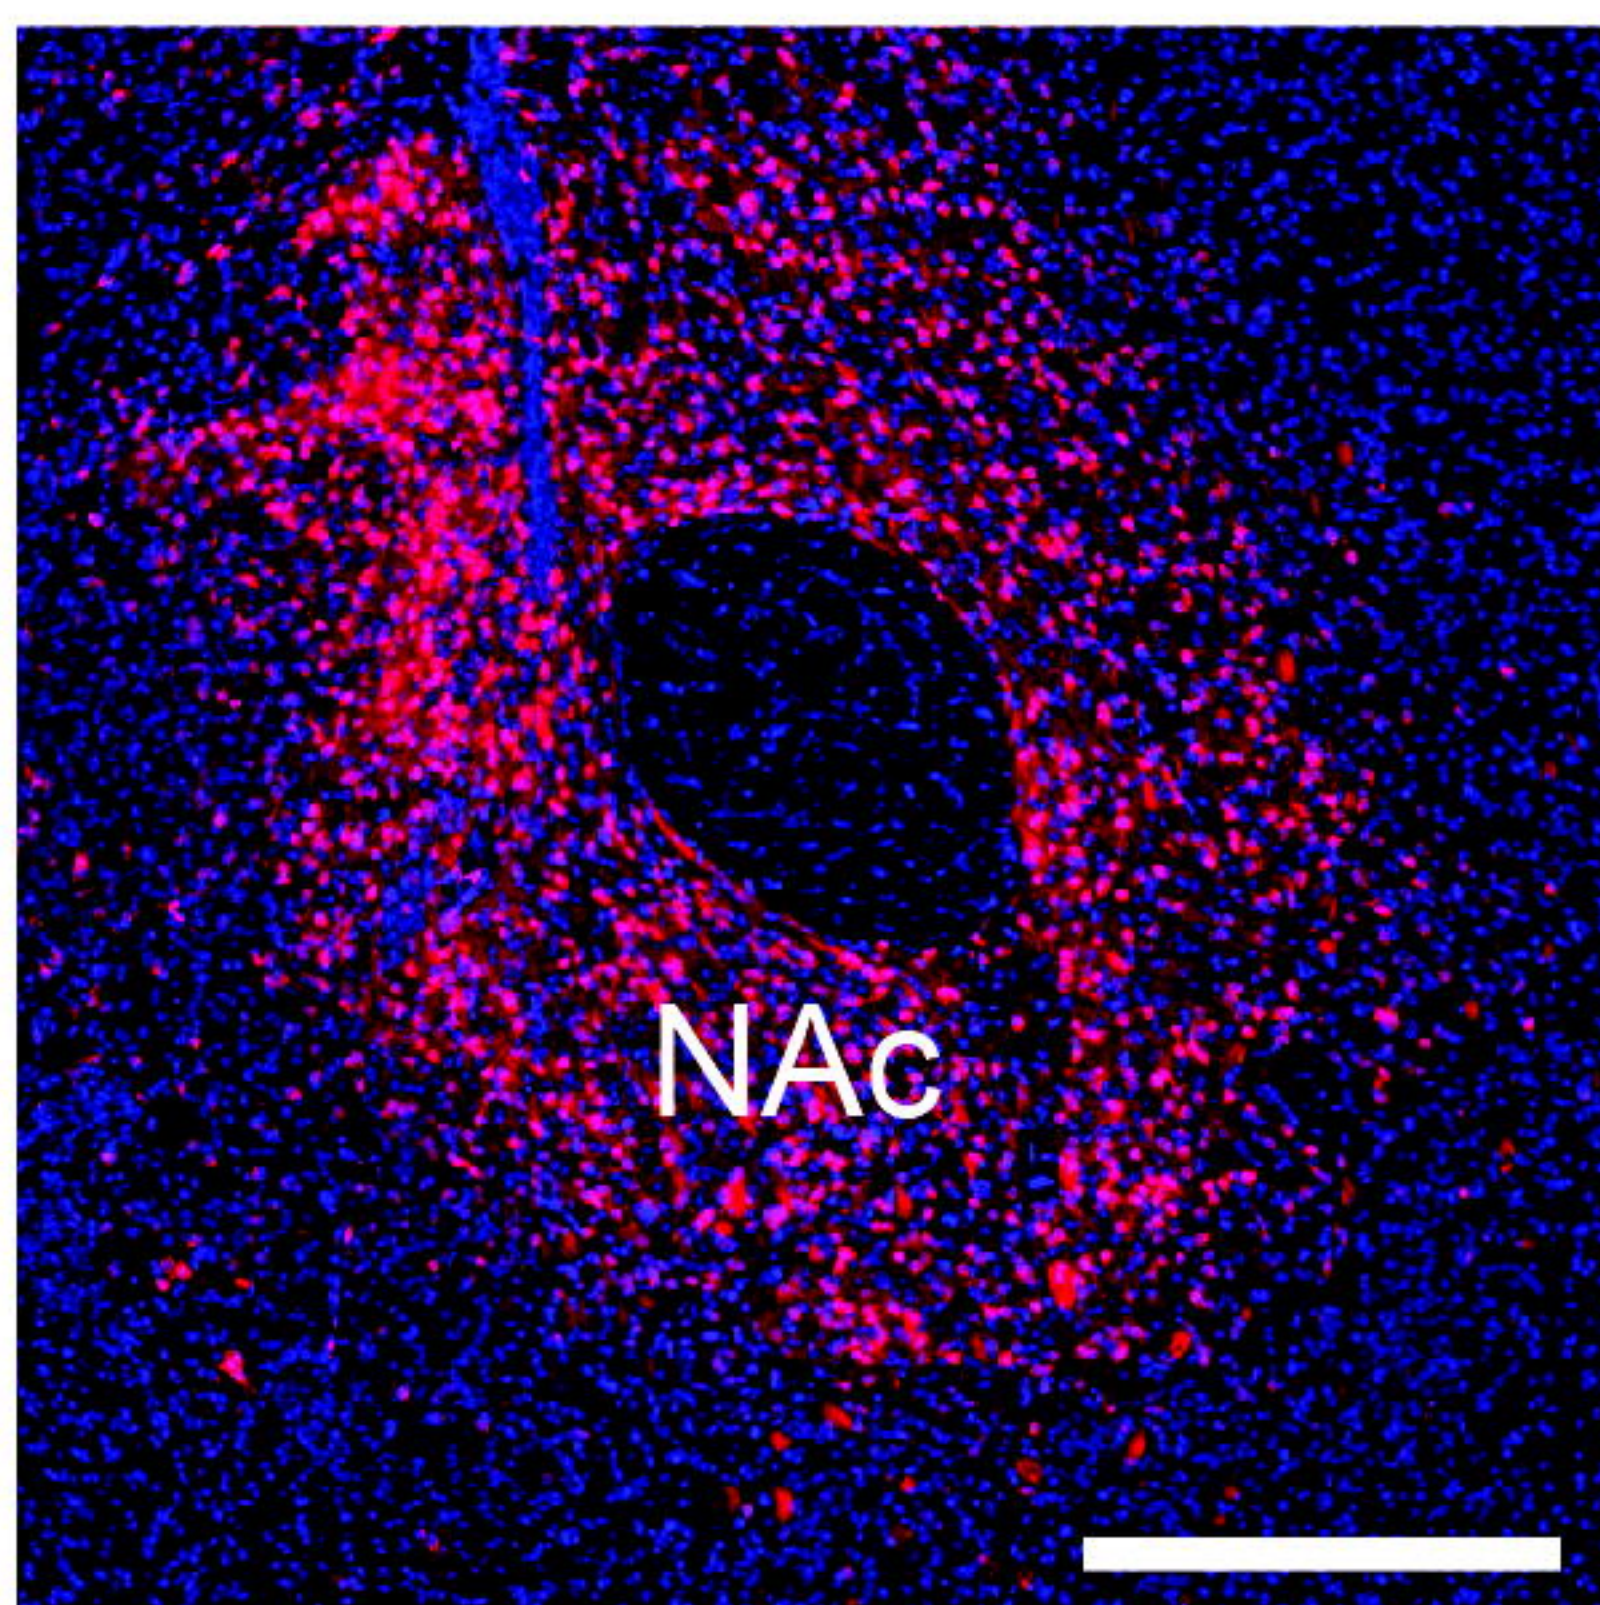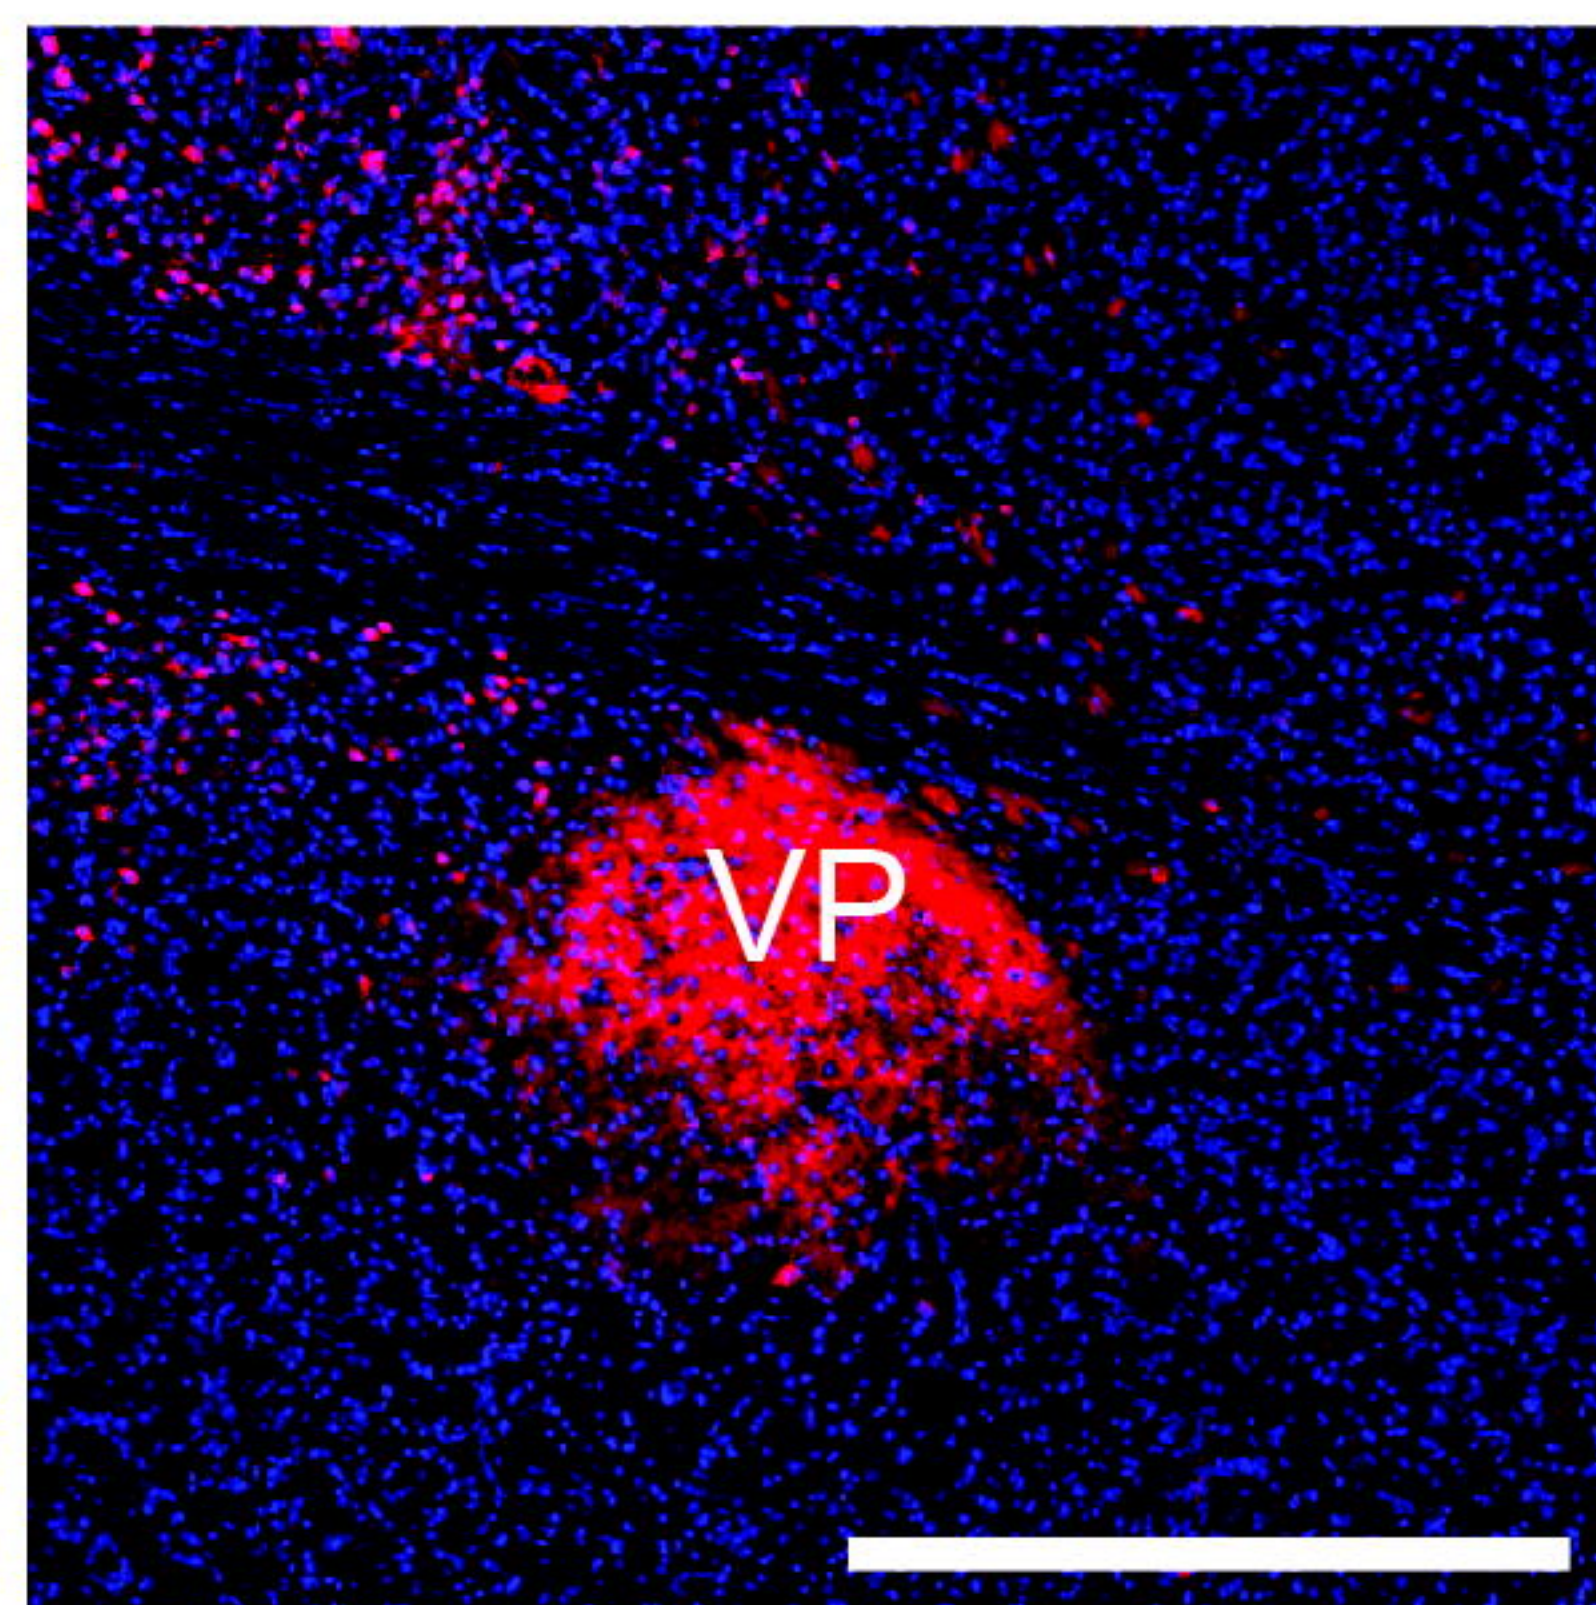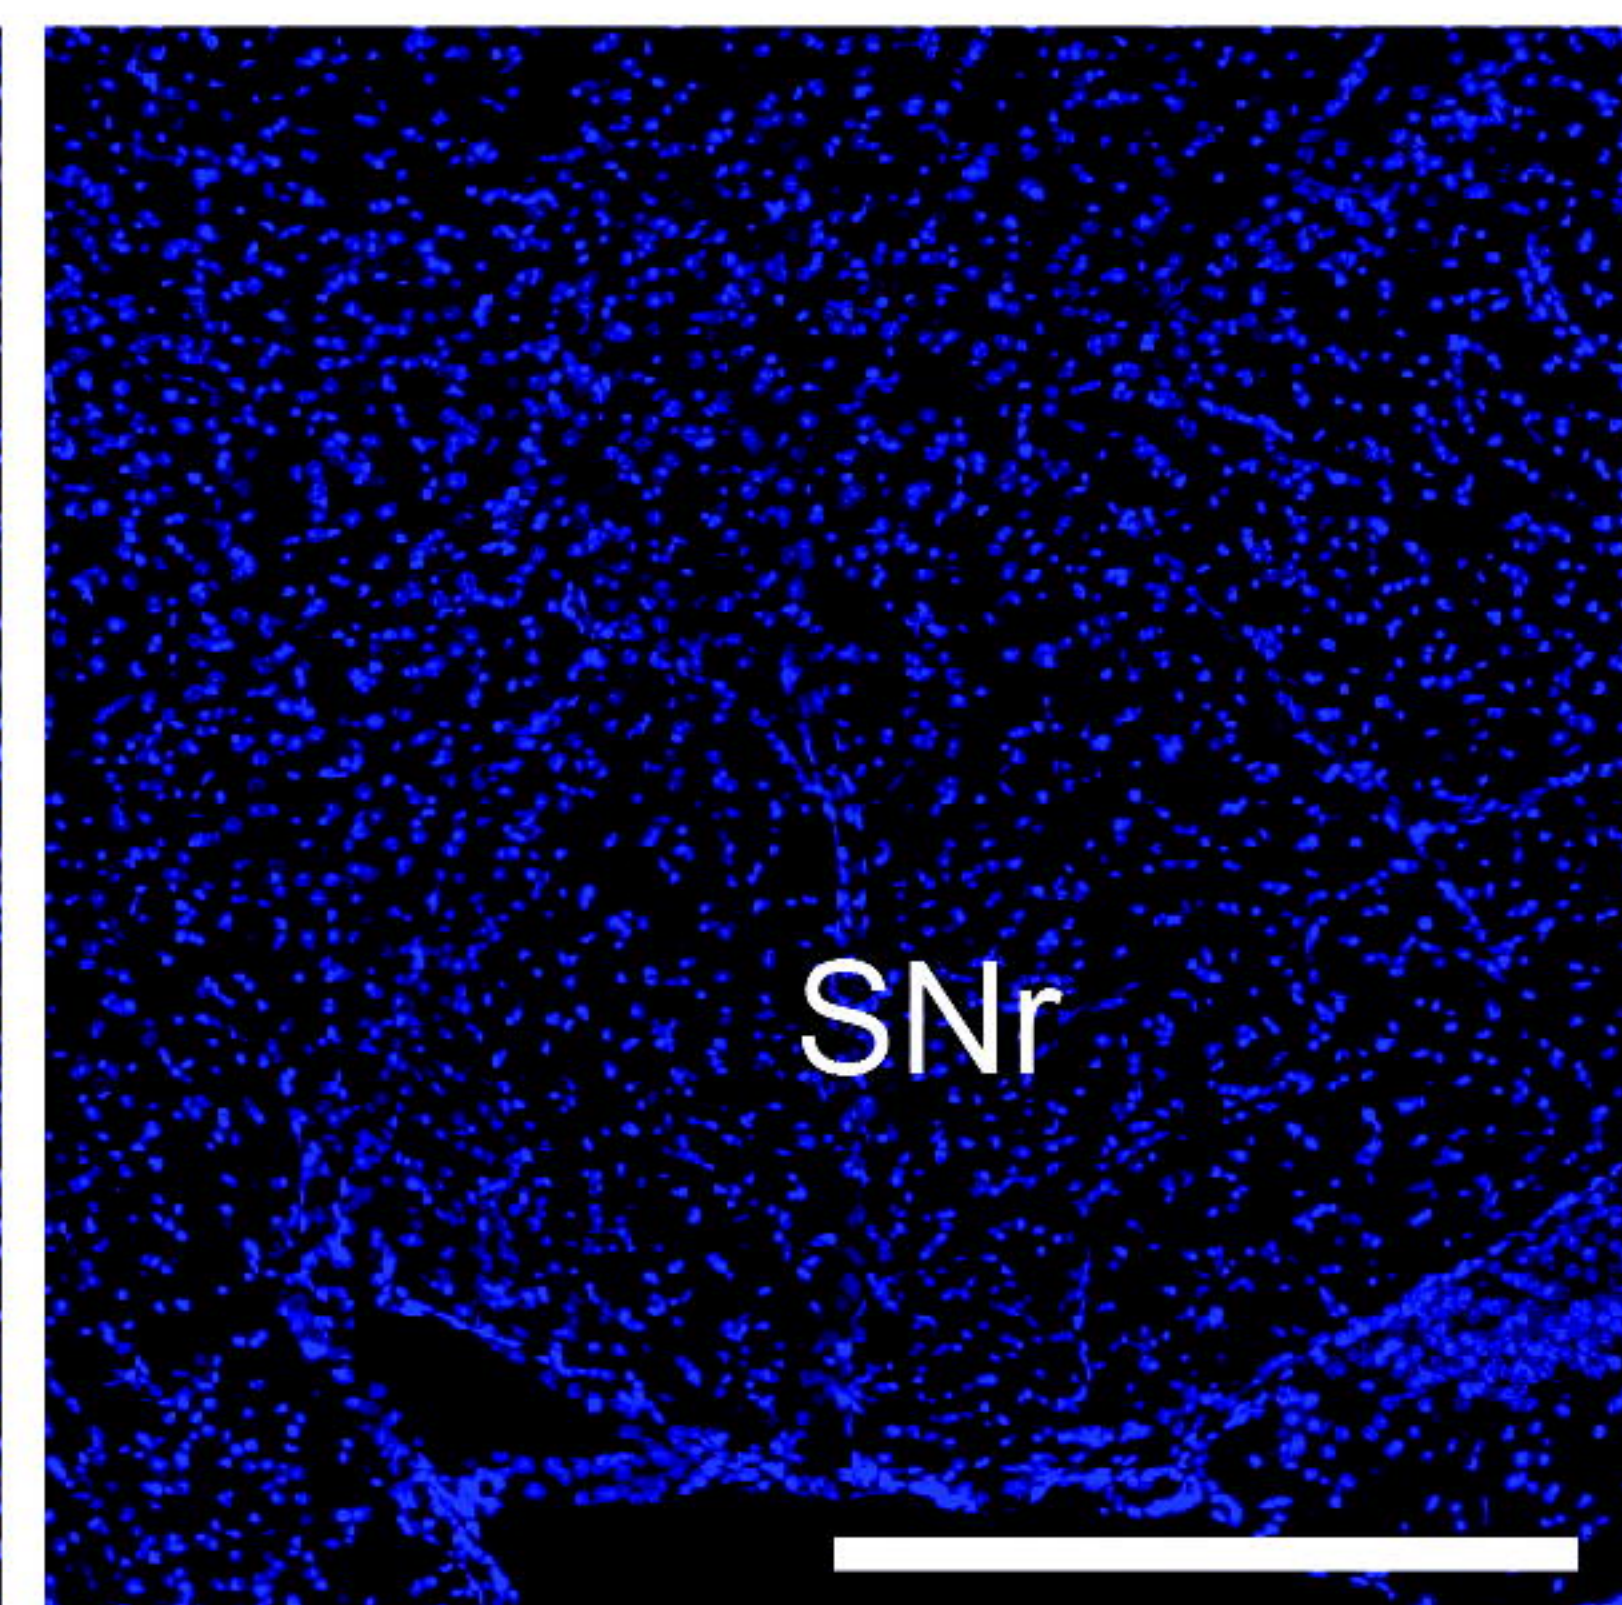

# Supplementary Figure S3 Nishioka et al.

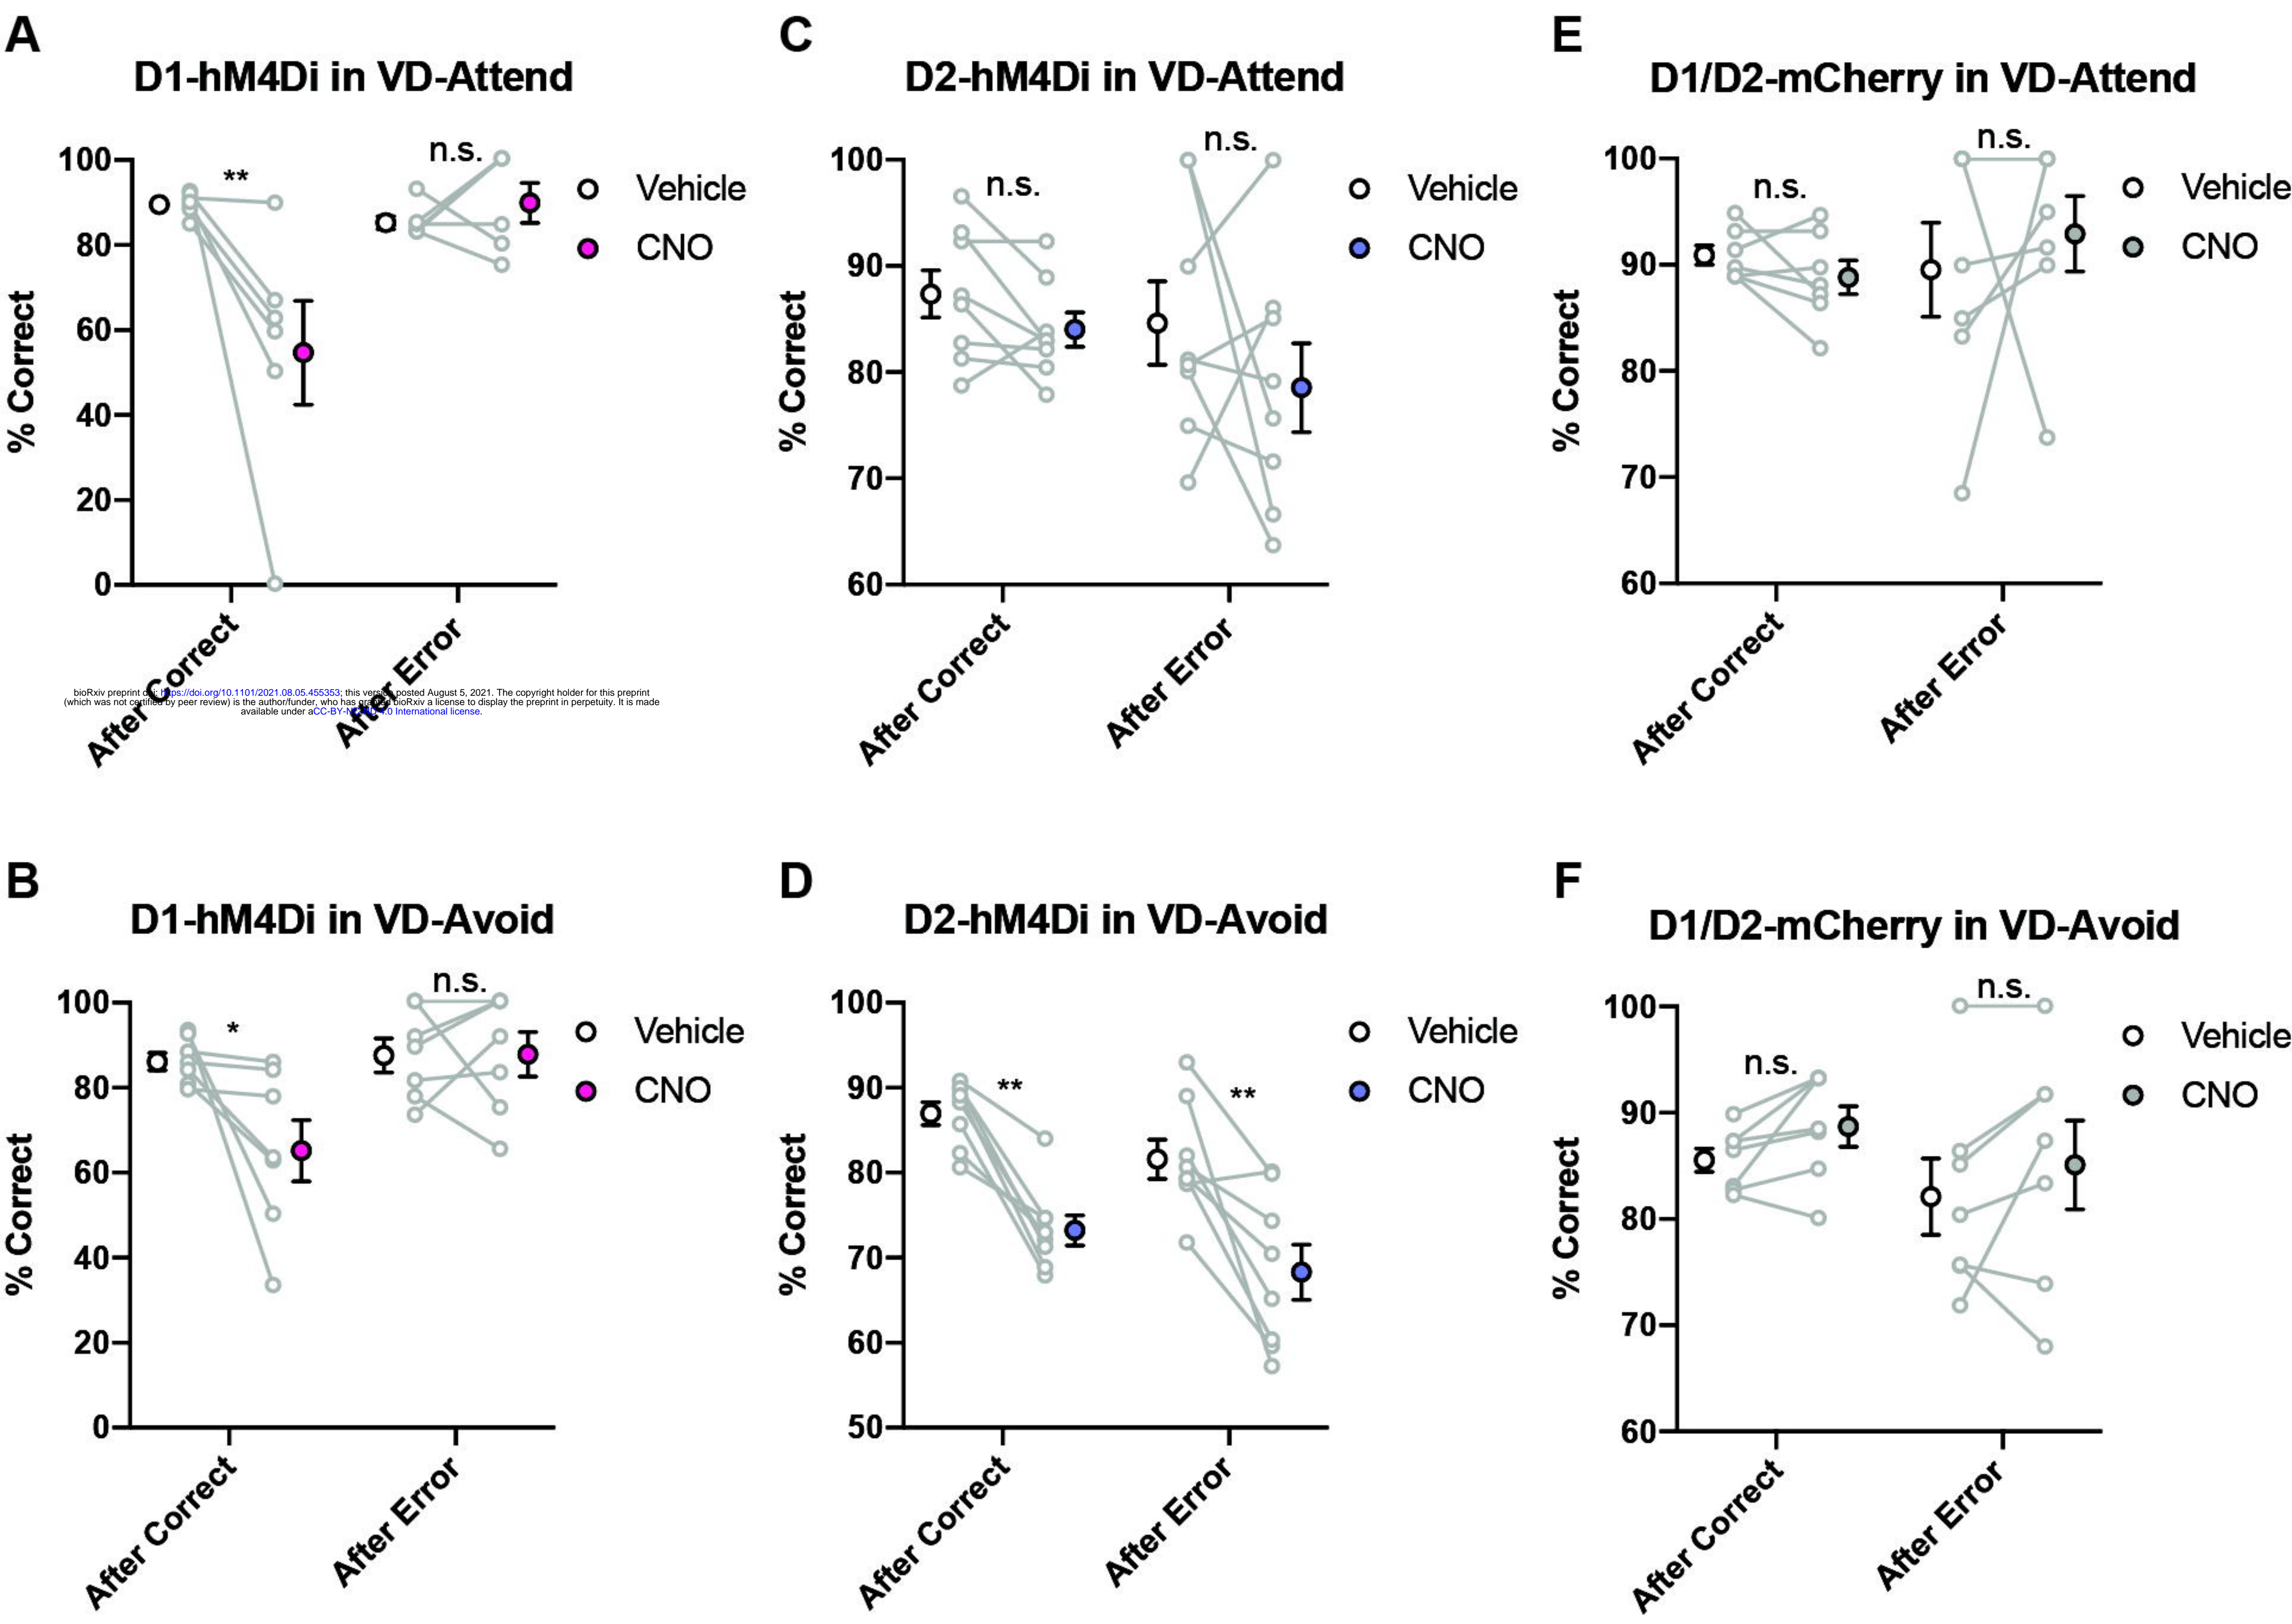

# Supplementary Figure S4 Nishioka et al.

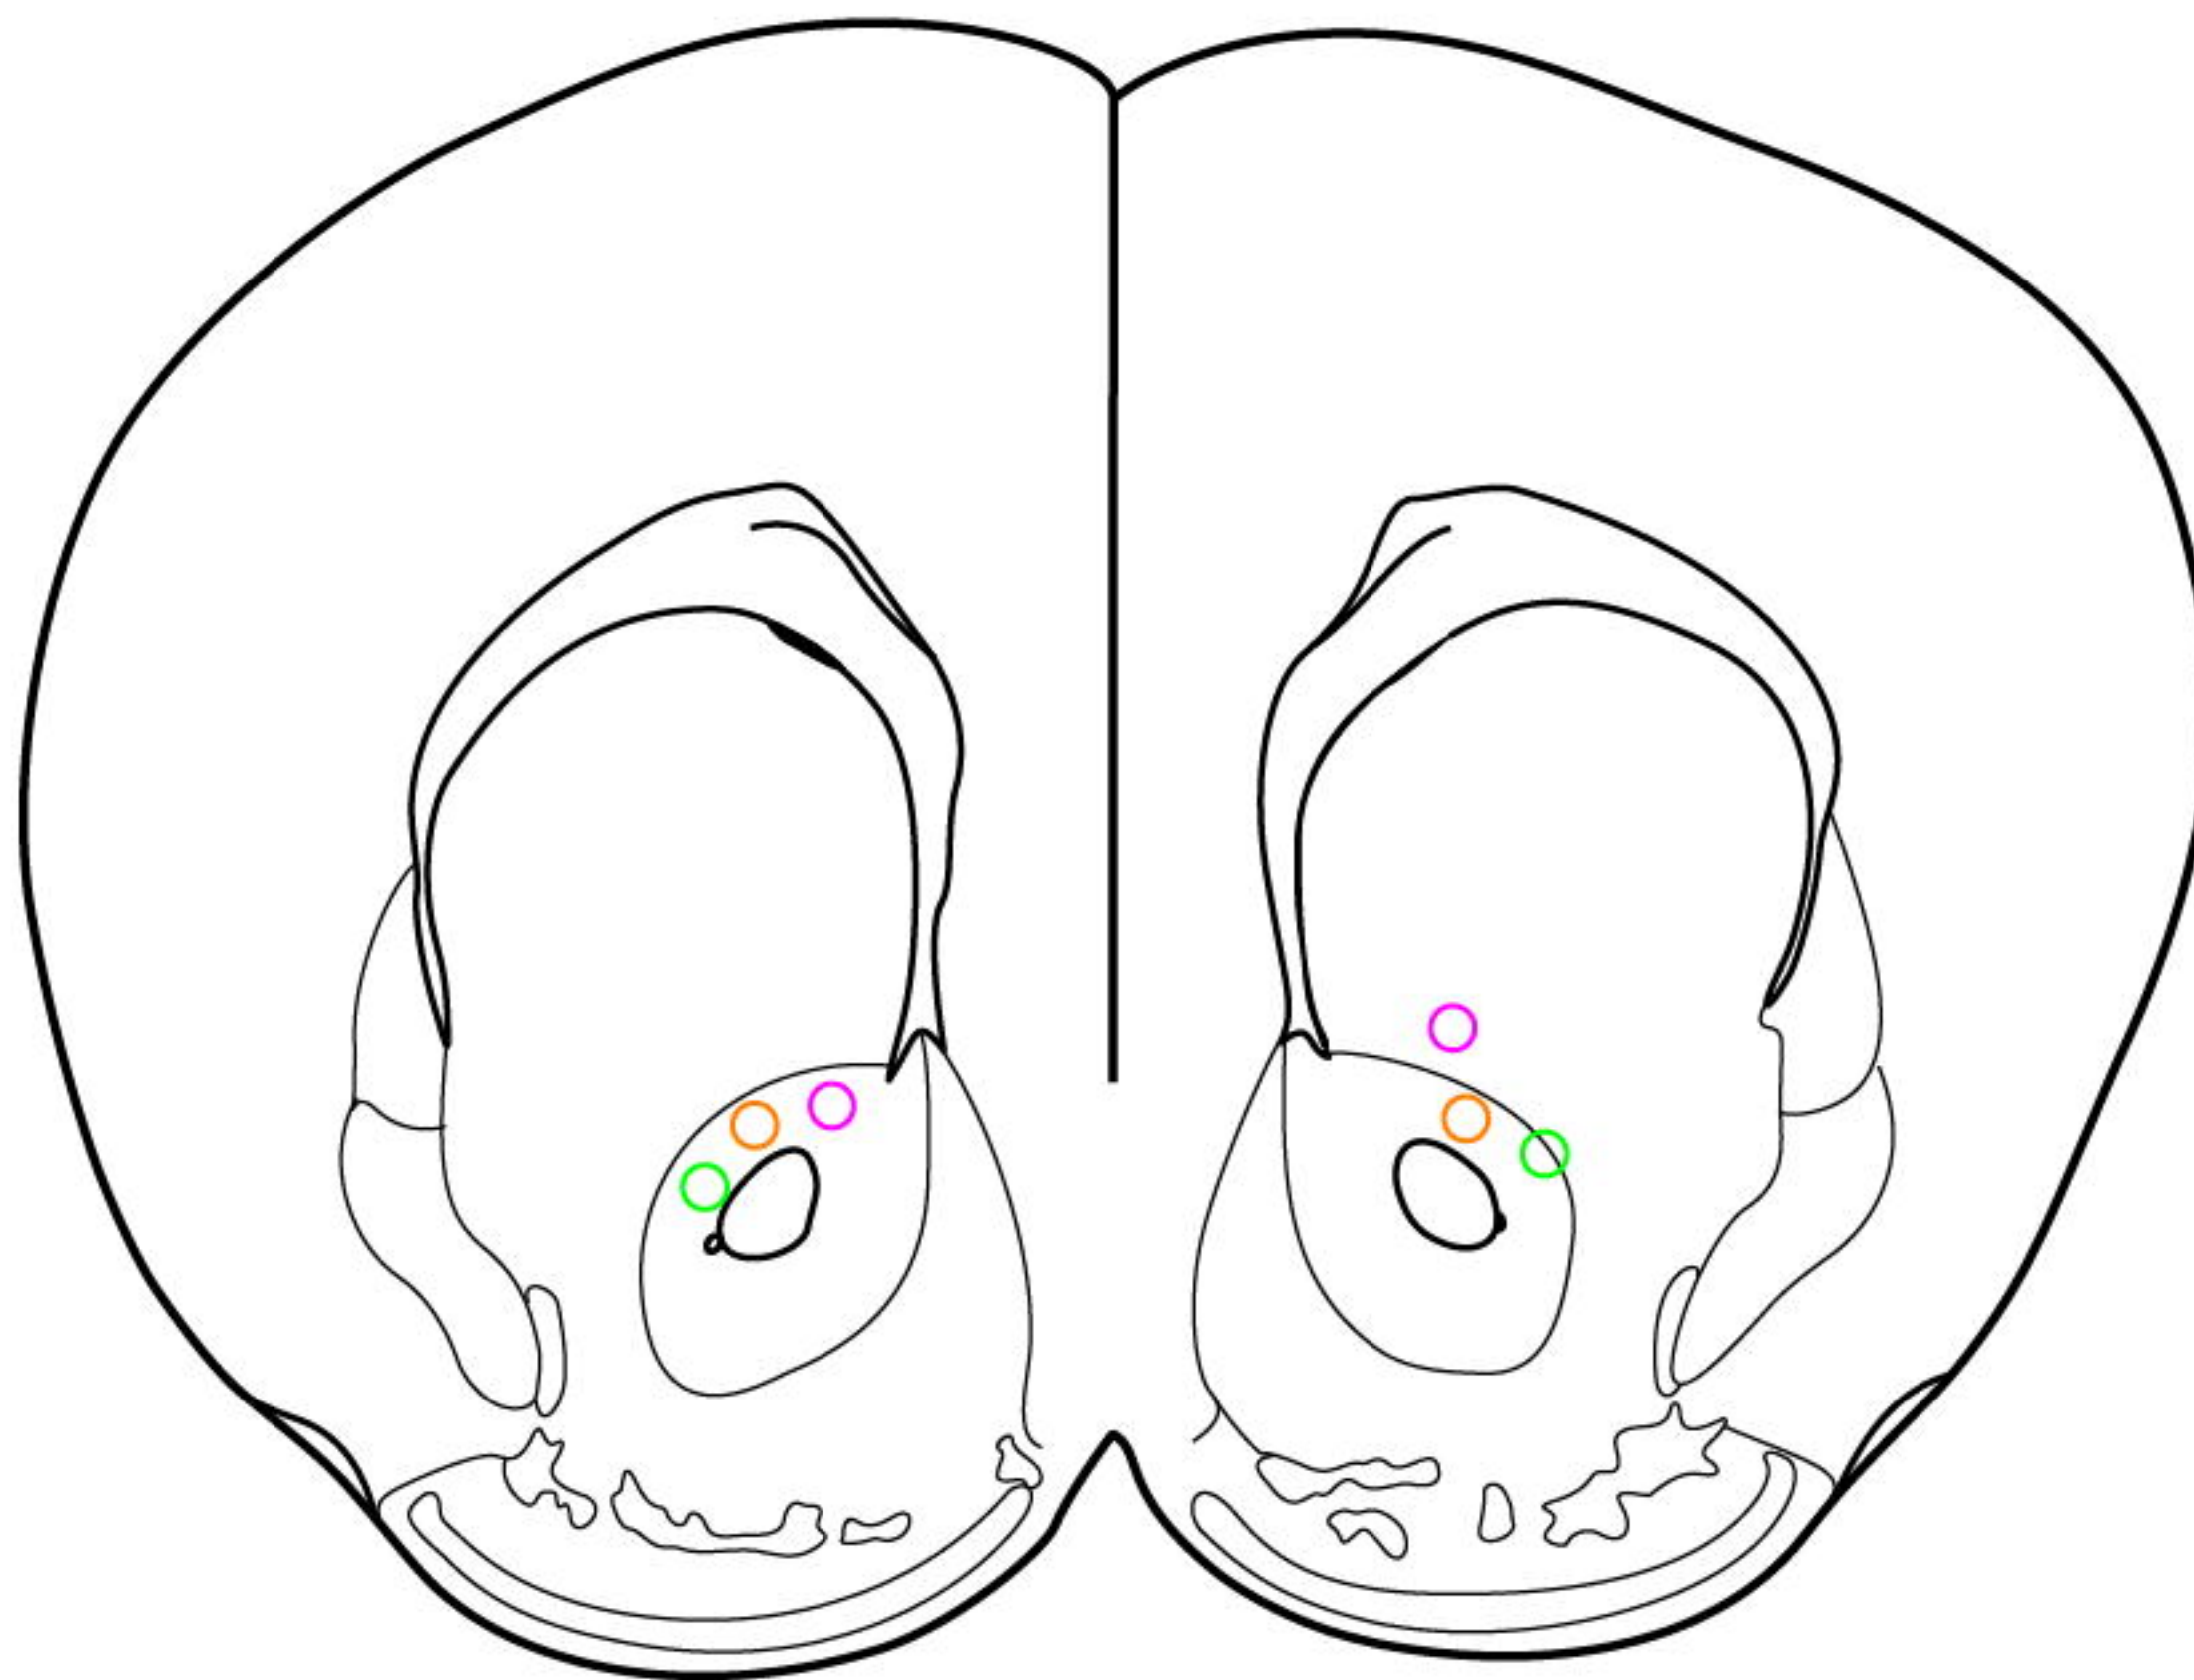

Bregma 1.34 mm

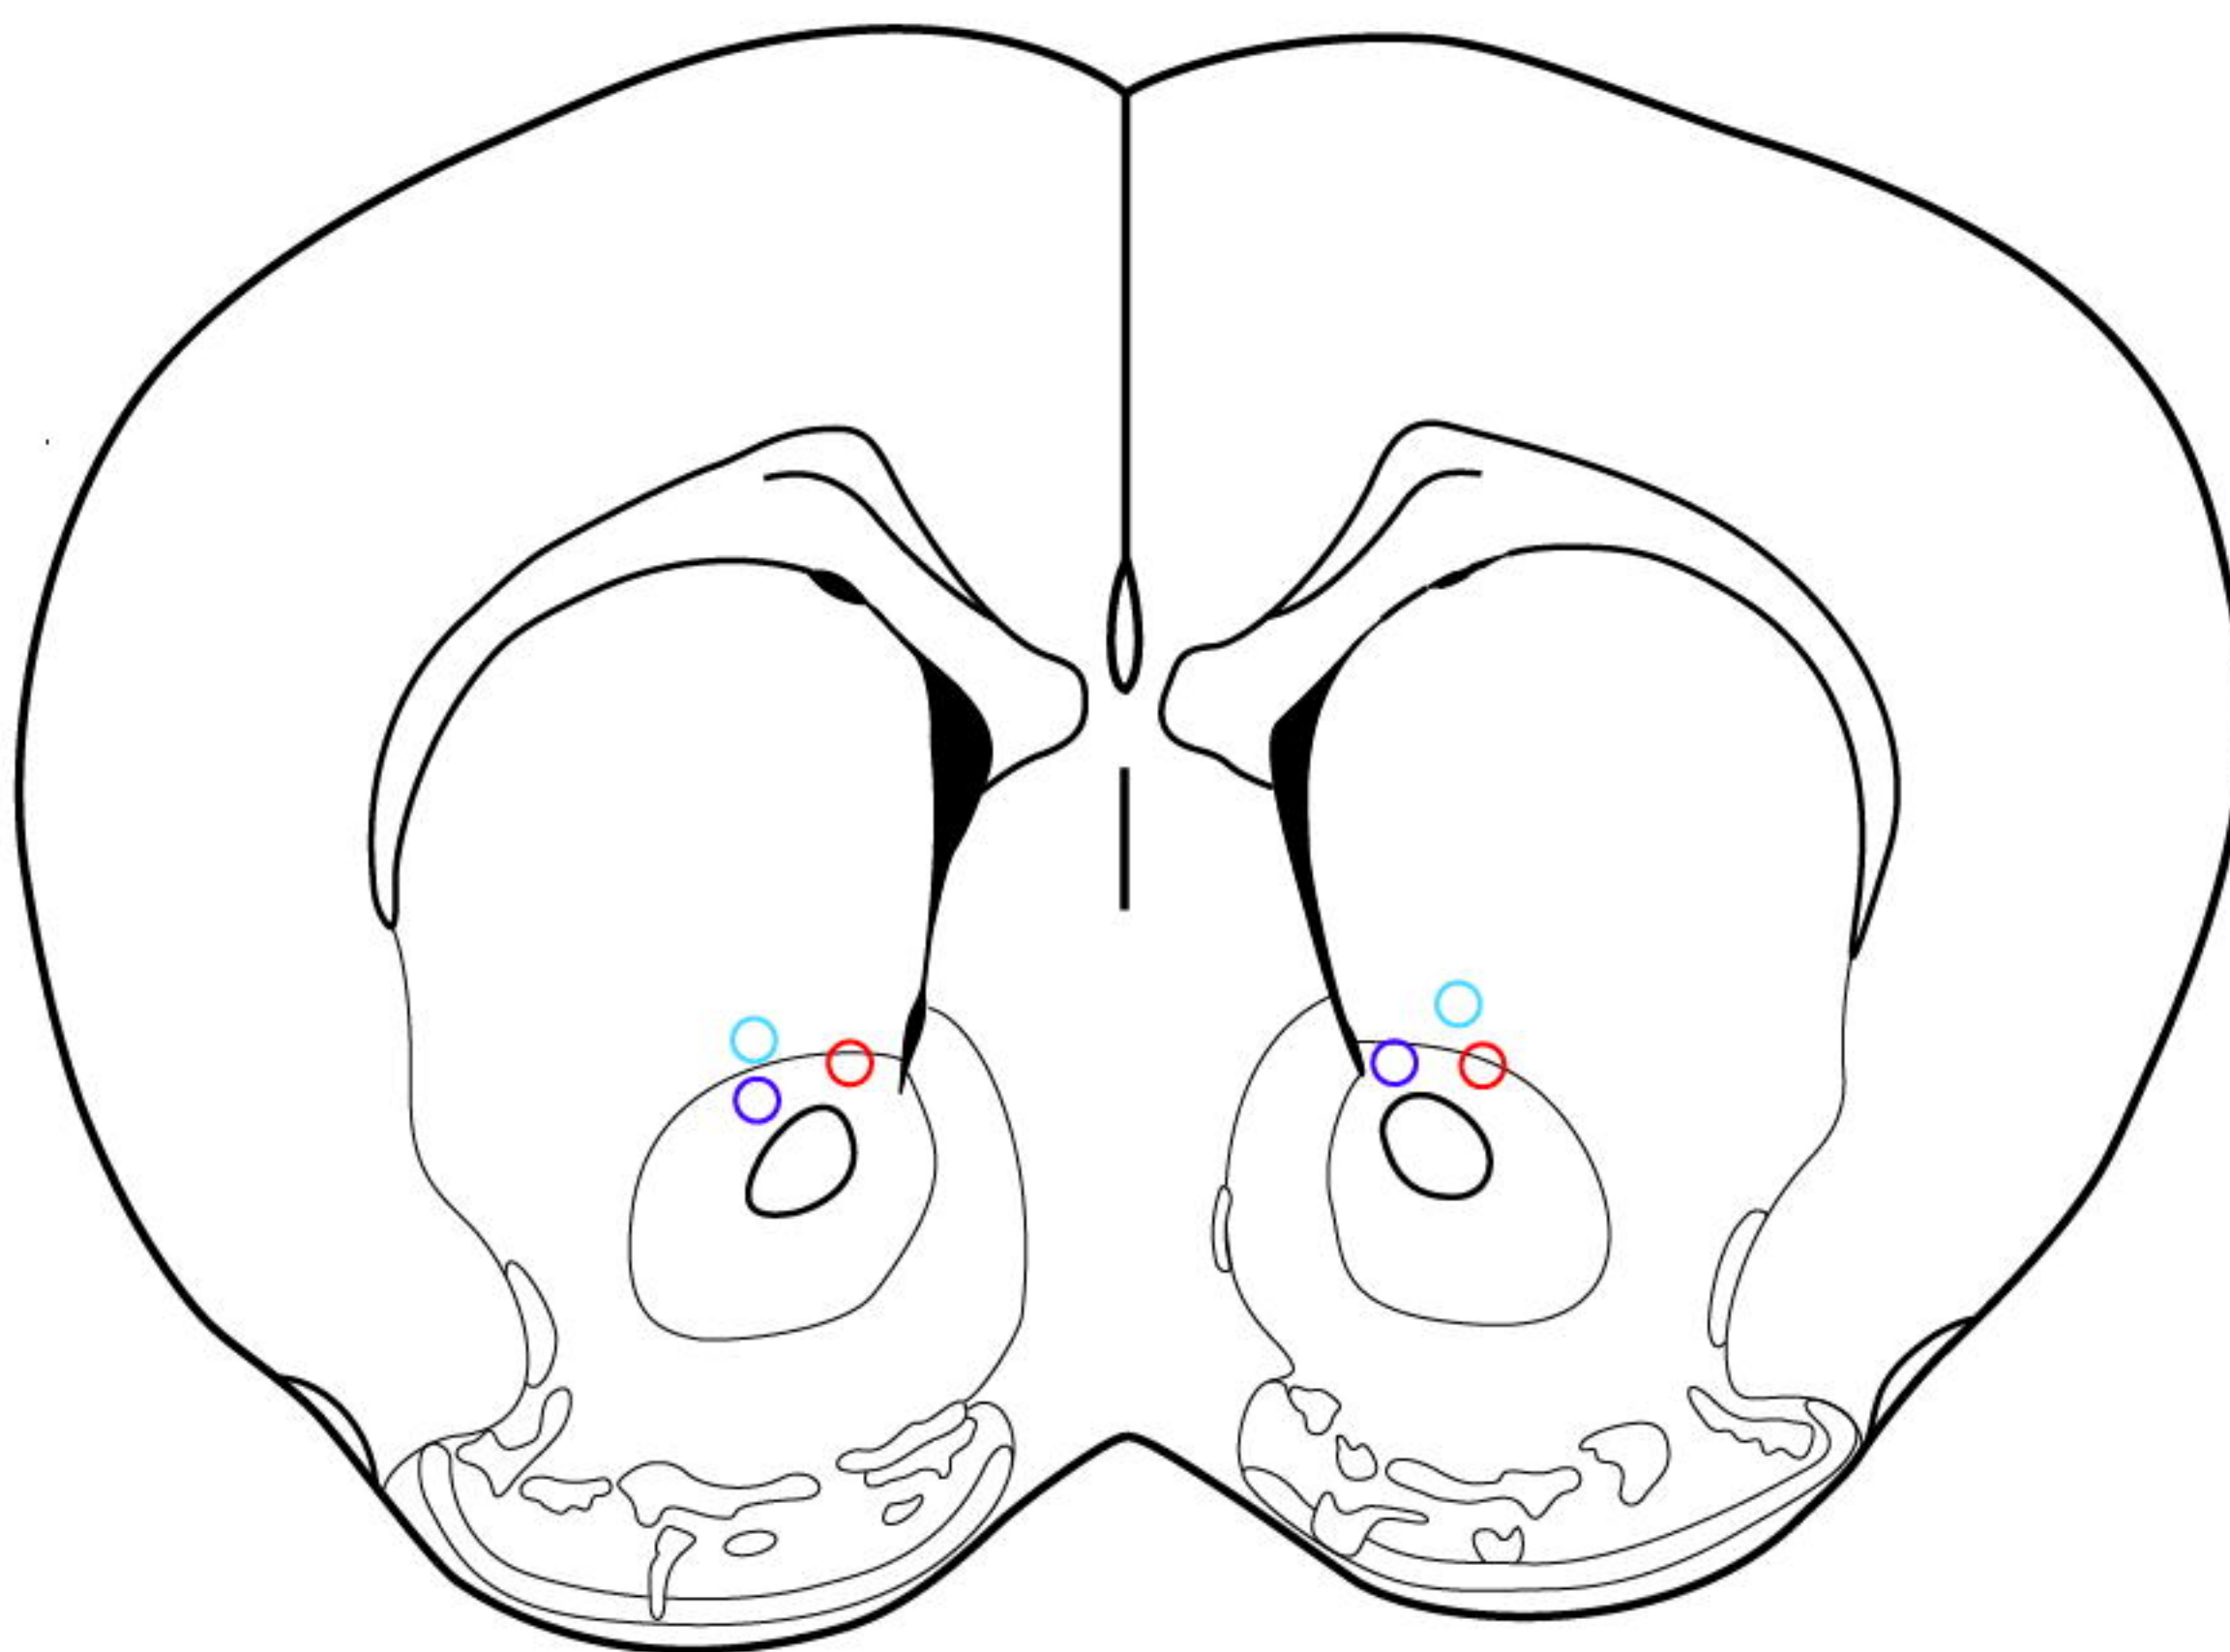

Bregma 1.18 mm

bioRxiv preprint doi: <https://doi.org/10.1101/2021.08.05.455353>; this version posted August 5, 2021. The copyright holder for this preprint (which was not certified by peer review) is the author/funder, who has granted bioRxiv a license to display the preprint in perpetuity. It is made available under aCC-BY-NC-ND 4.0 International license.

- opt #1
- opt #2
- opt #3
- opt #4
- opt #5
- opt #6
- opt #7
- opt #8
- opt #9

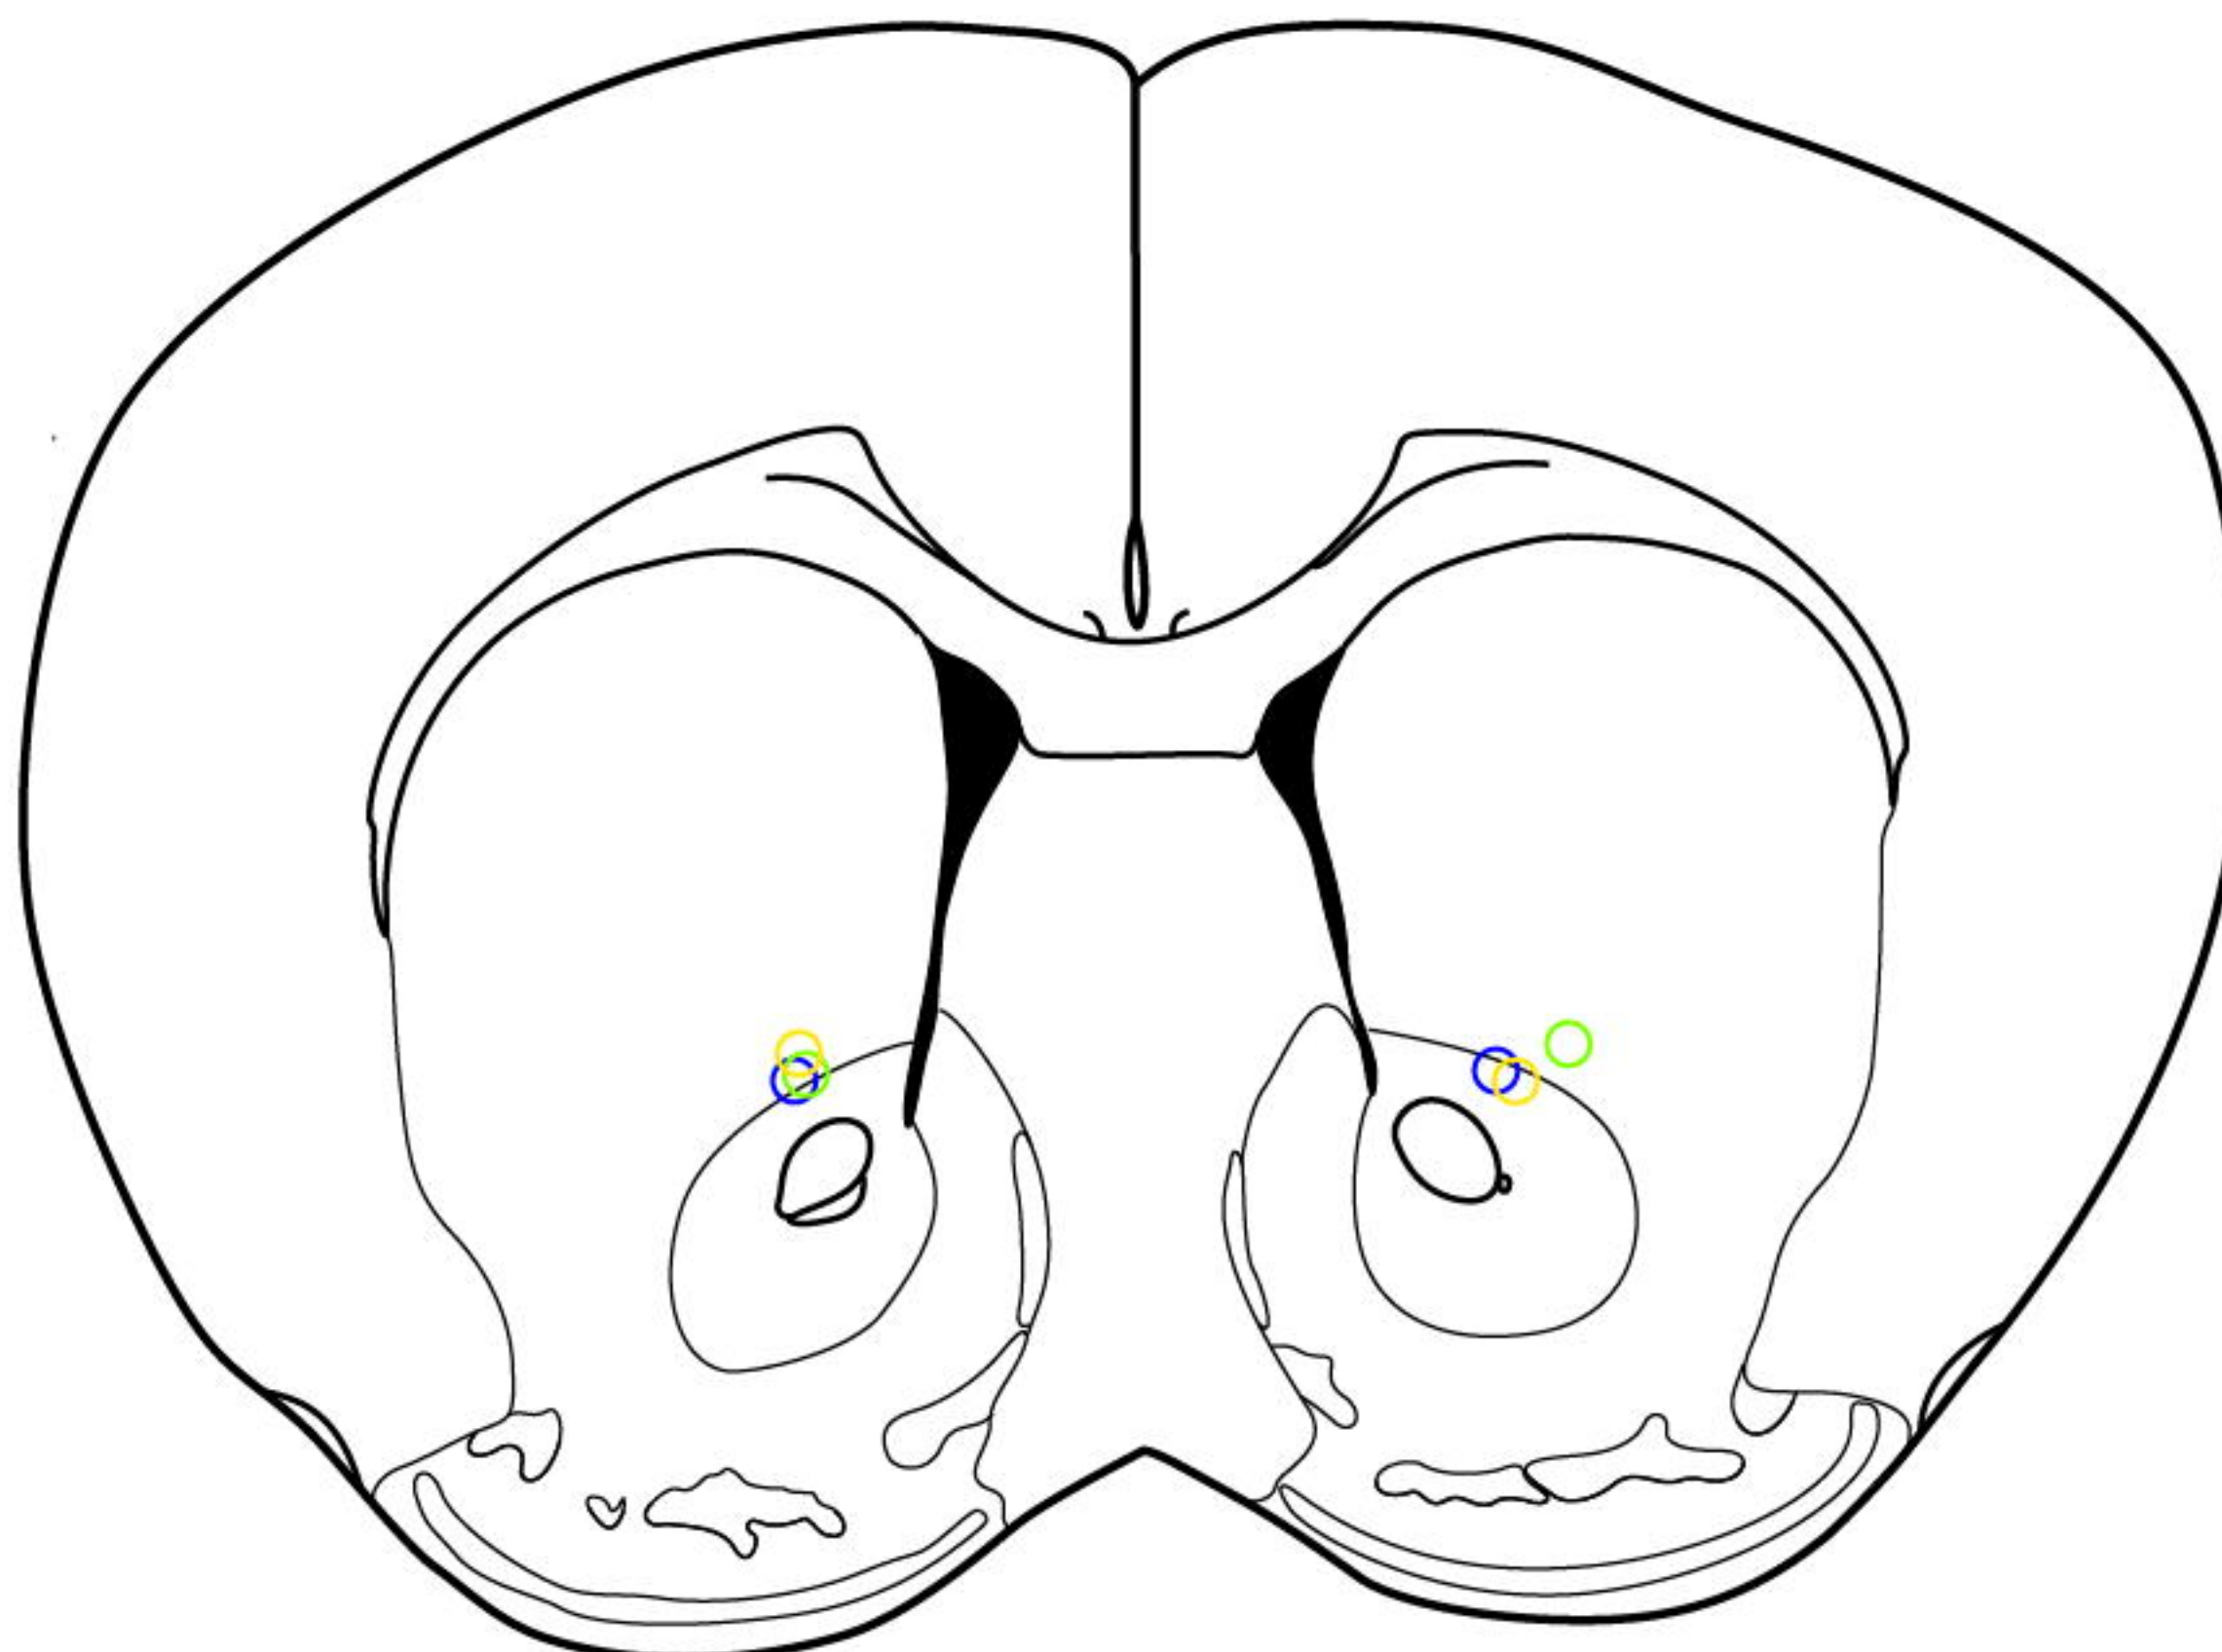

Bregma 1.10 mm

# Supplementary Figure S5 Nishioka et al.

## A ITI Inhibition (ArchT)

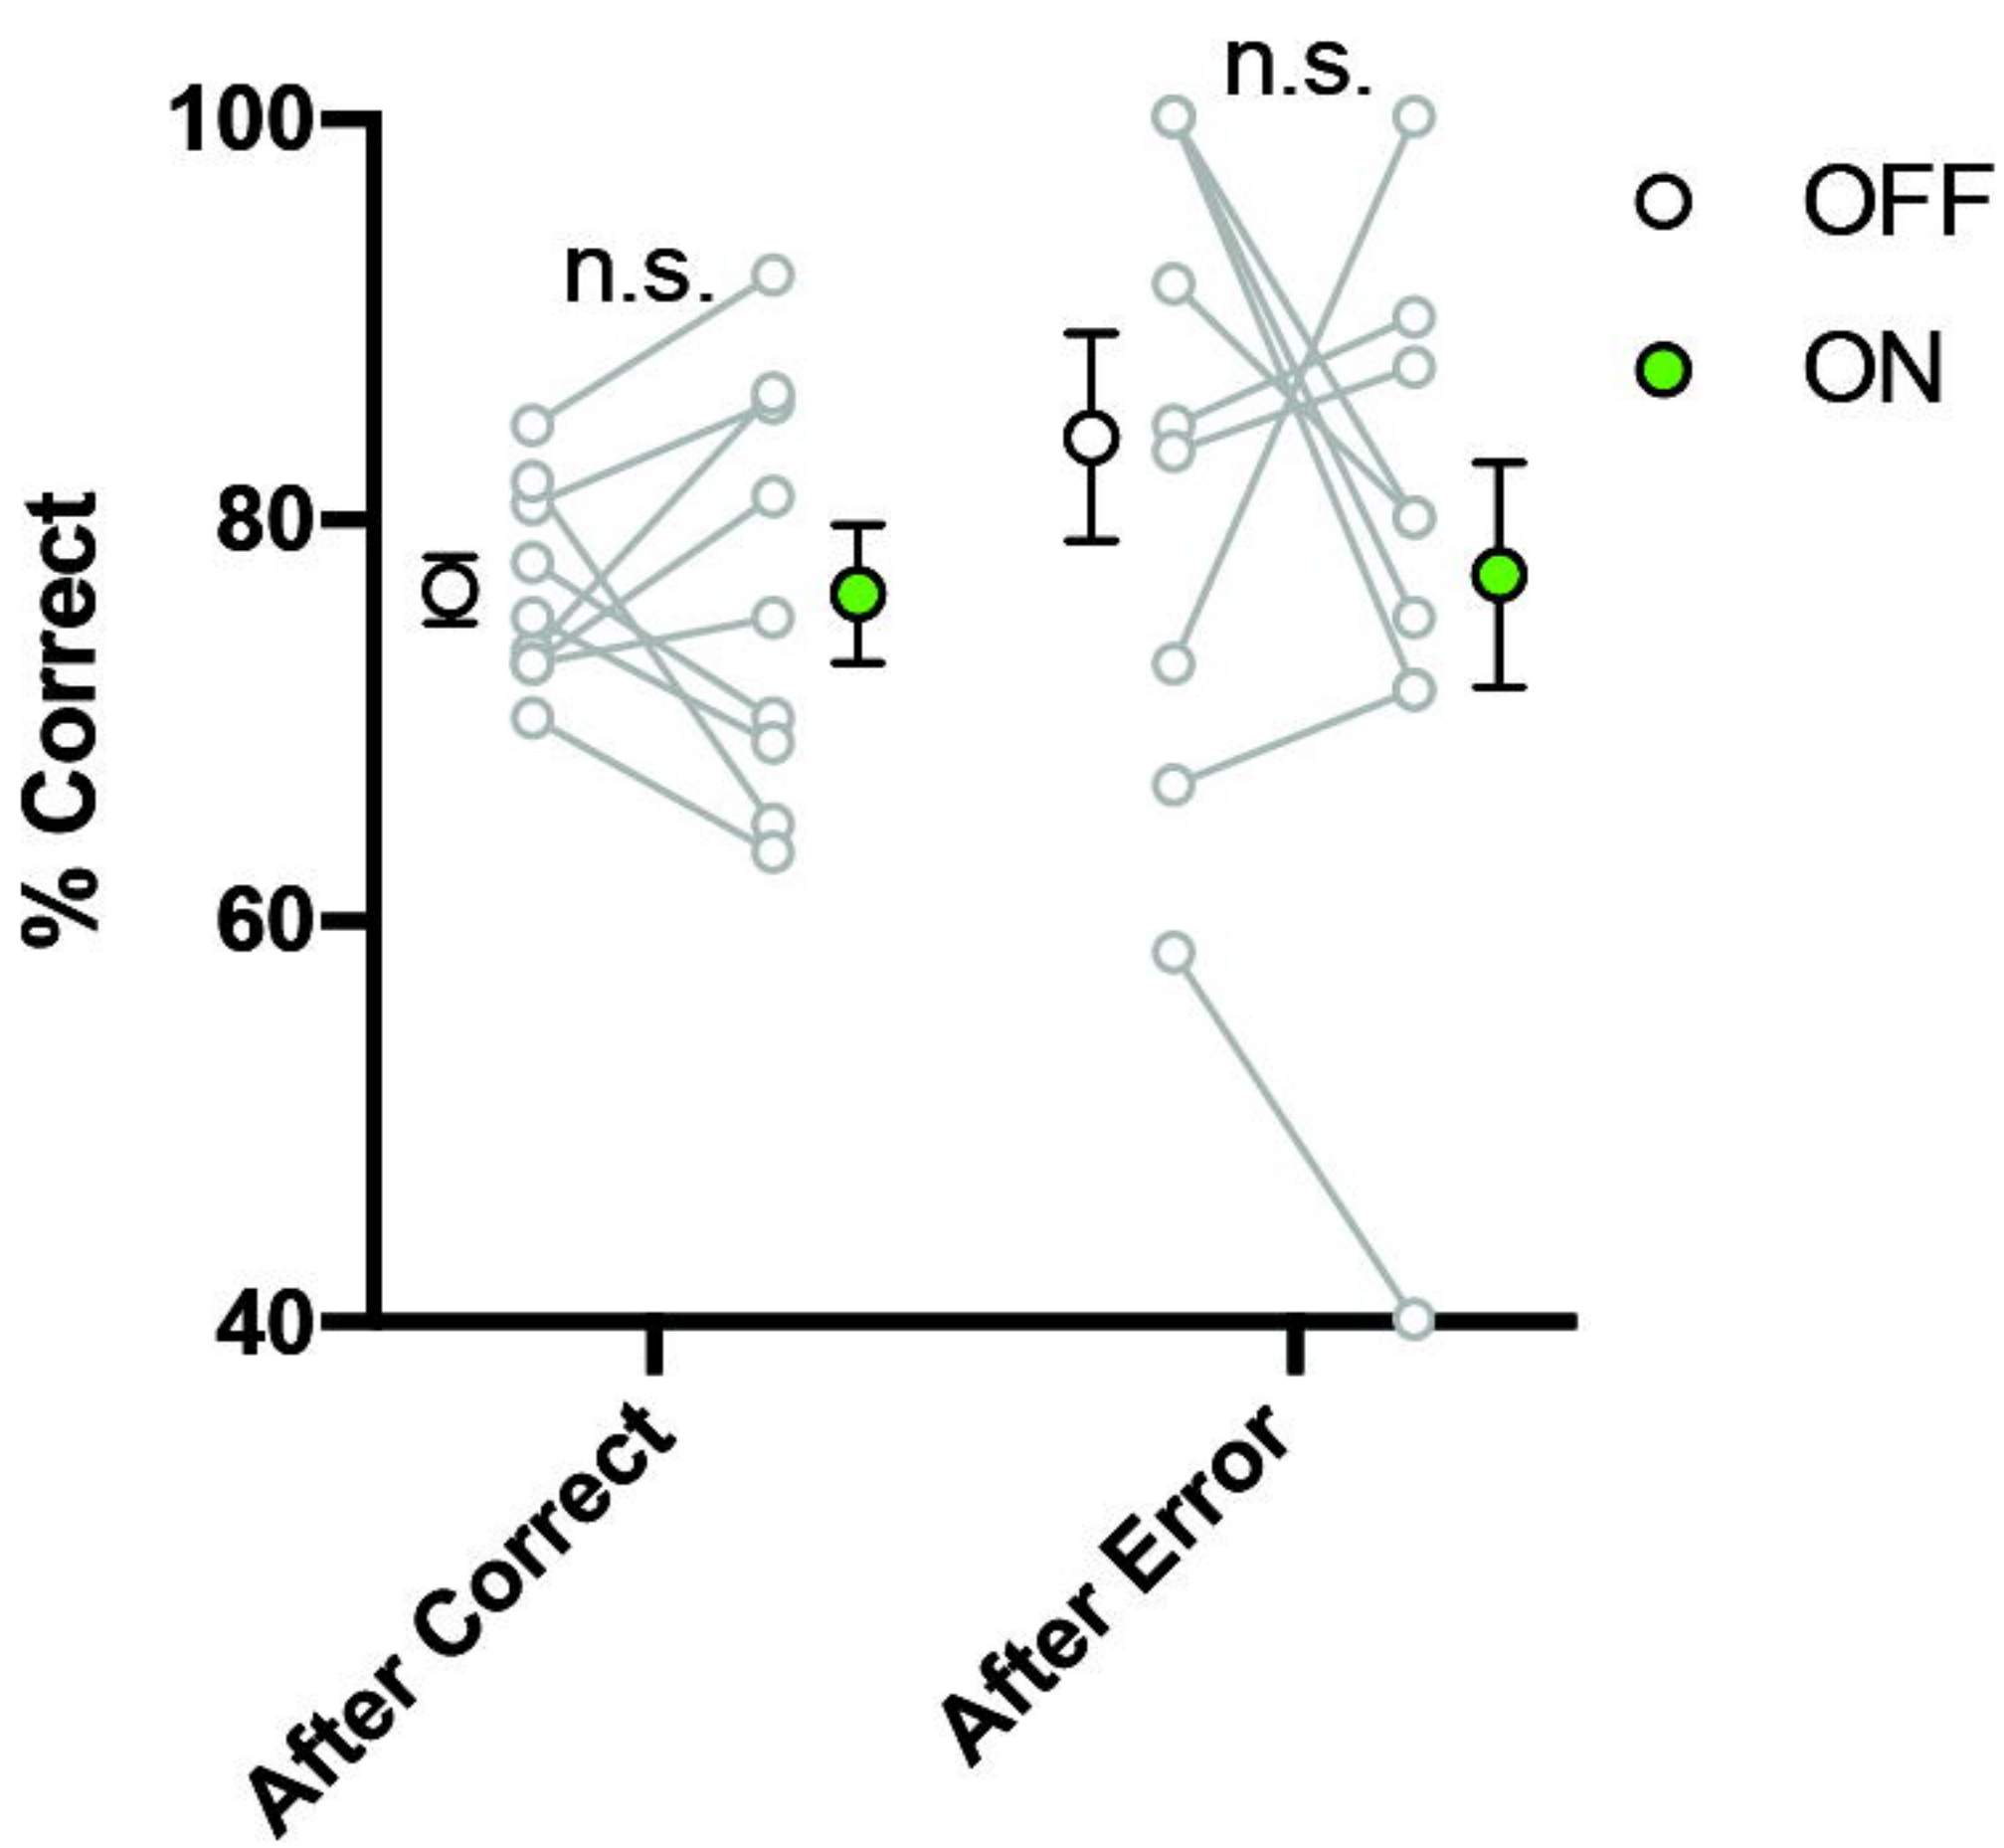

## B ITI Inhibition (eYFP)

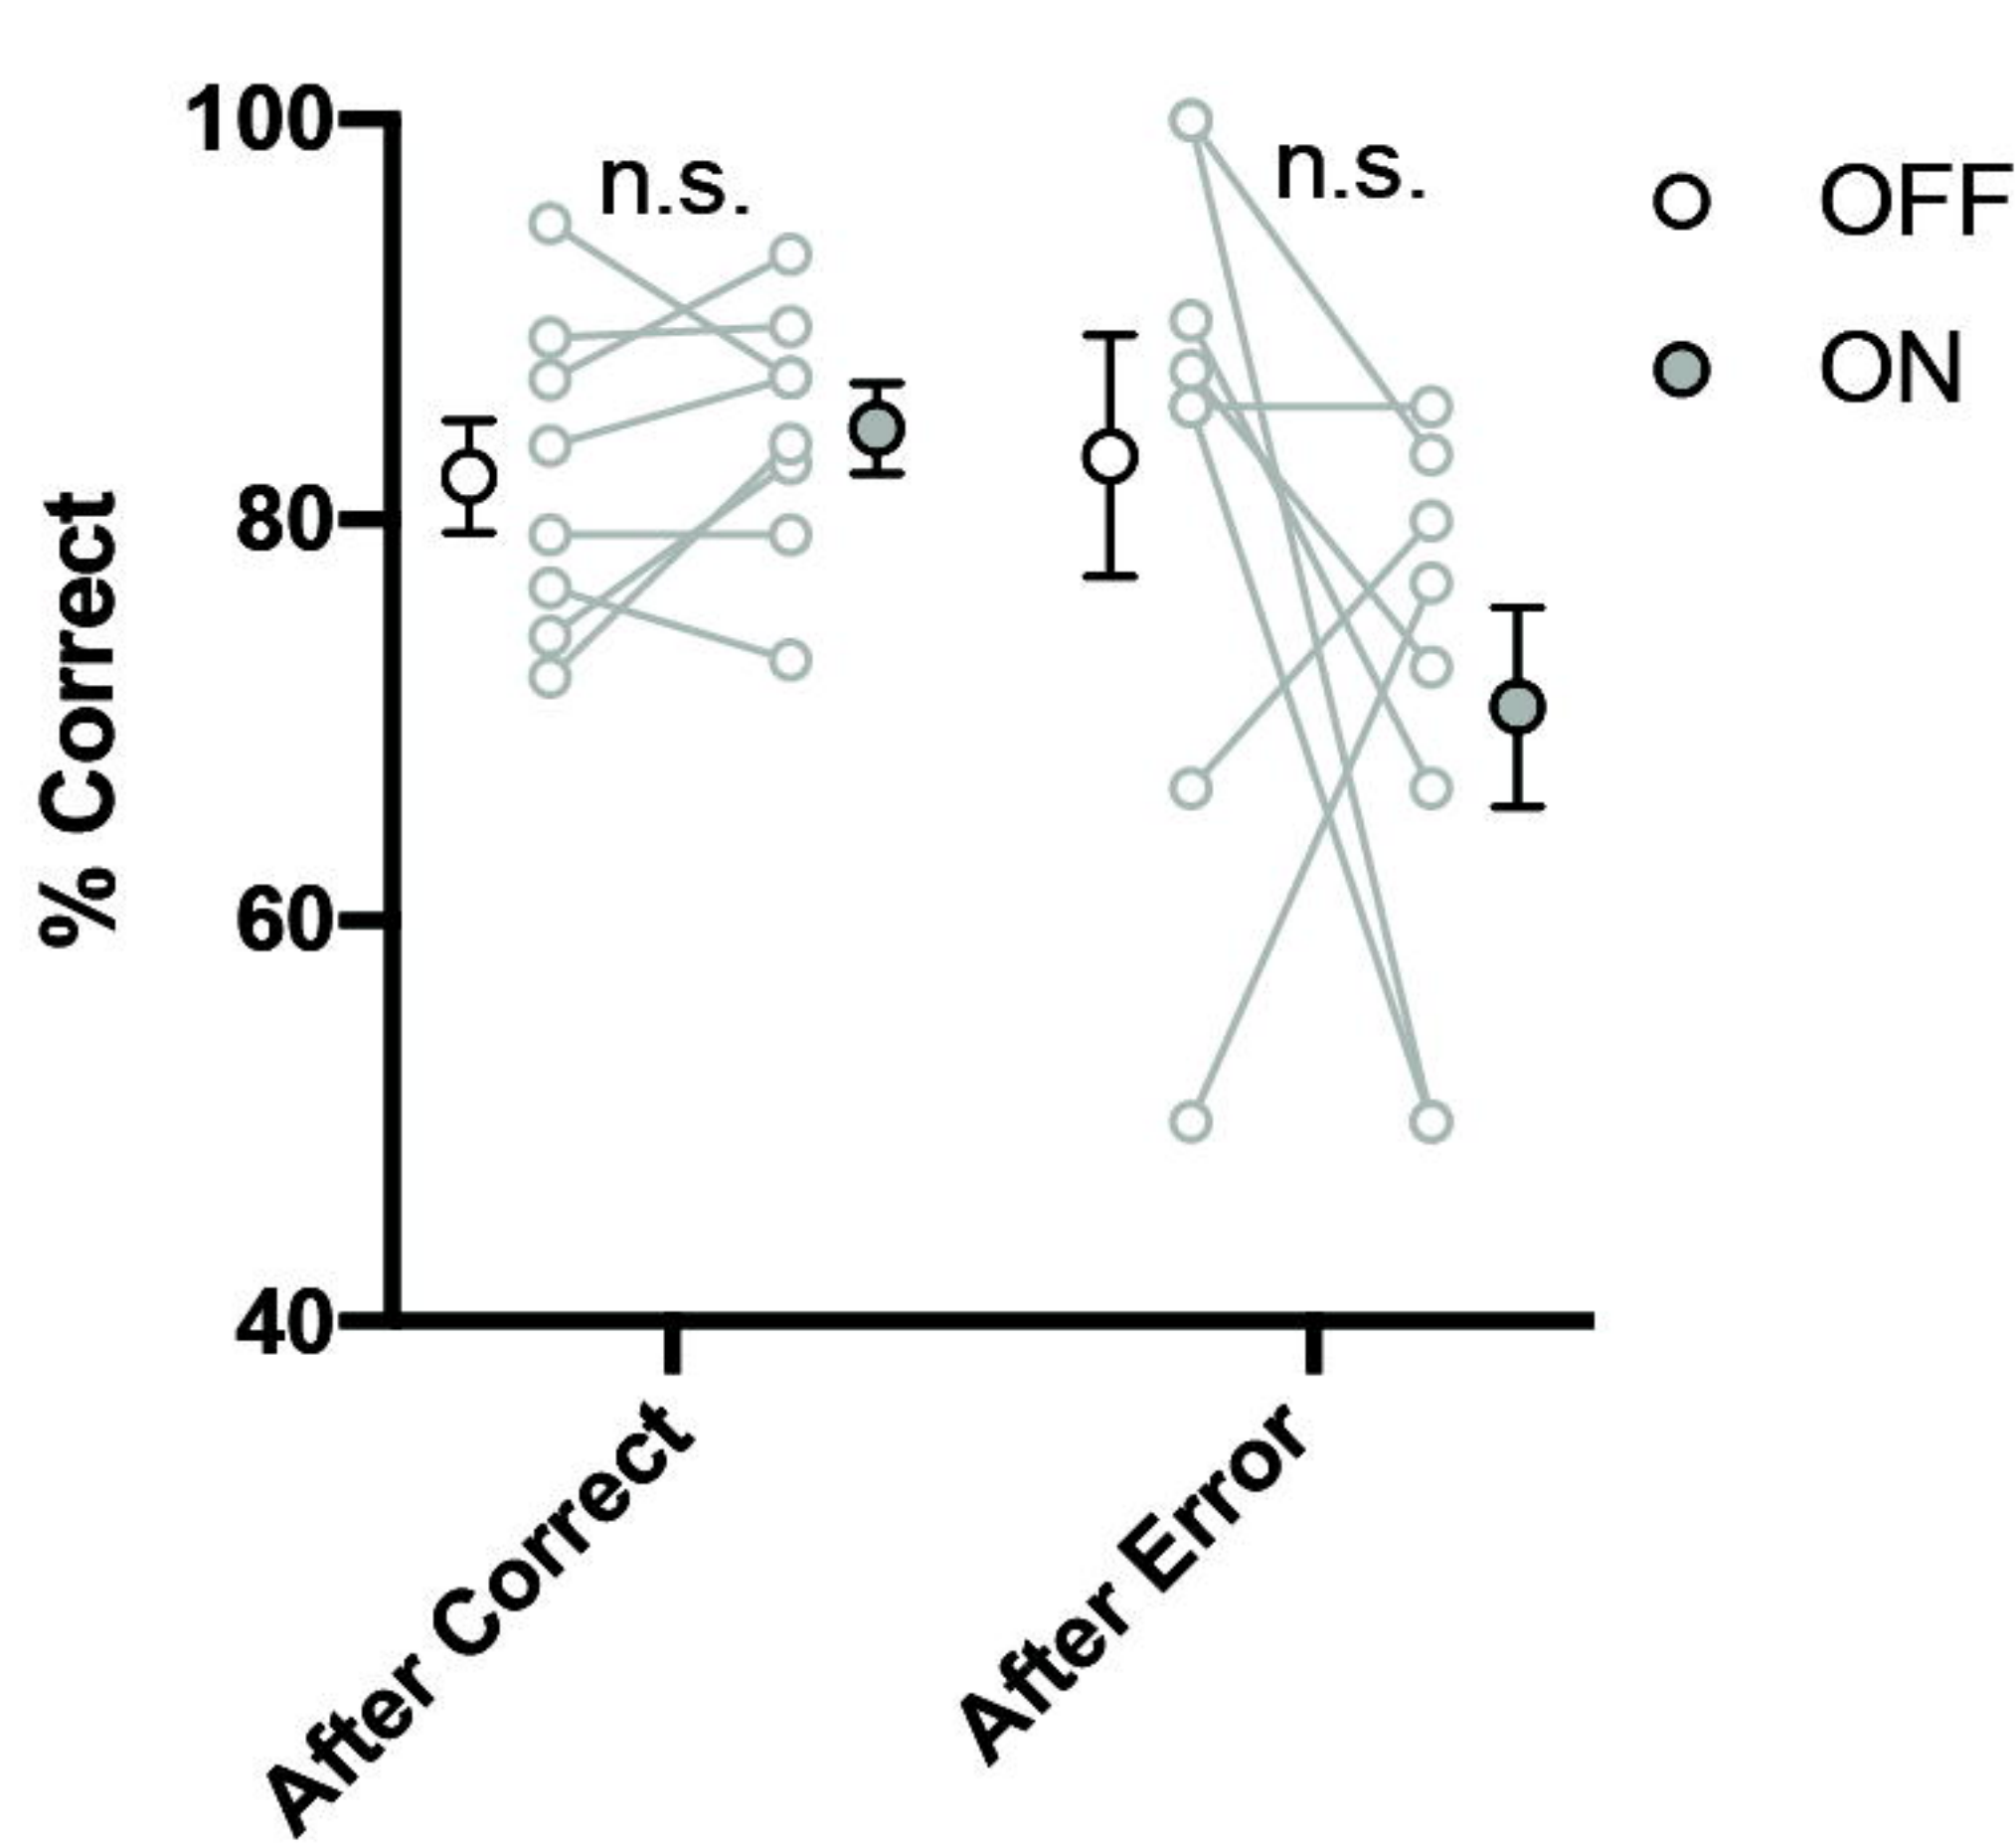

bioRxiv preprint doi: <https://doi.org/10.1101/2021.08.05.455353>; this version posted August 5, 2021. The copyright holder for this preprint (which was not certified by peer review) is the author/funder, who has granted bioRxiv a license to display the preprint in perpetuity. It is made available under aCC-BY-NC-ND 4.0 International license.

## C Cue Inhibition (ArchT)

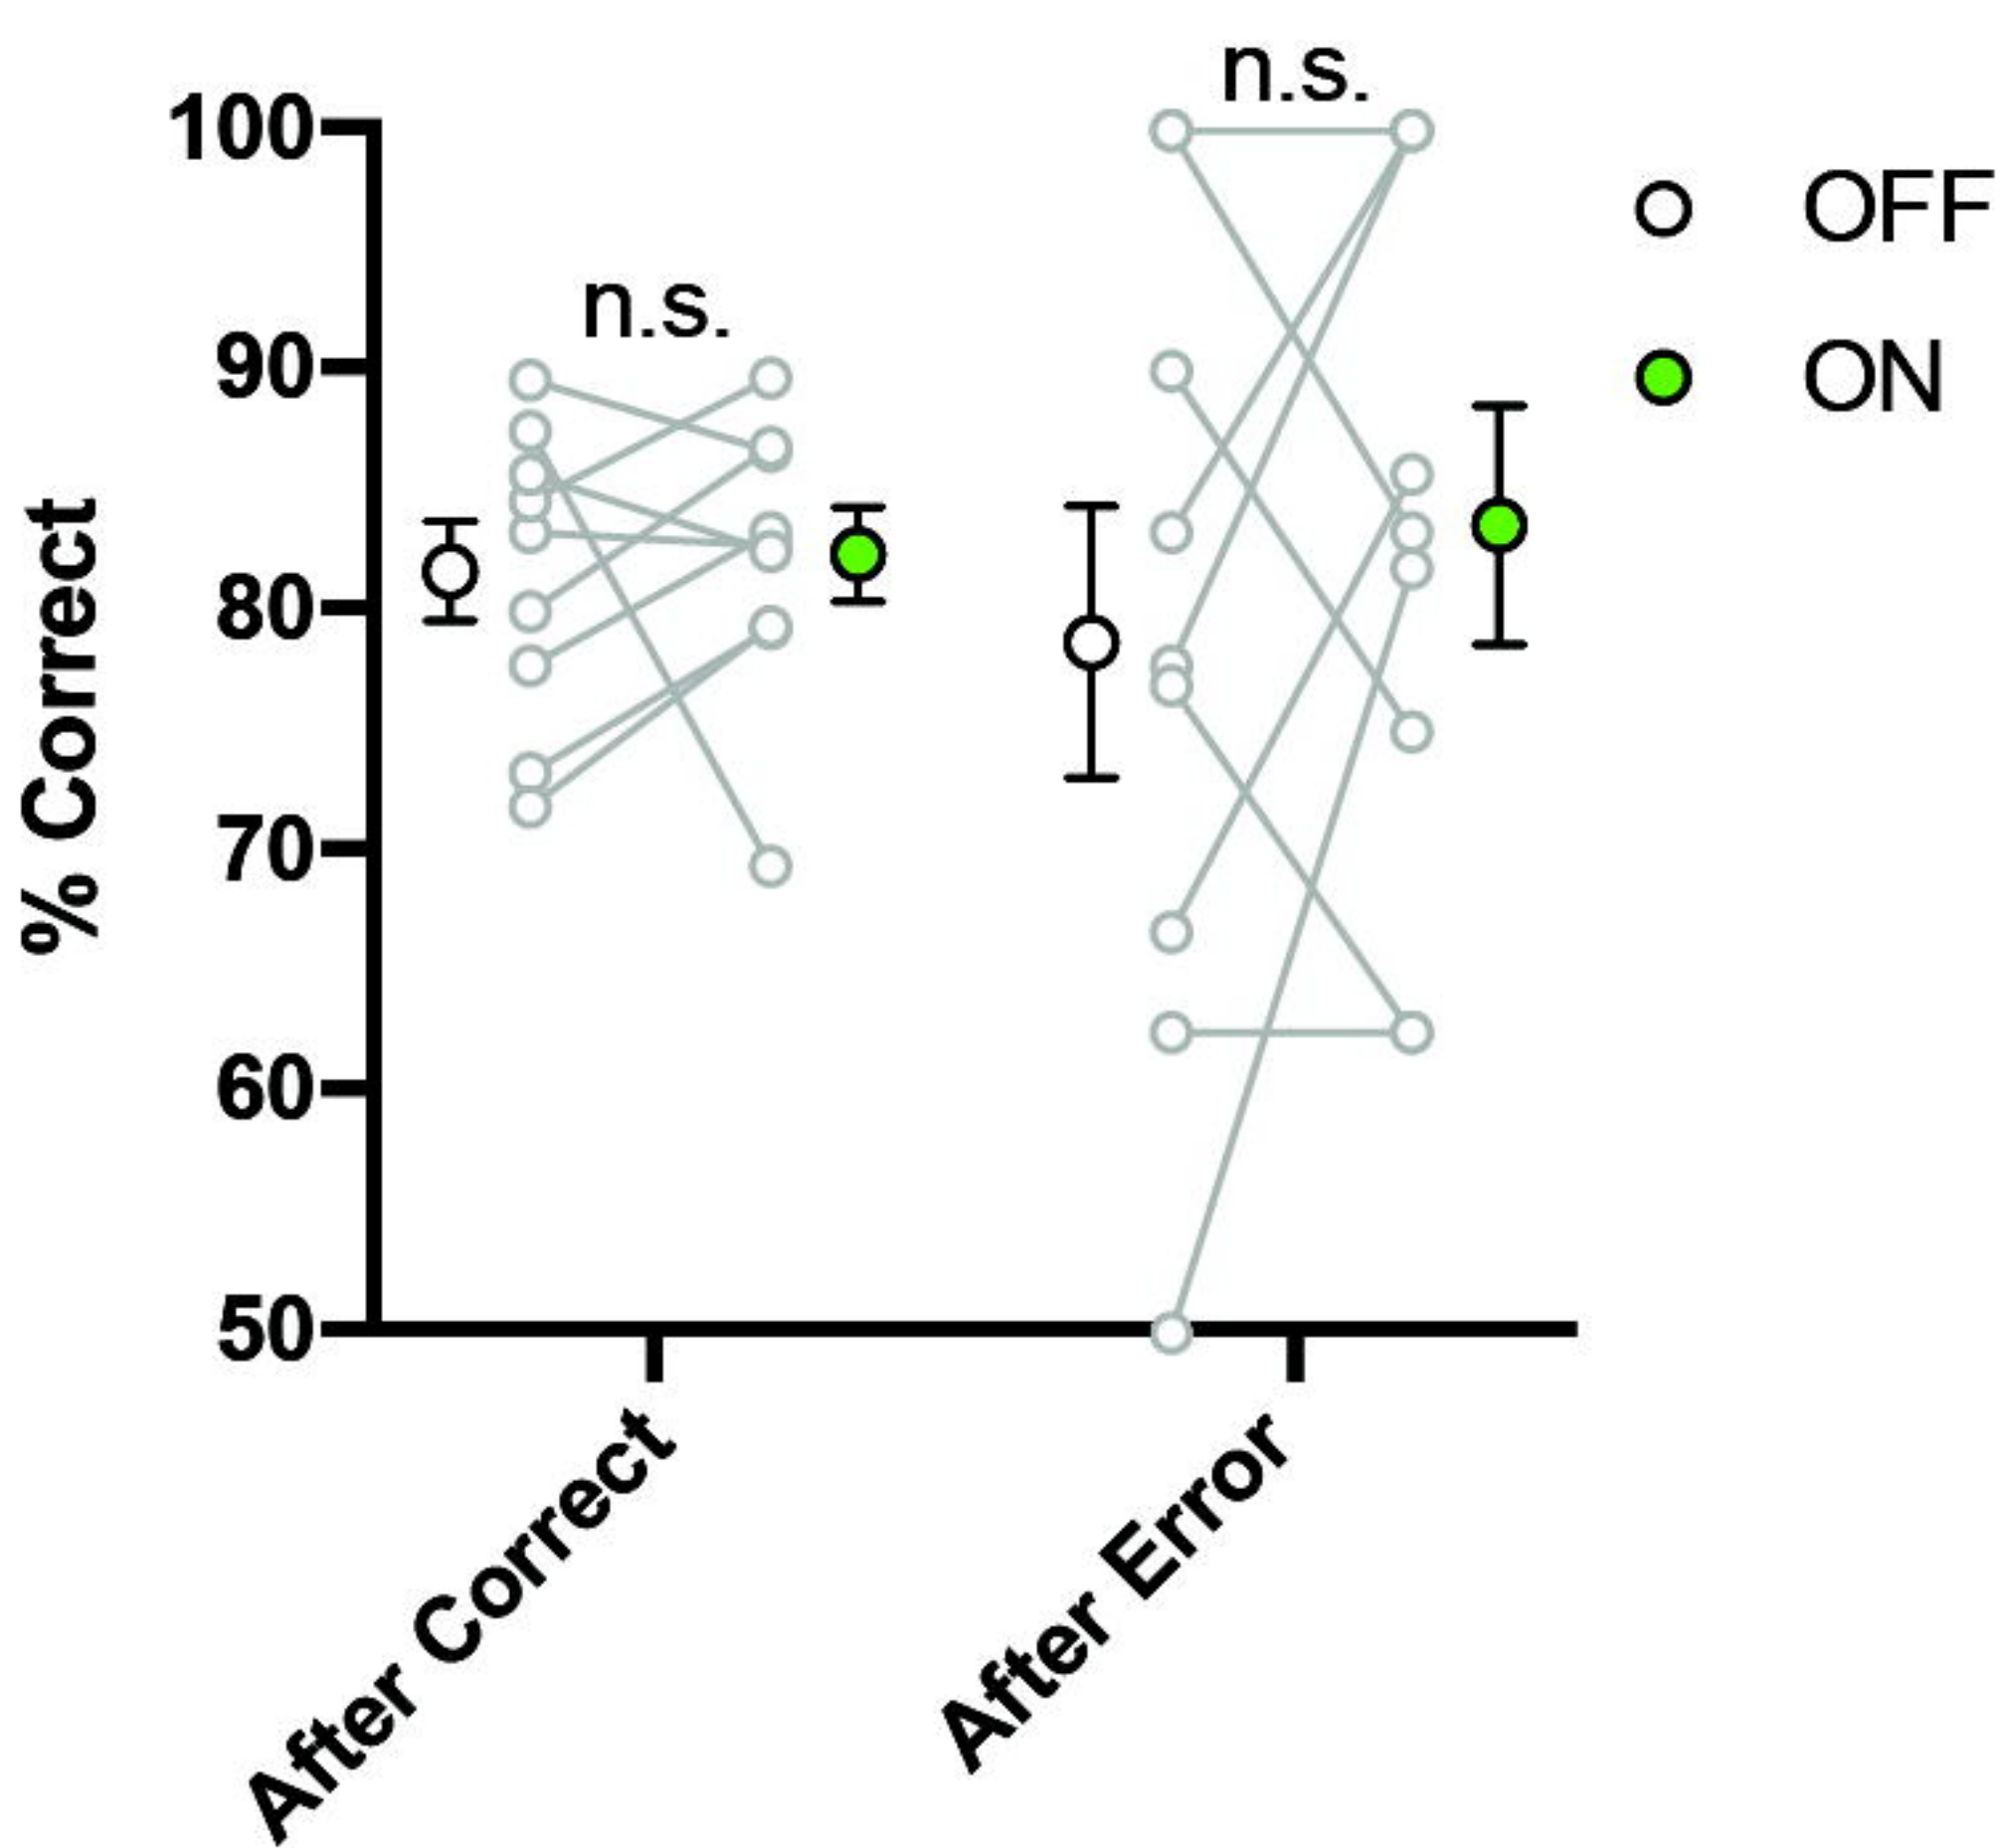

## D Cue Inhibition (eYFP)

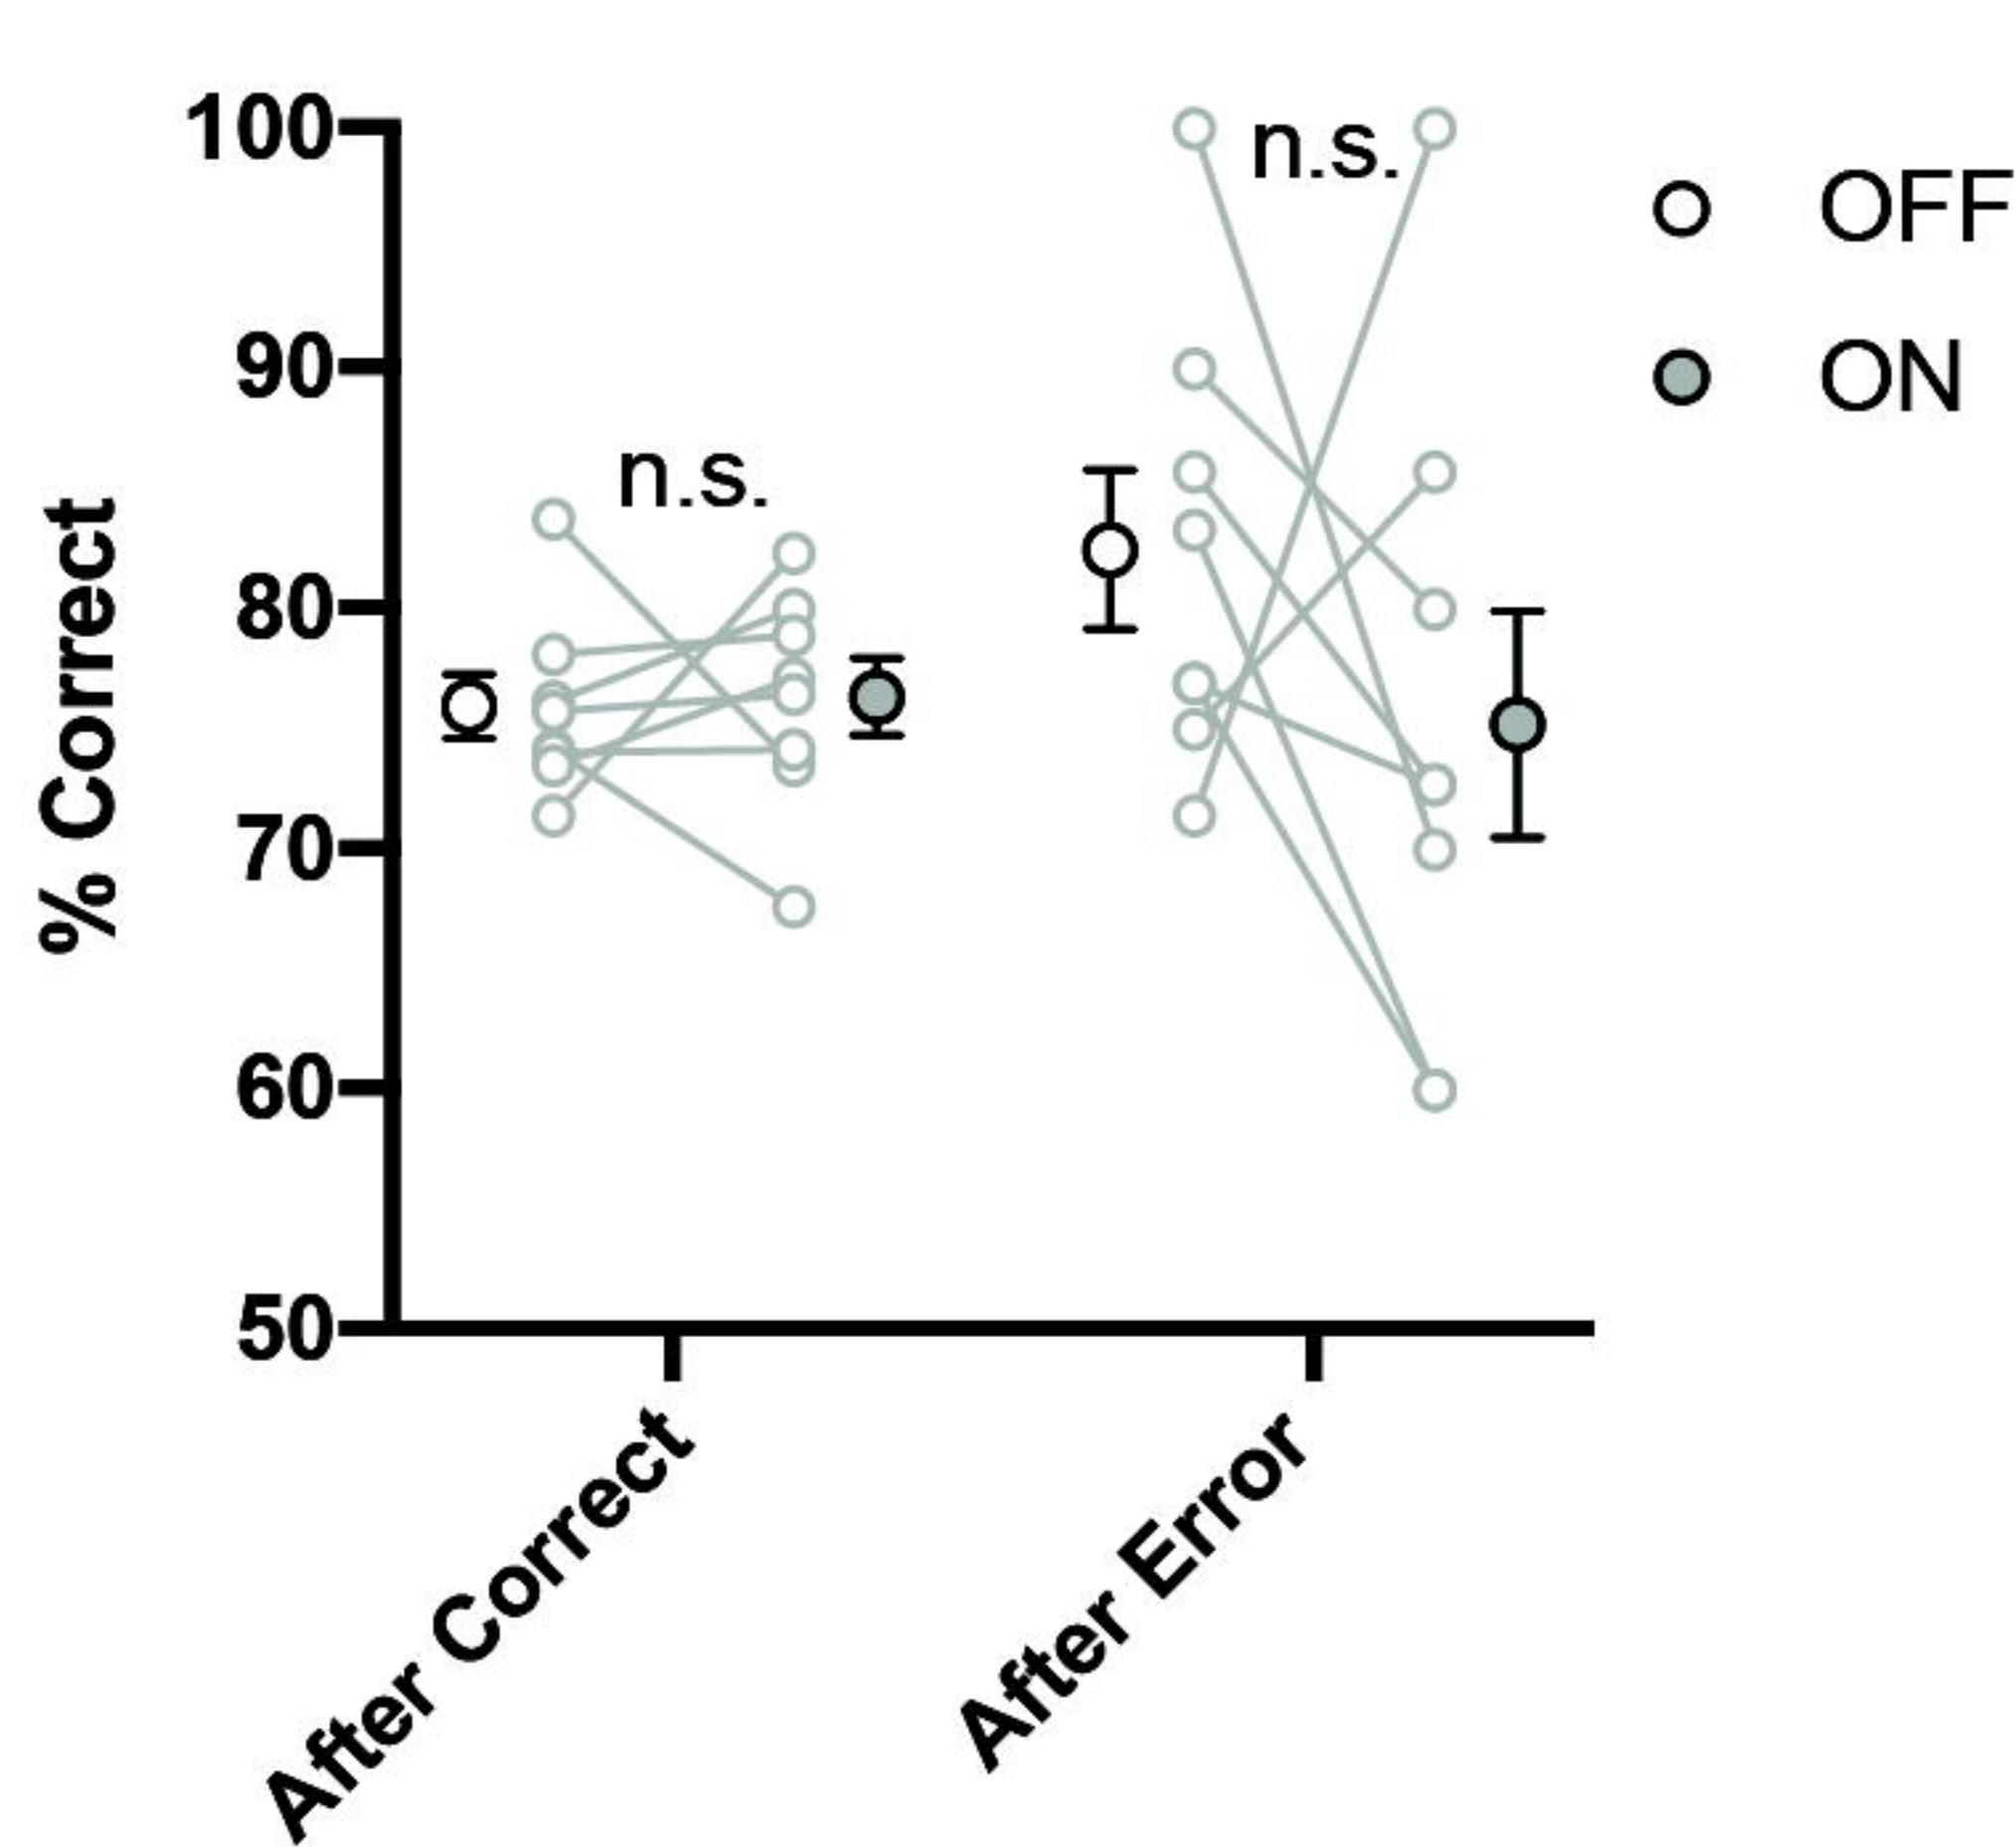

# Supplementary Figure S6 Nishioka et al.

## A ITI Inhibition (ArchT)

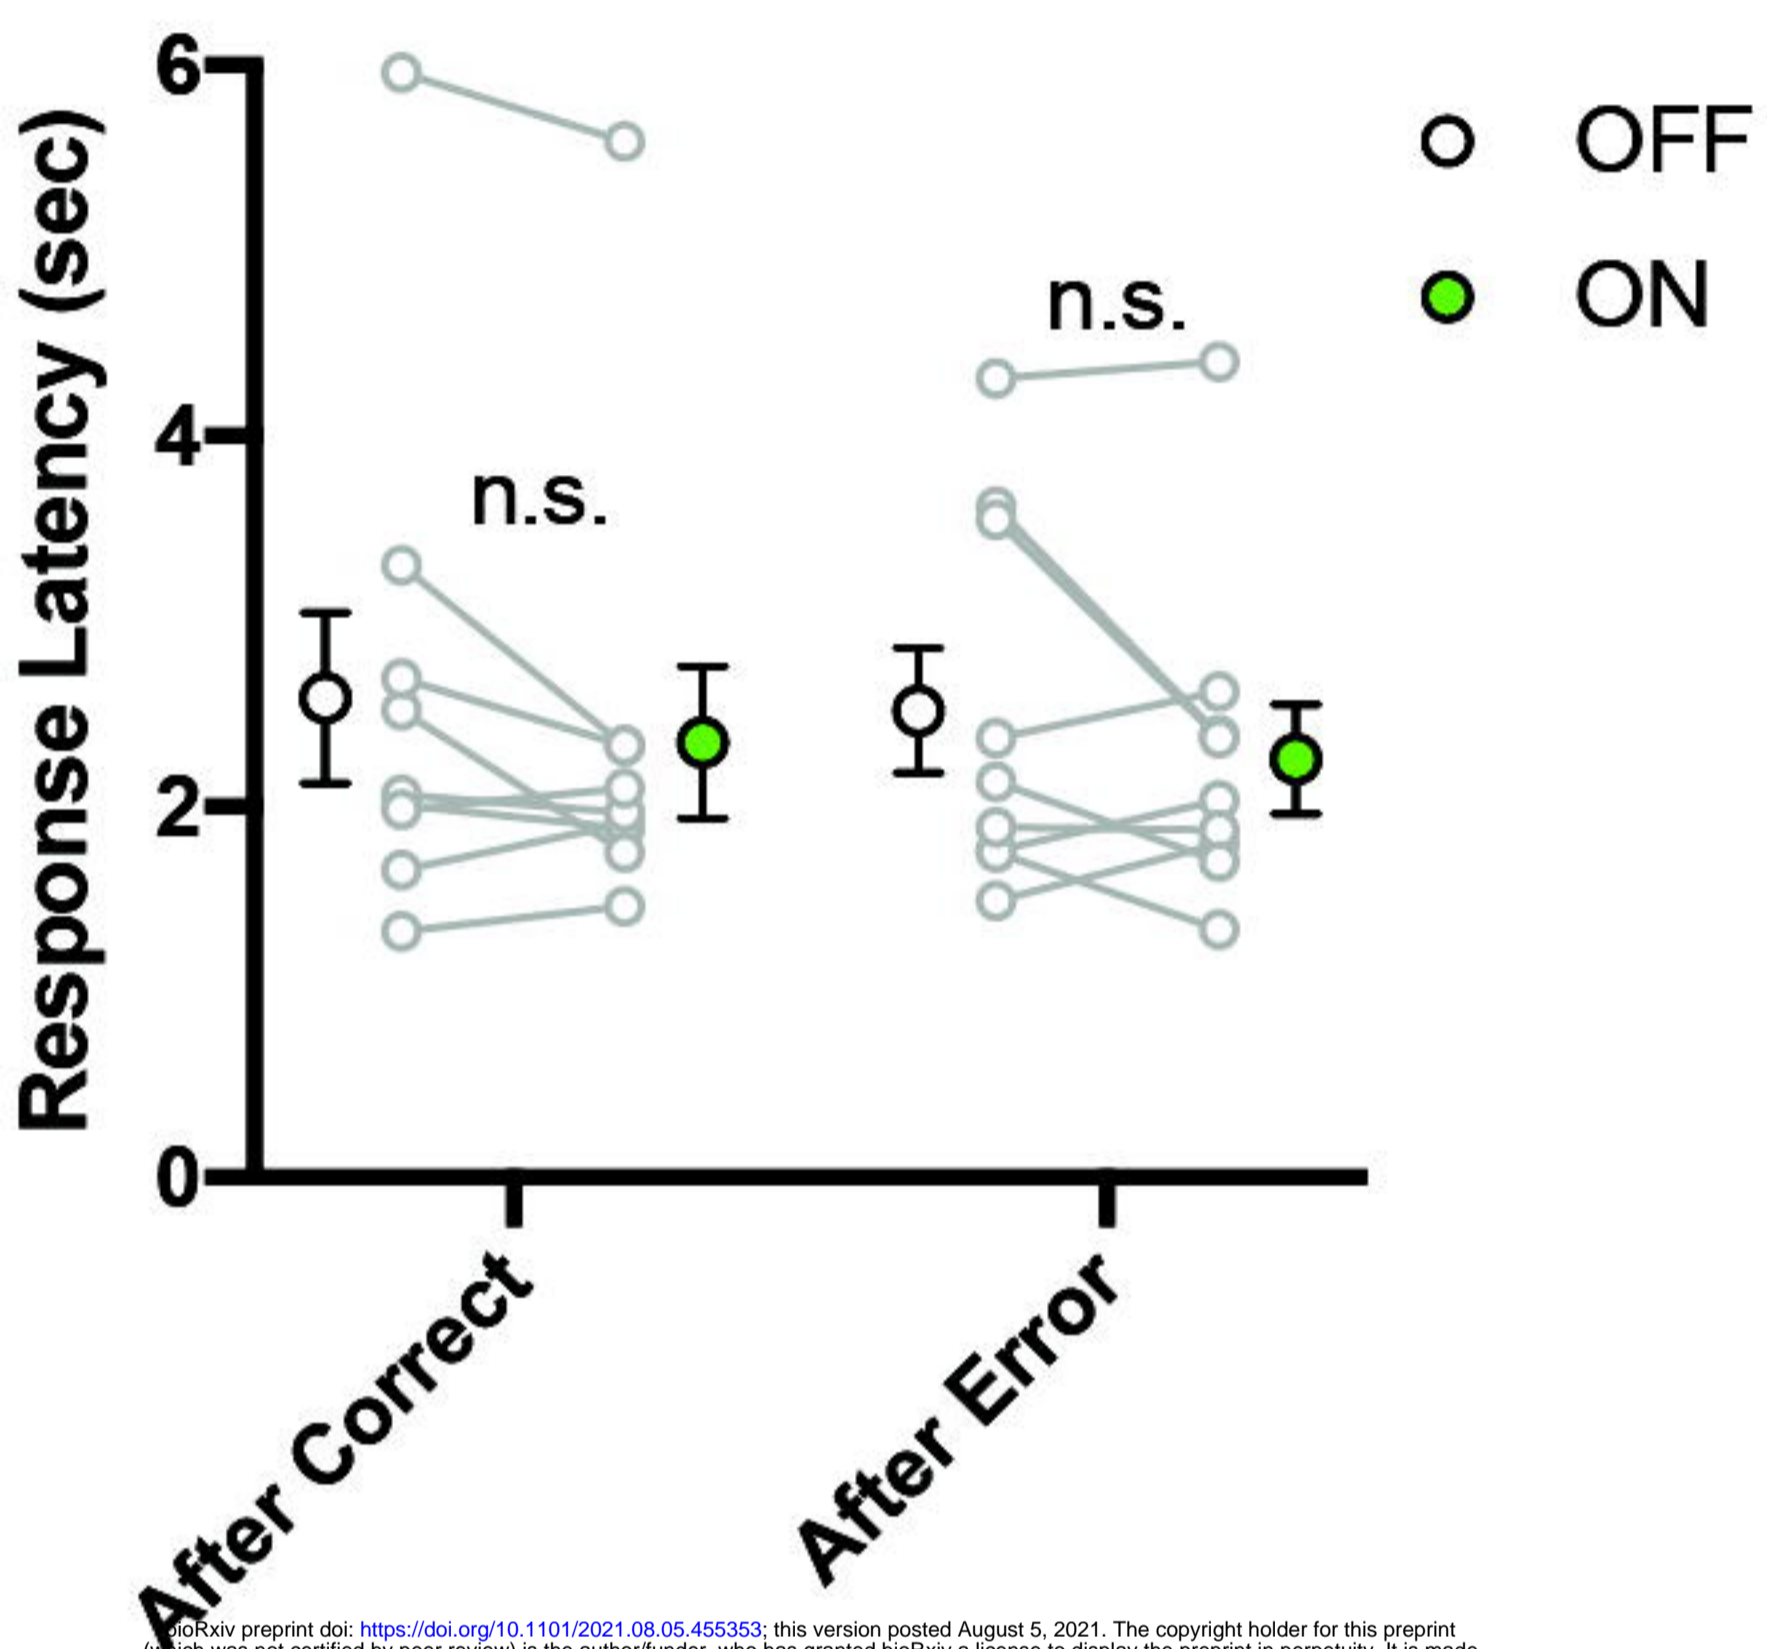

## C Cue Inhibition (ArchT)

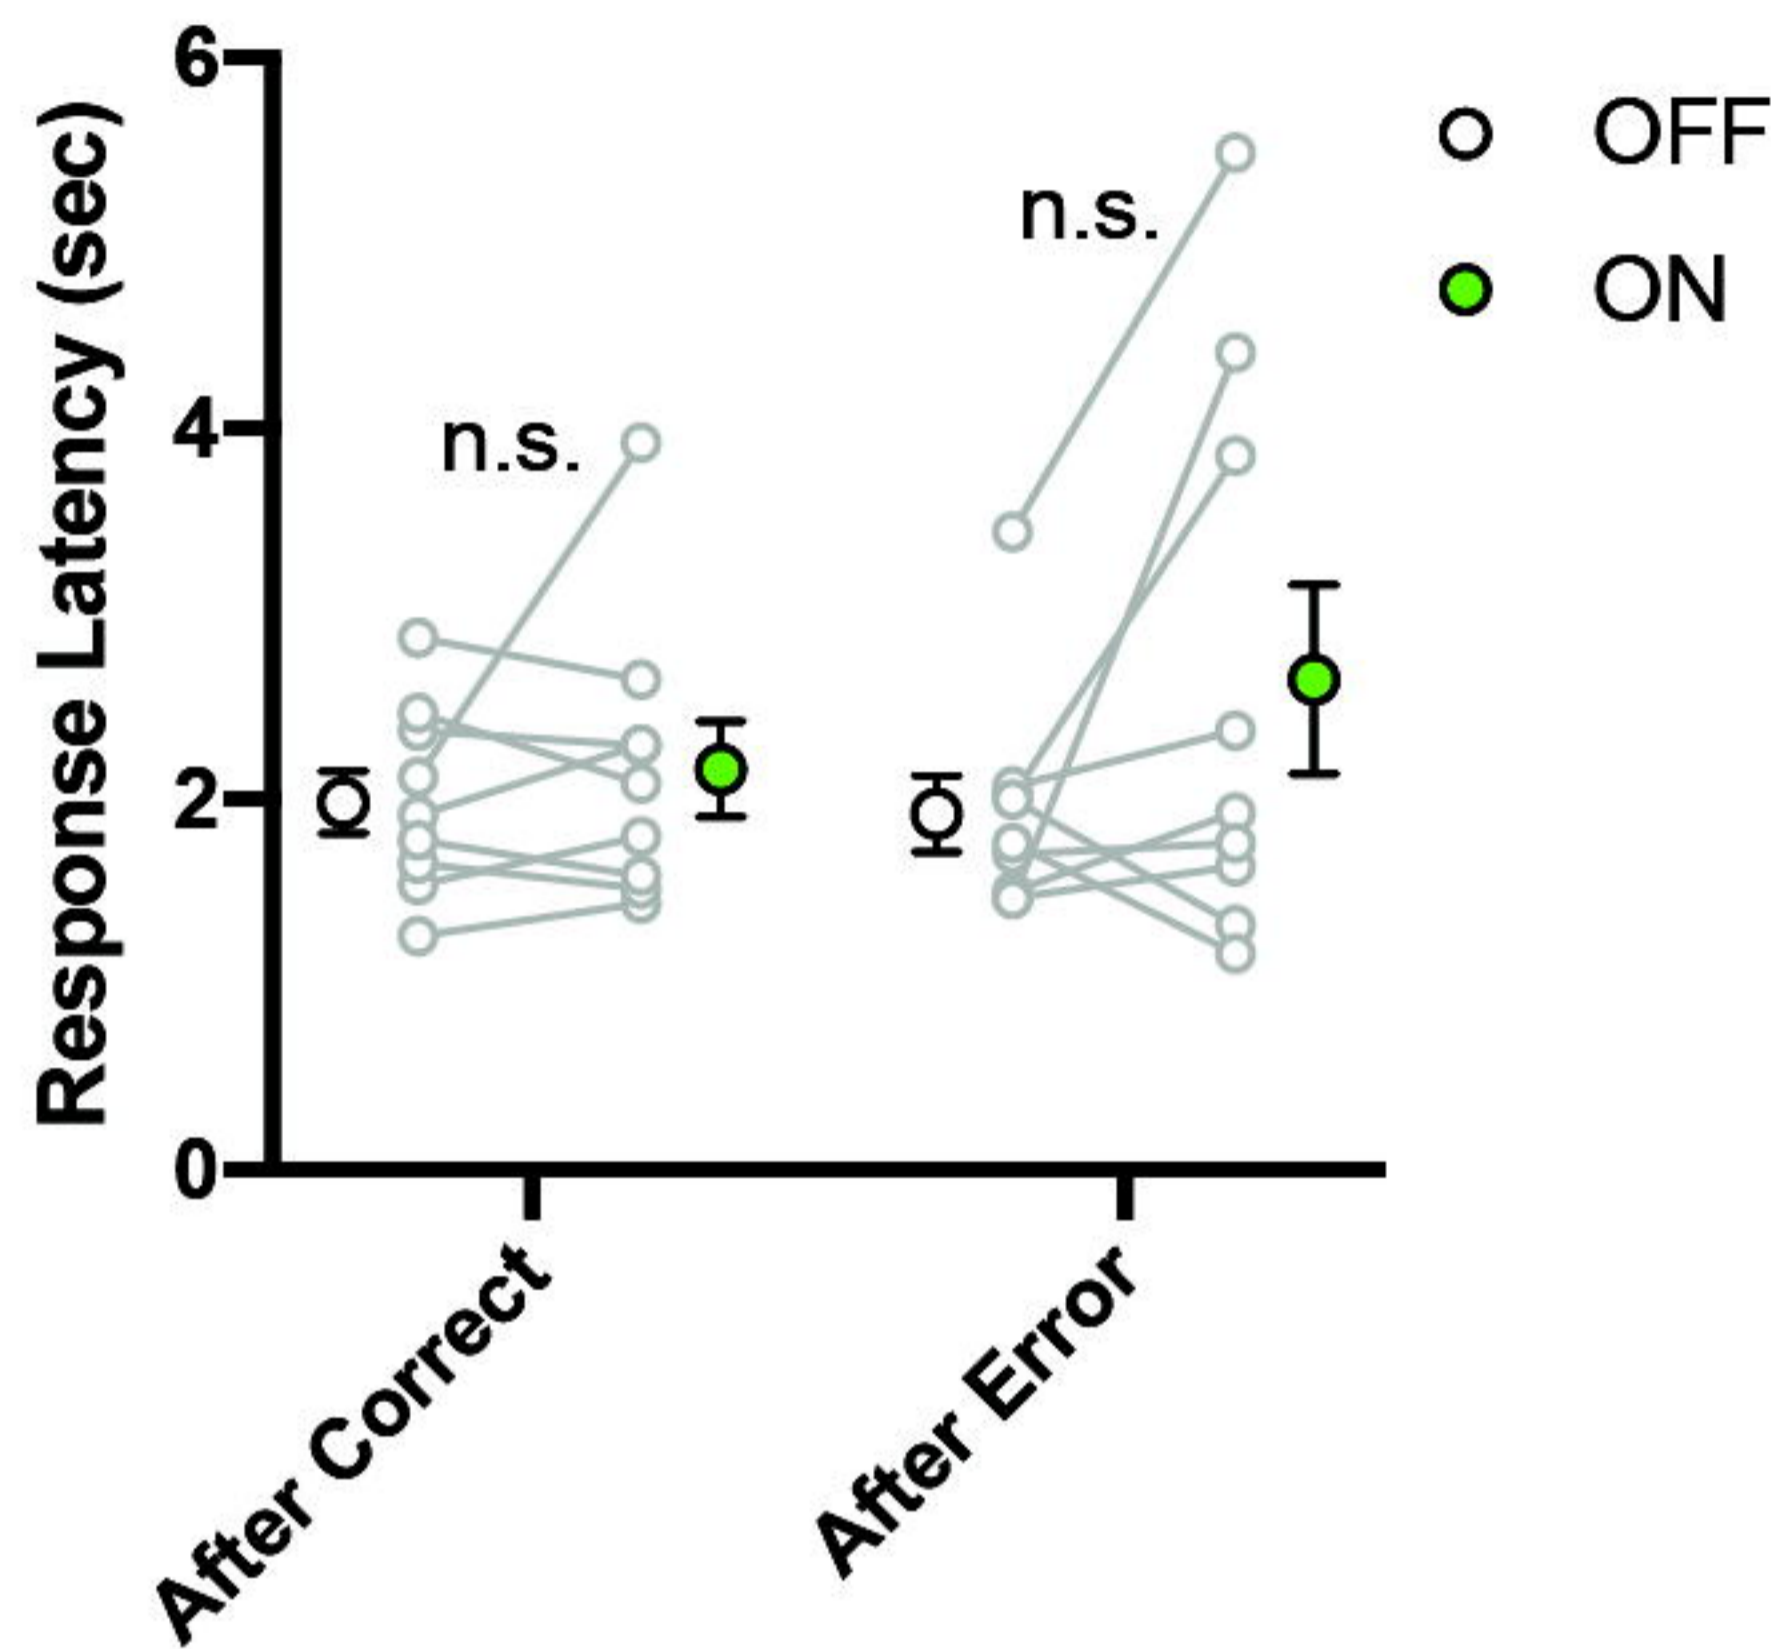

## E Outcome Inhibition (ArchT)

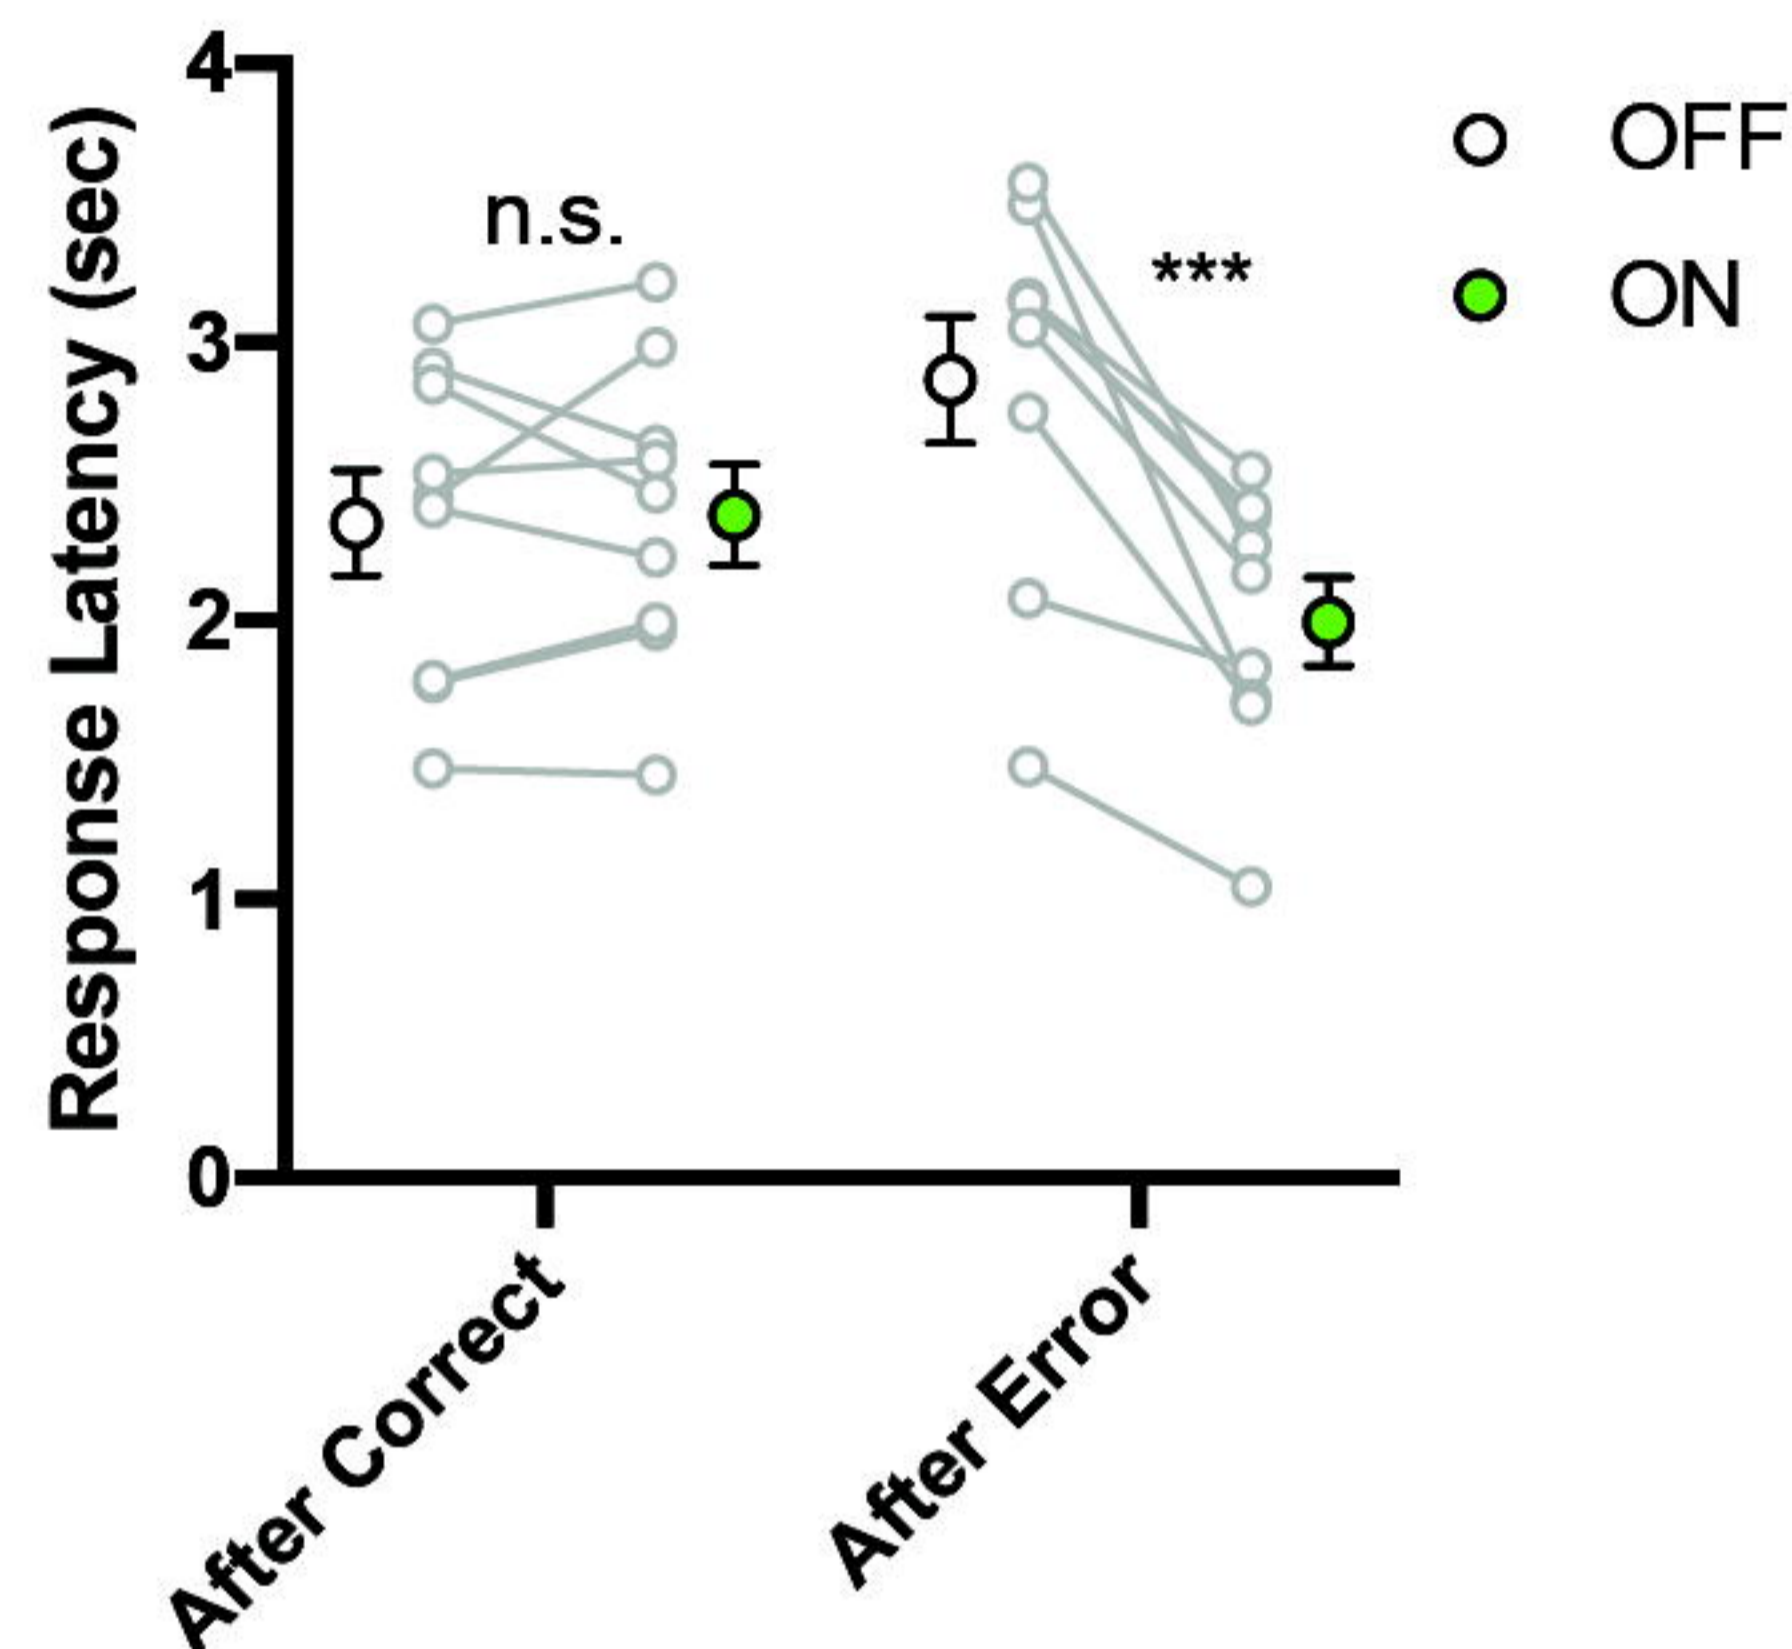

## B ITI Inhibition (eYFP)

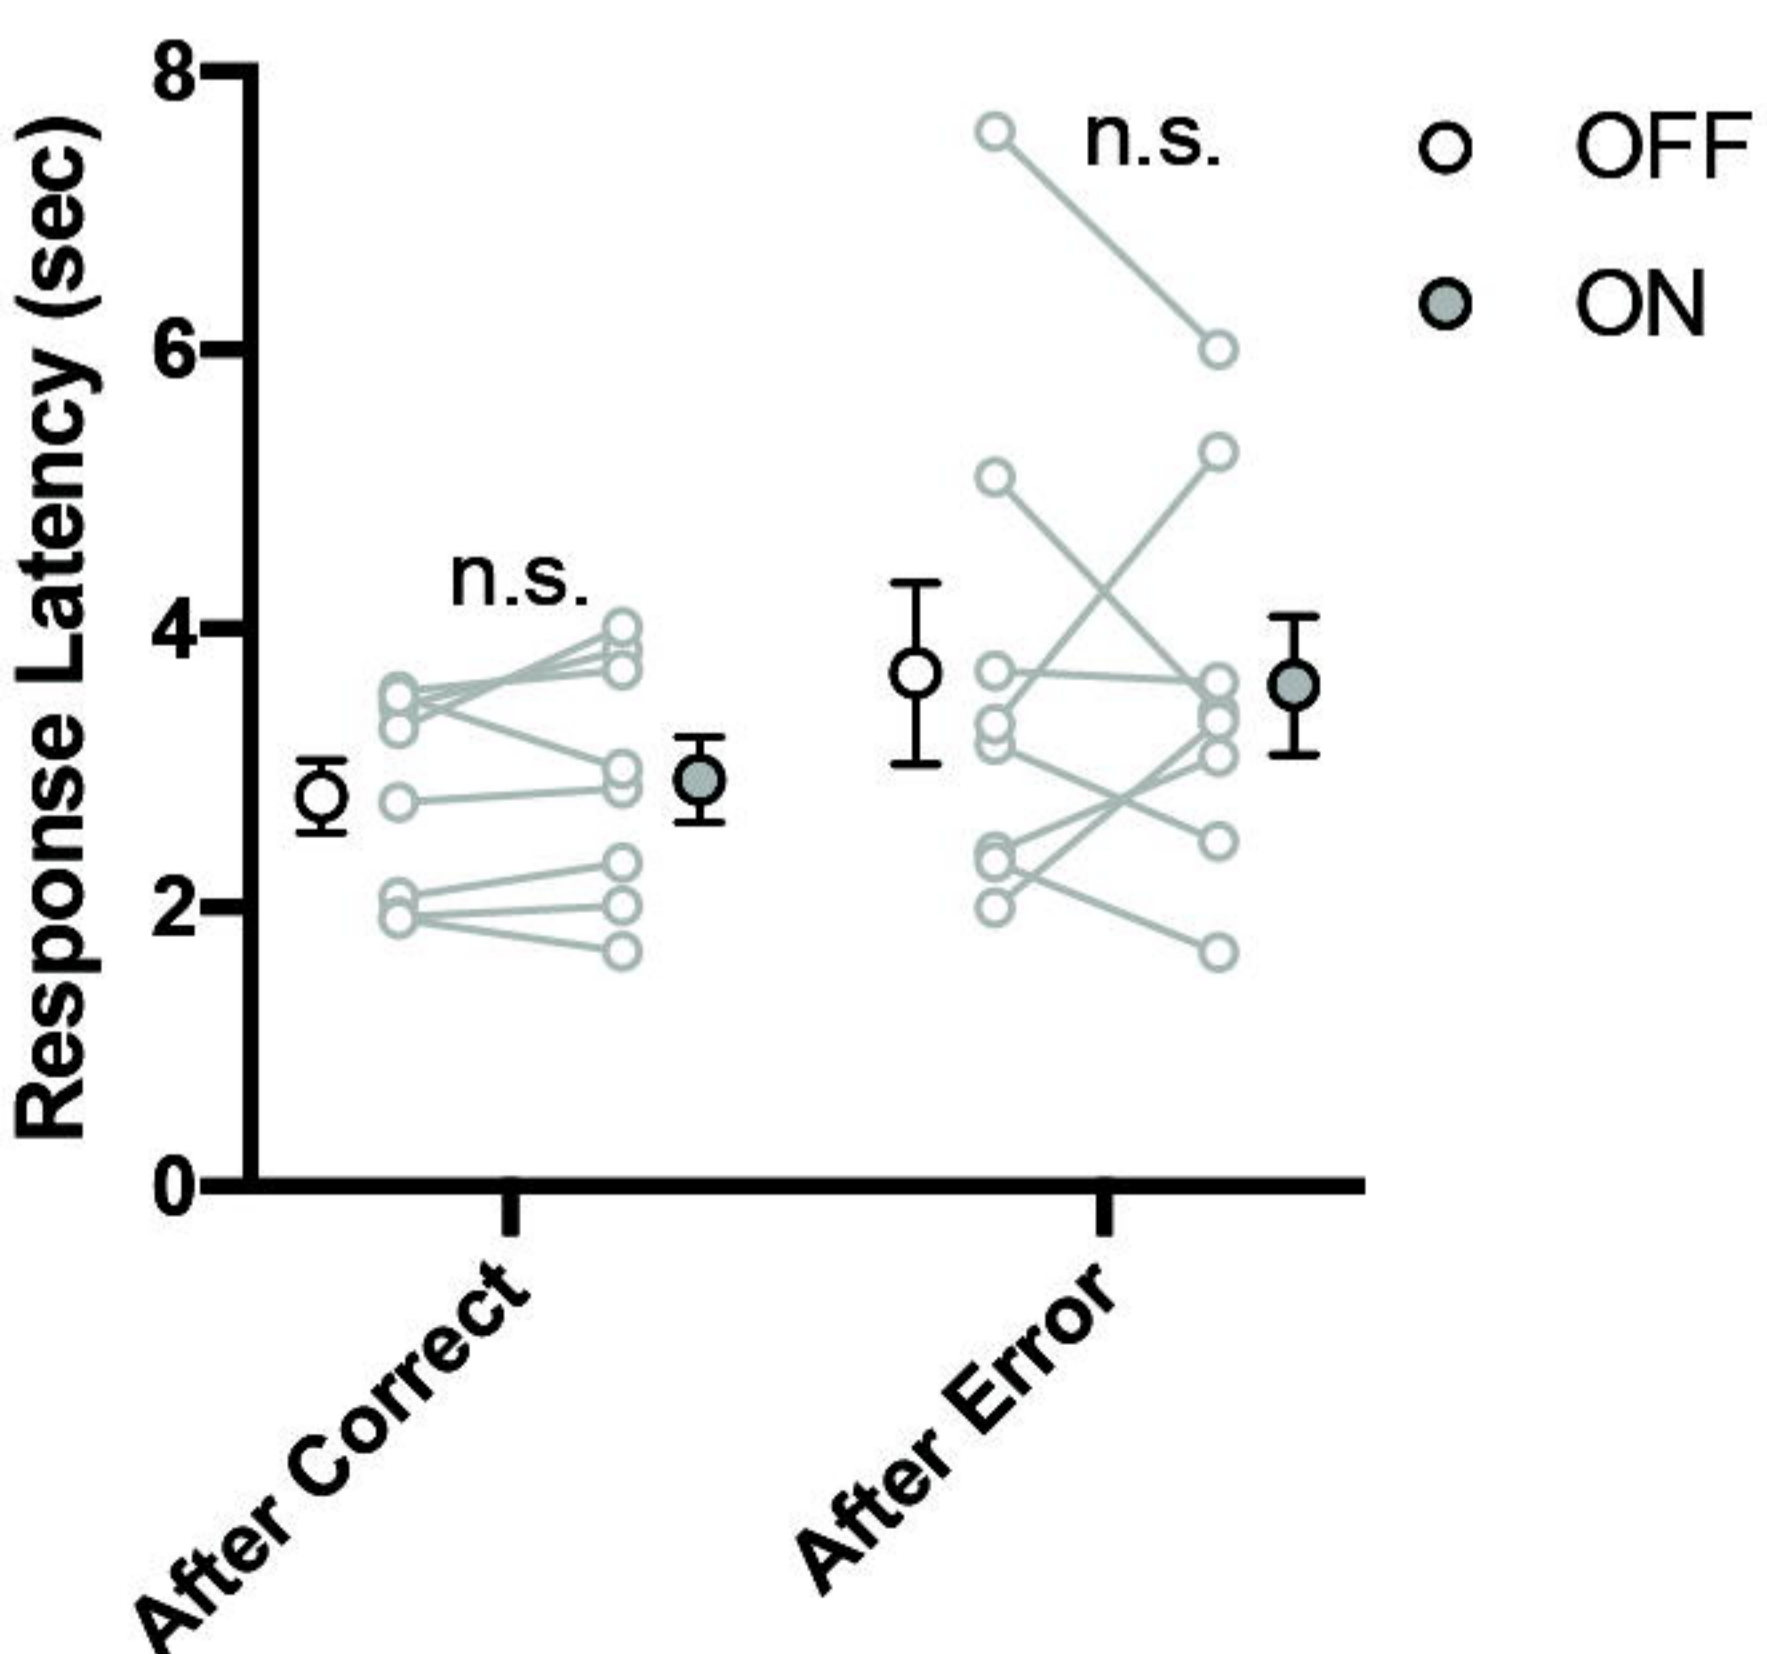

## D Cue Inhibition (eYFP)

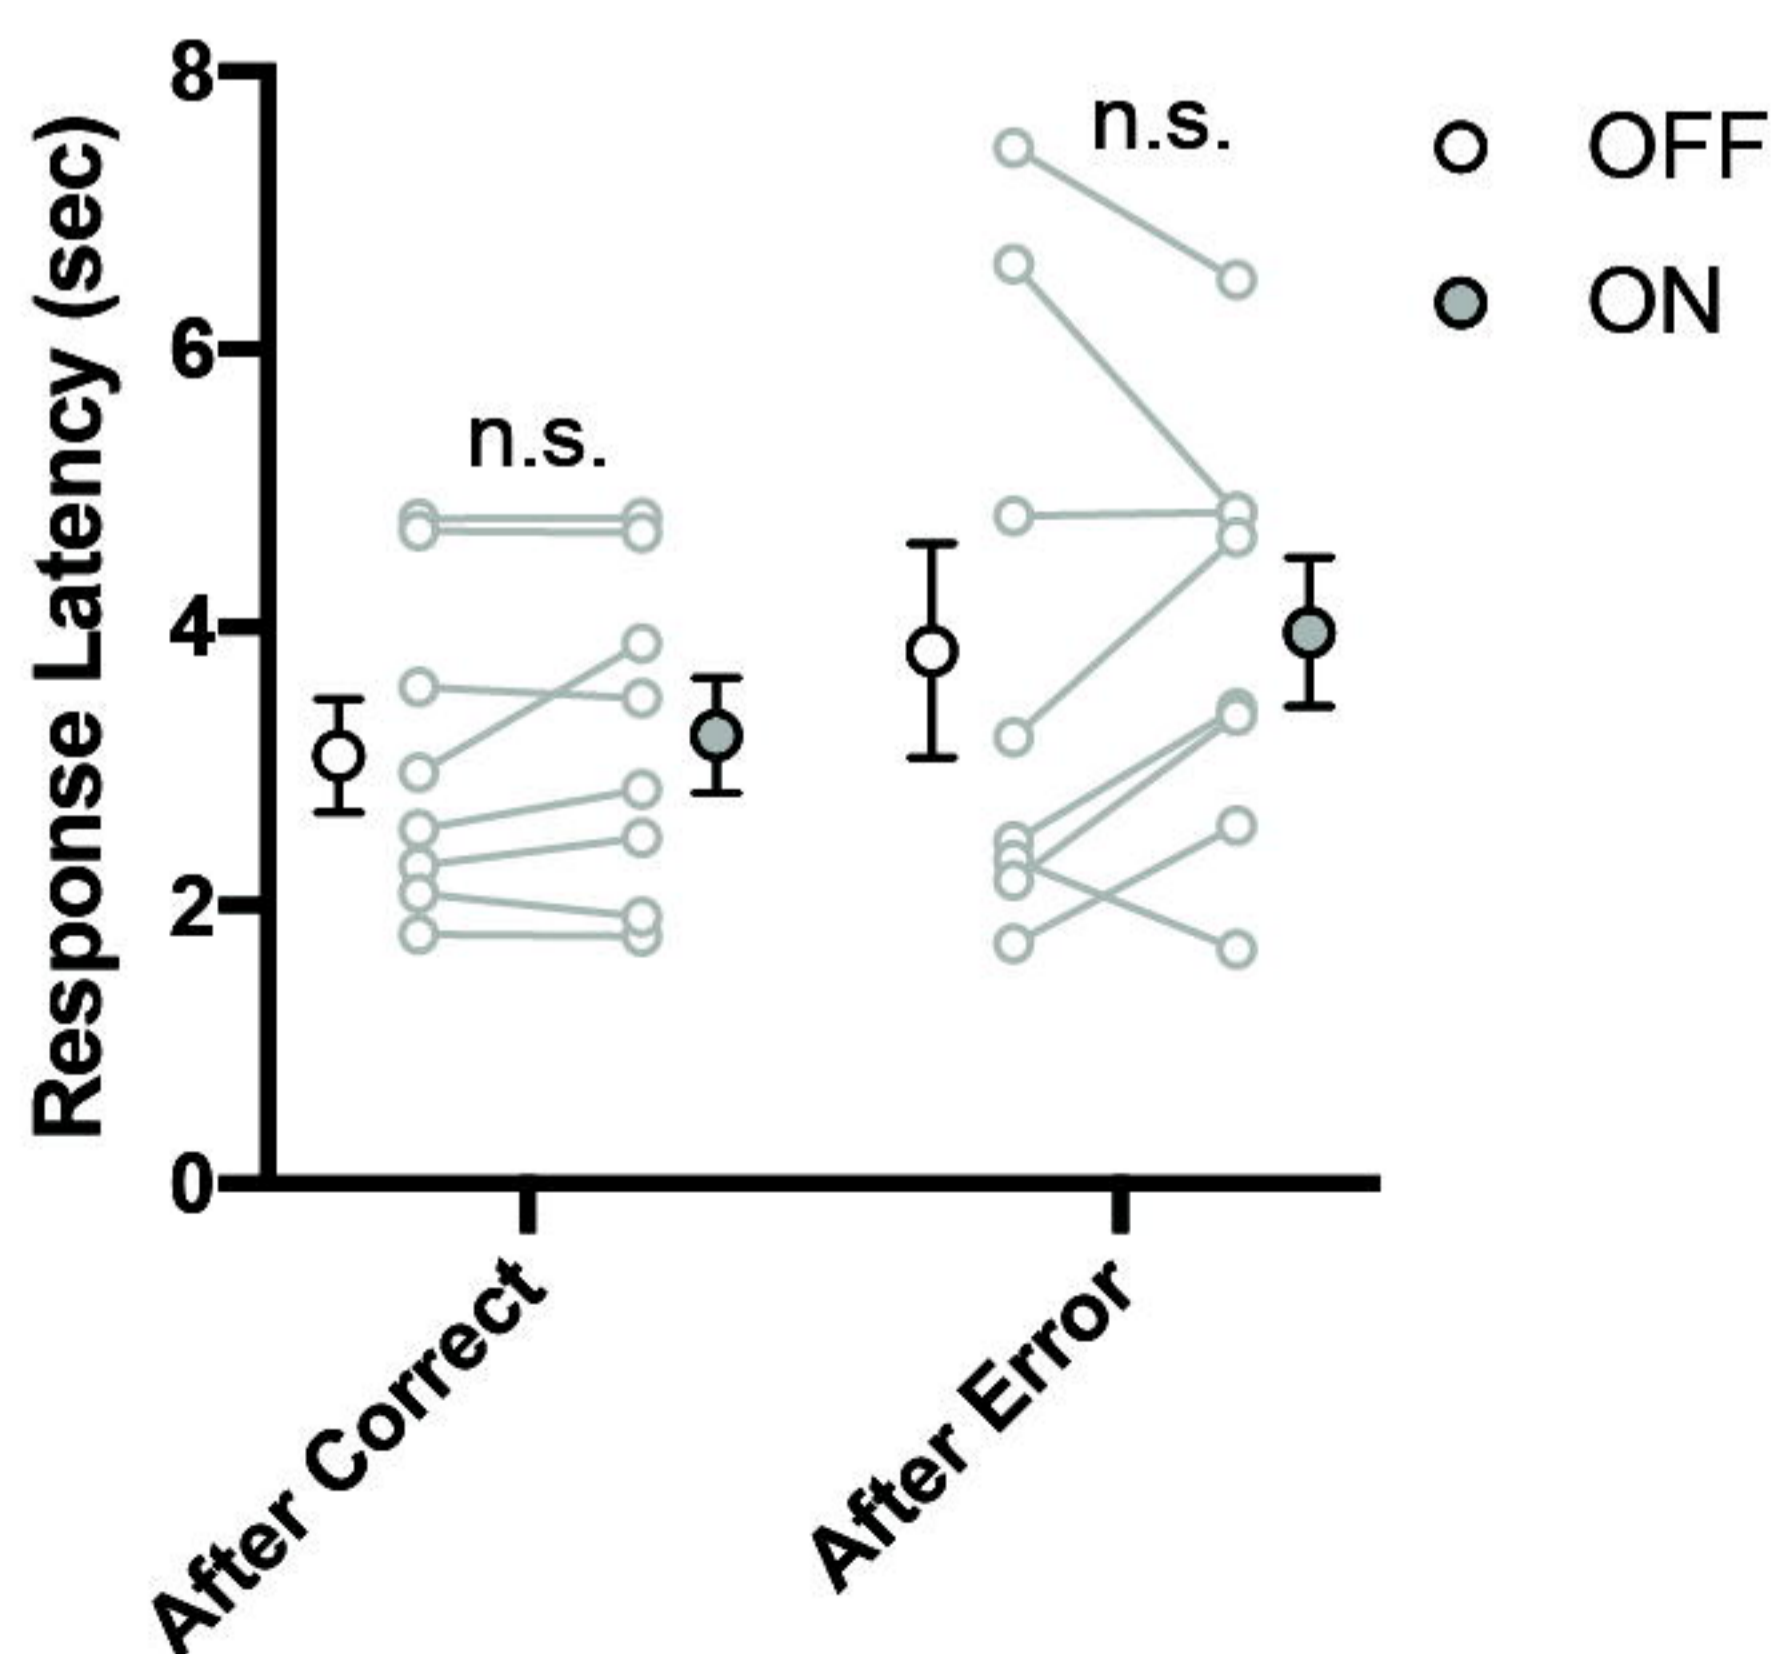

## F Outcome Inhibition (eYFP)

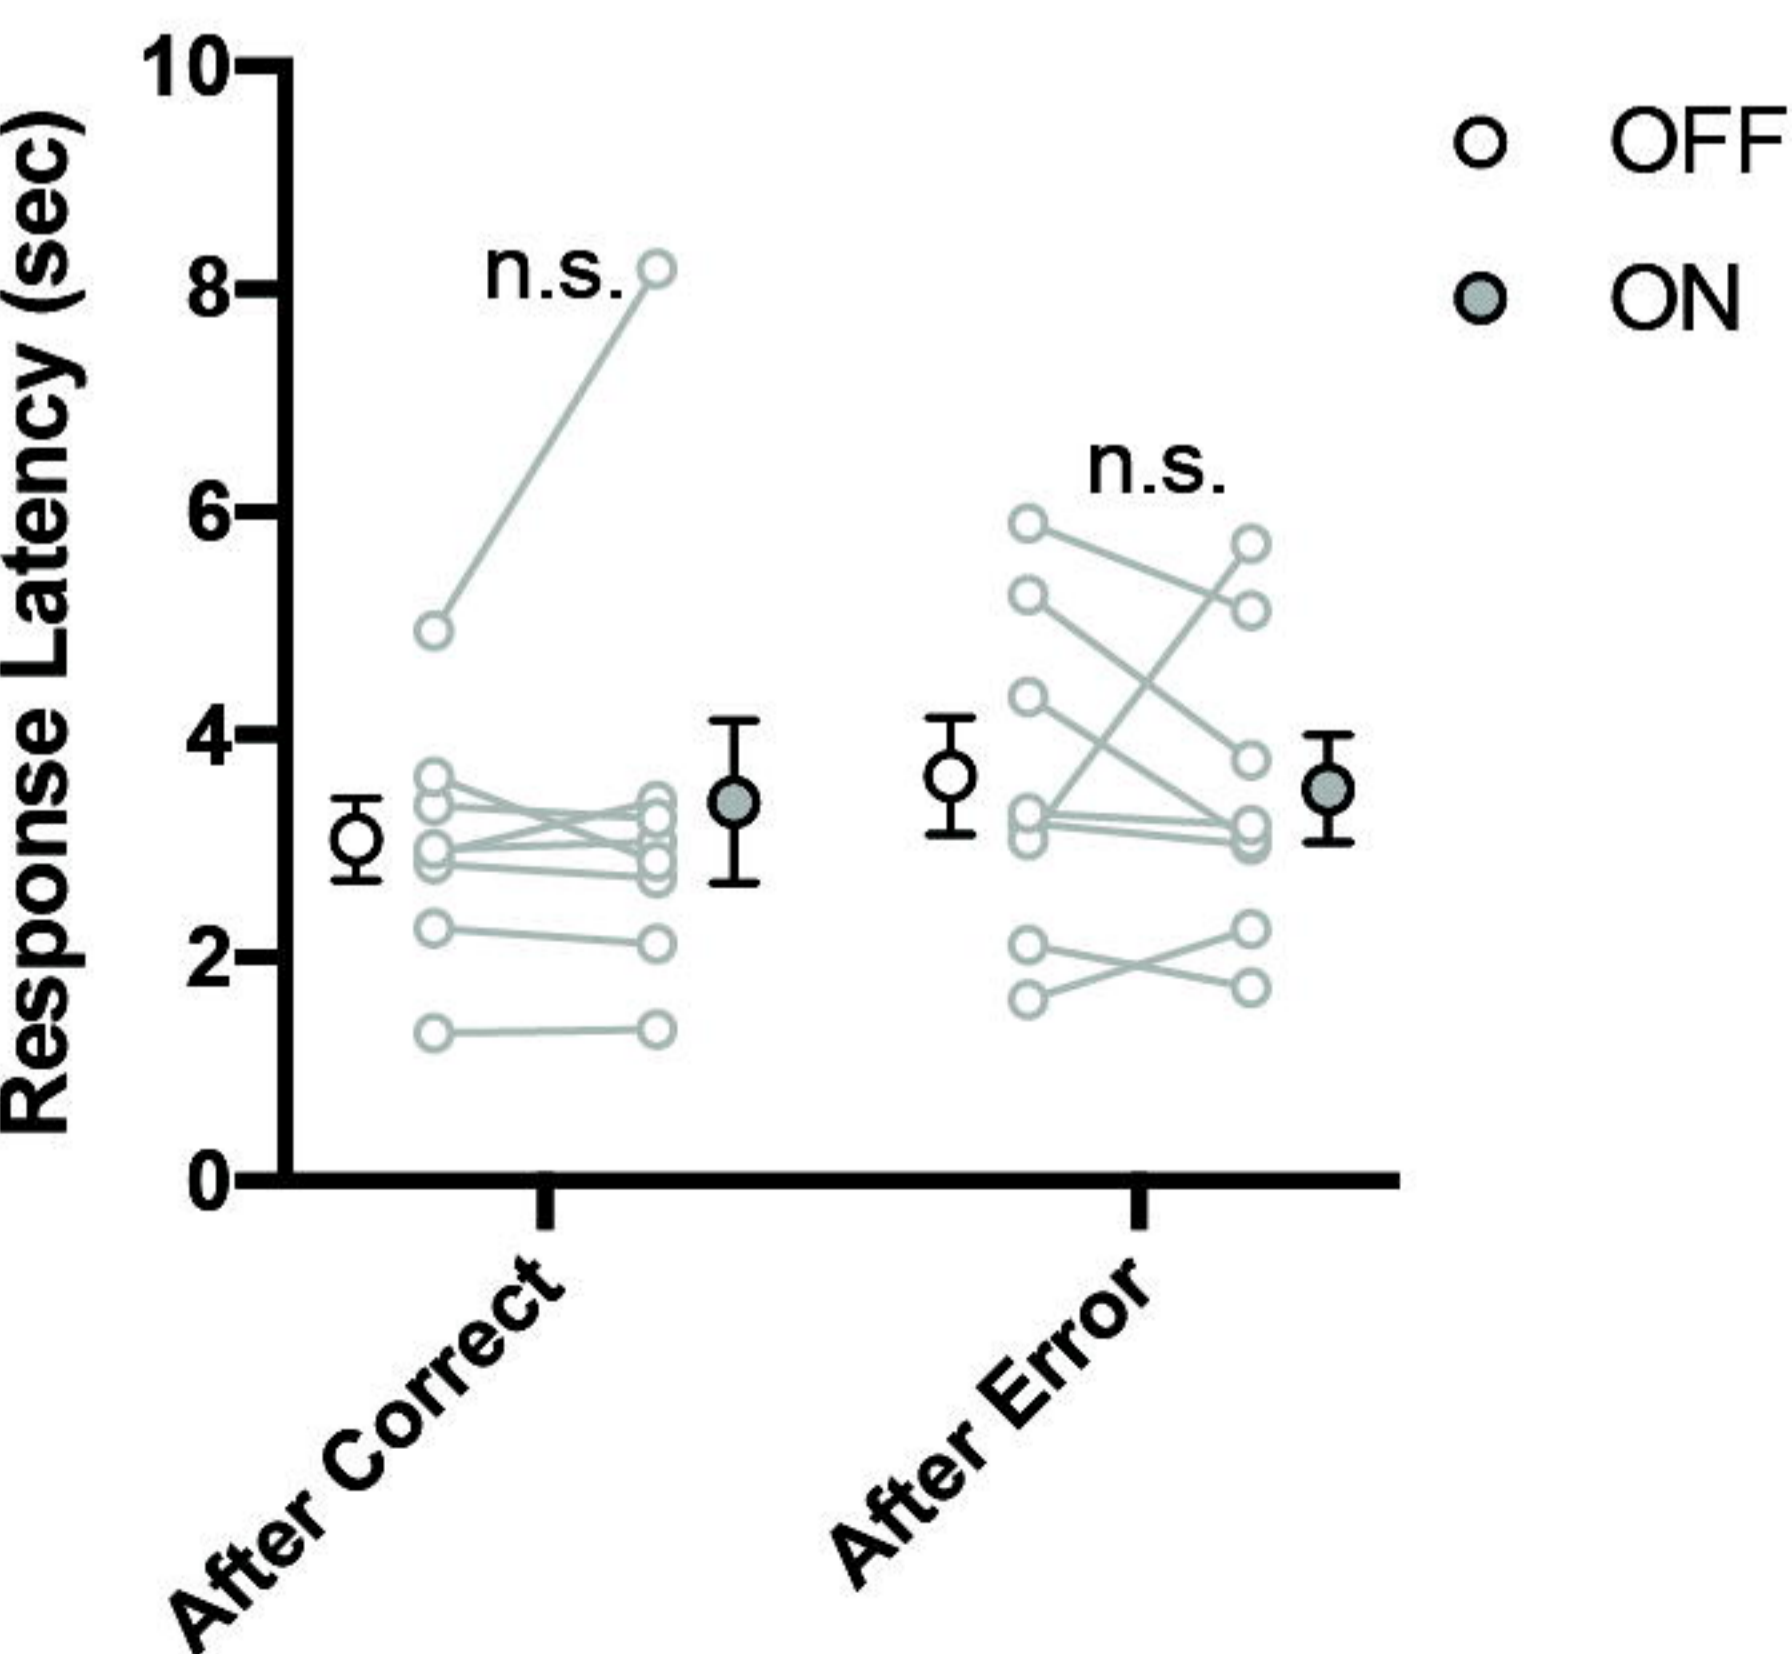

# Supplementary Figure S7 Nishioka et al.

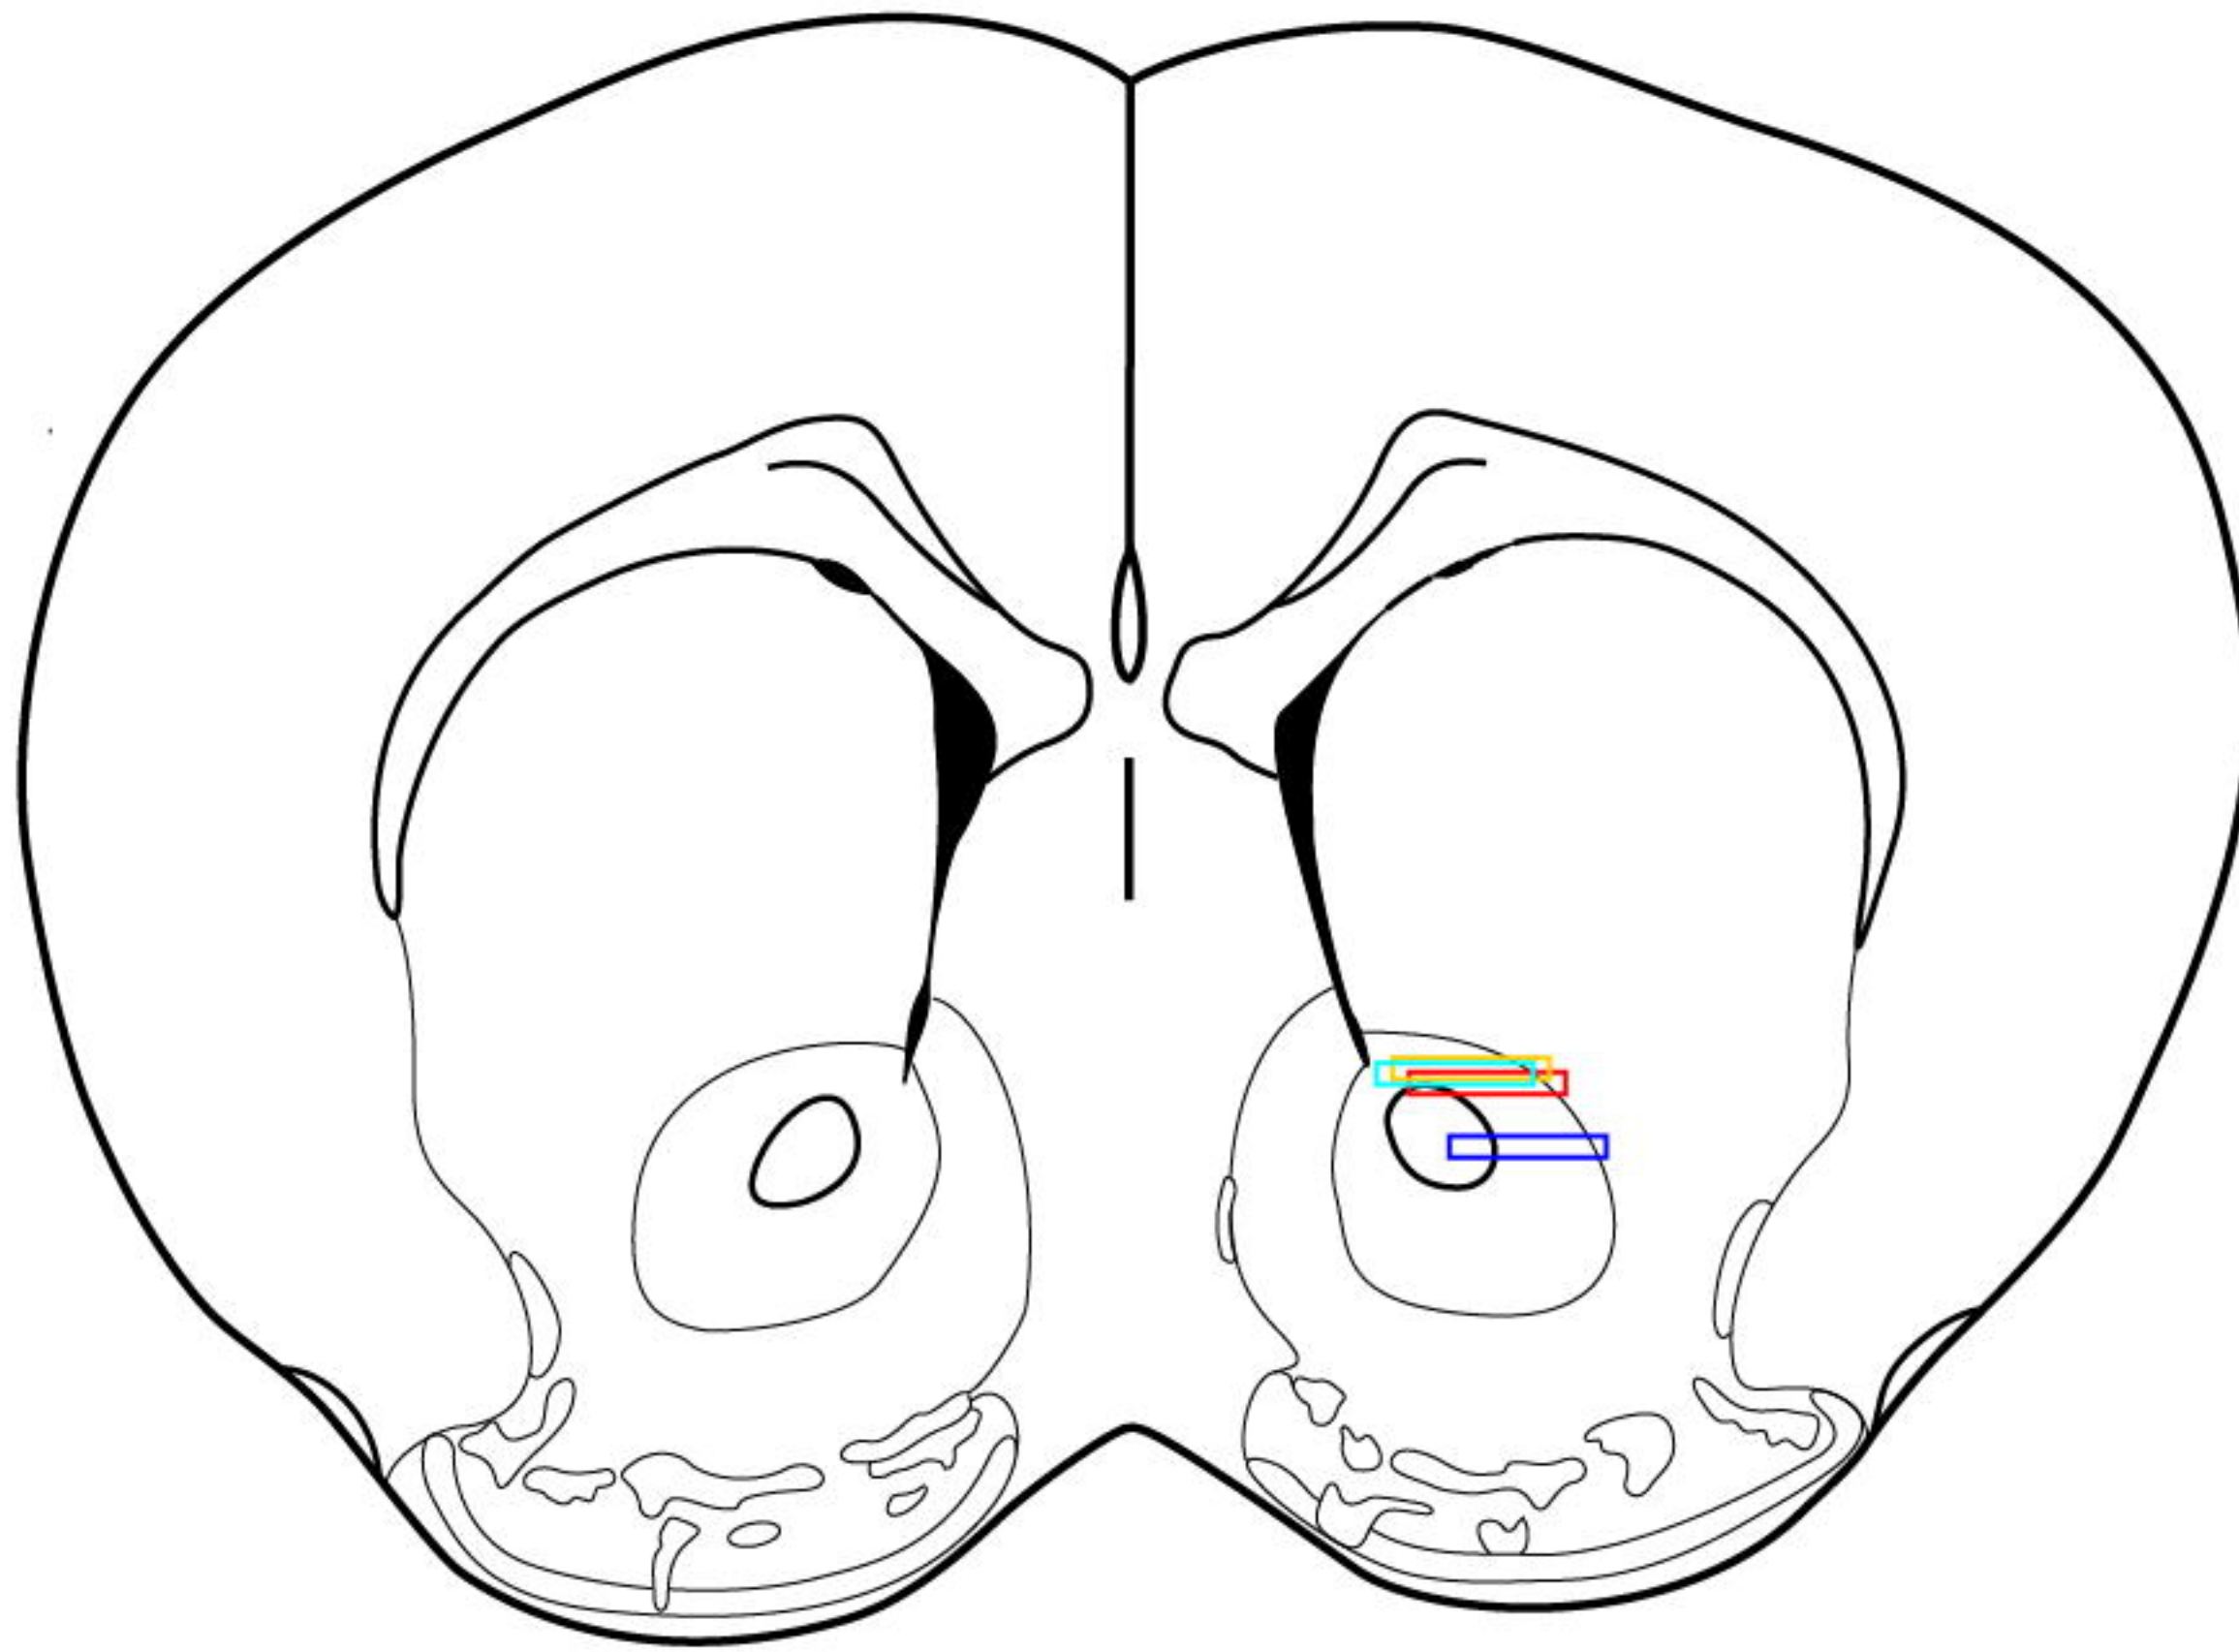

Bregma 1.18 mm

bioRxiv preprint doi: <https://doi.org/10.1101/2021.08.05.455353>; this version posted August 5, 2021. The copyright holder for this preprint (which was not certified by peer review) is the author/funder, who has granted bioRxiv a license to display the preprint in perpetuity. It is made available under aCC-BY-NC-ND 4.0 International license.

- img #1
  - img #2
  - img #3
  - img #4
  - img #5
  - img #6
- D1-Cre
- D2-Cre

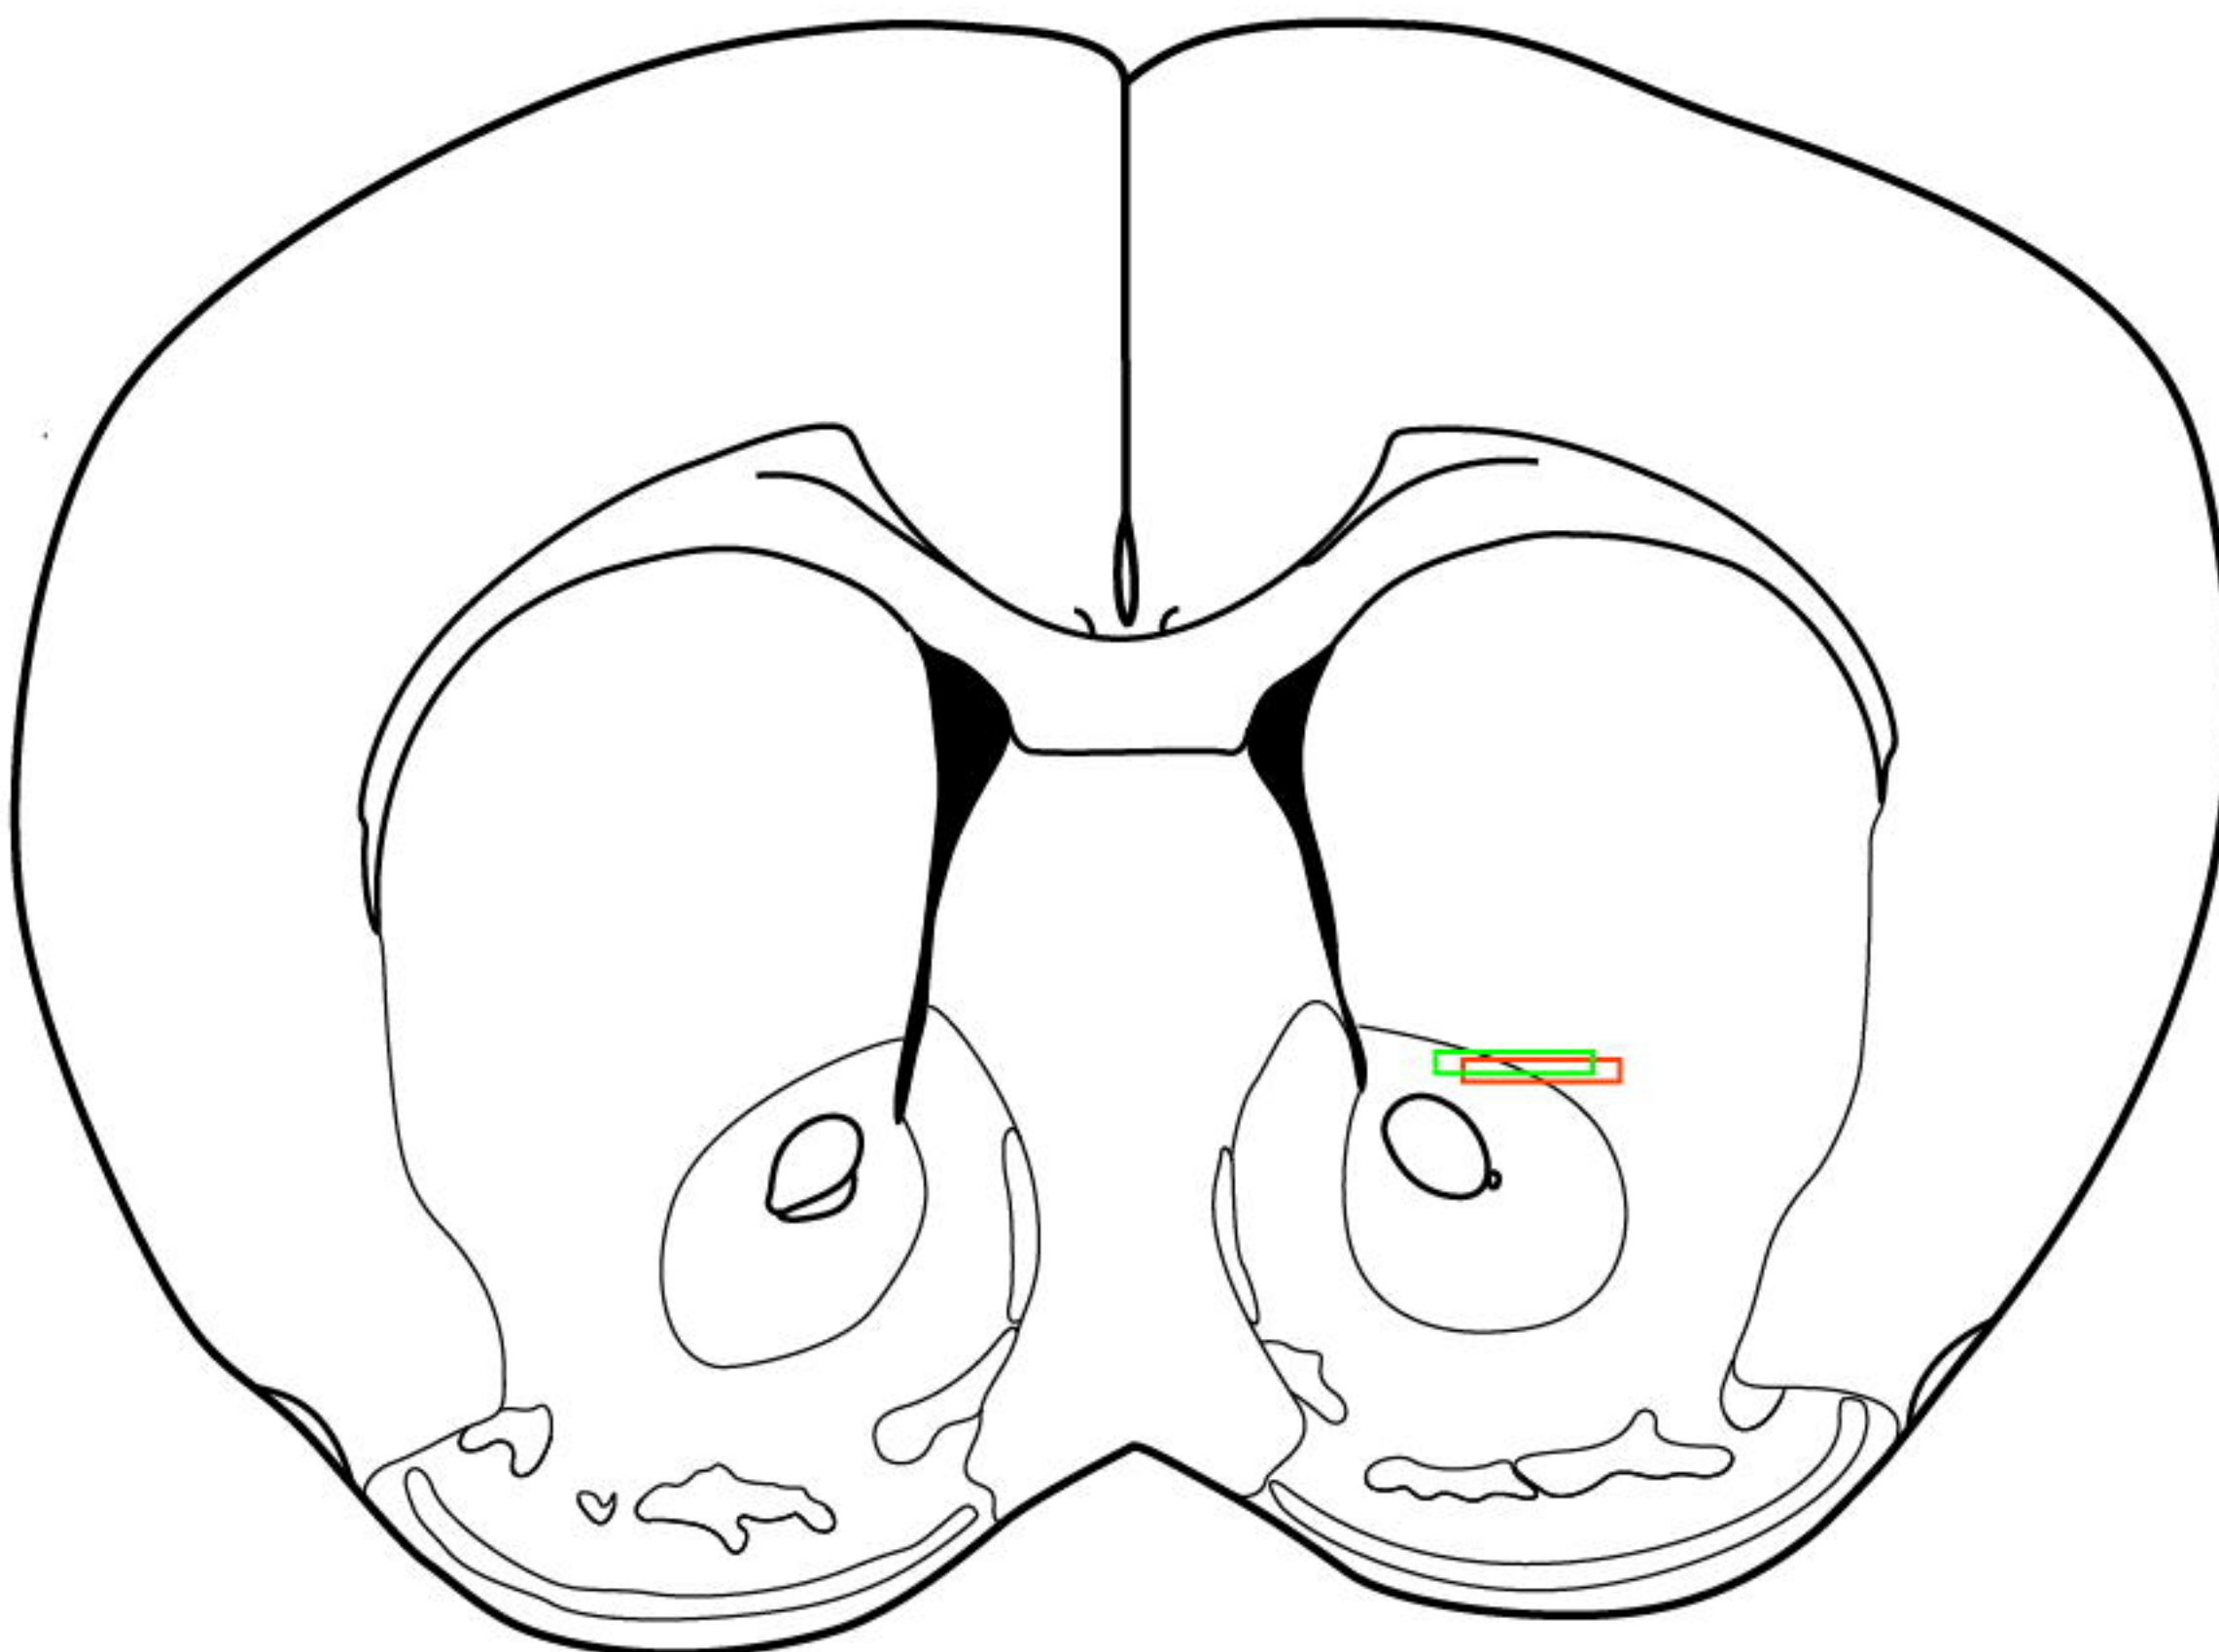

Bregma 1.10 mm

# Supplementary Figure S8 Nishioka et al.

D1-MSN

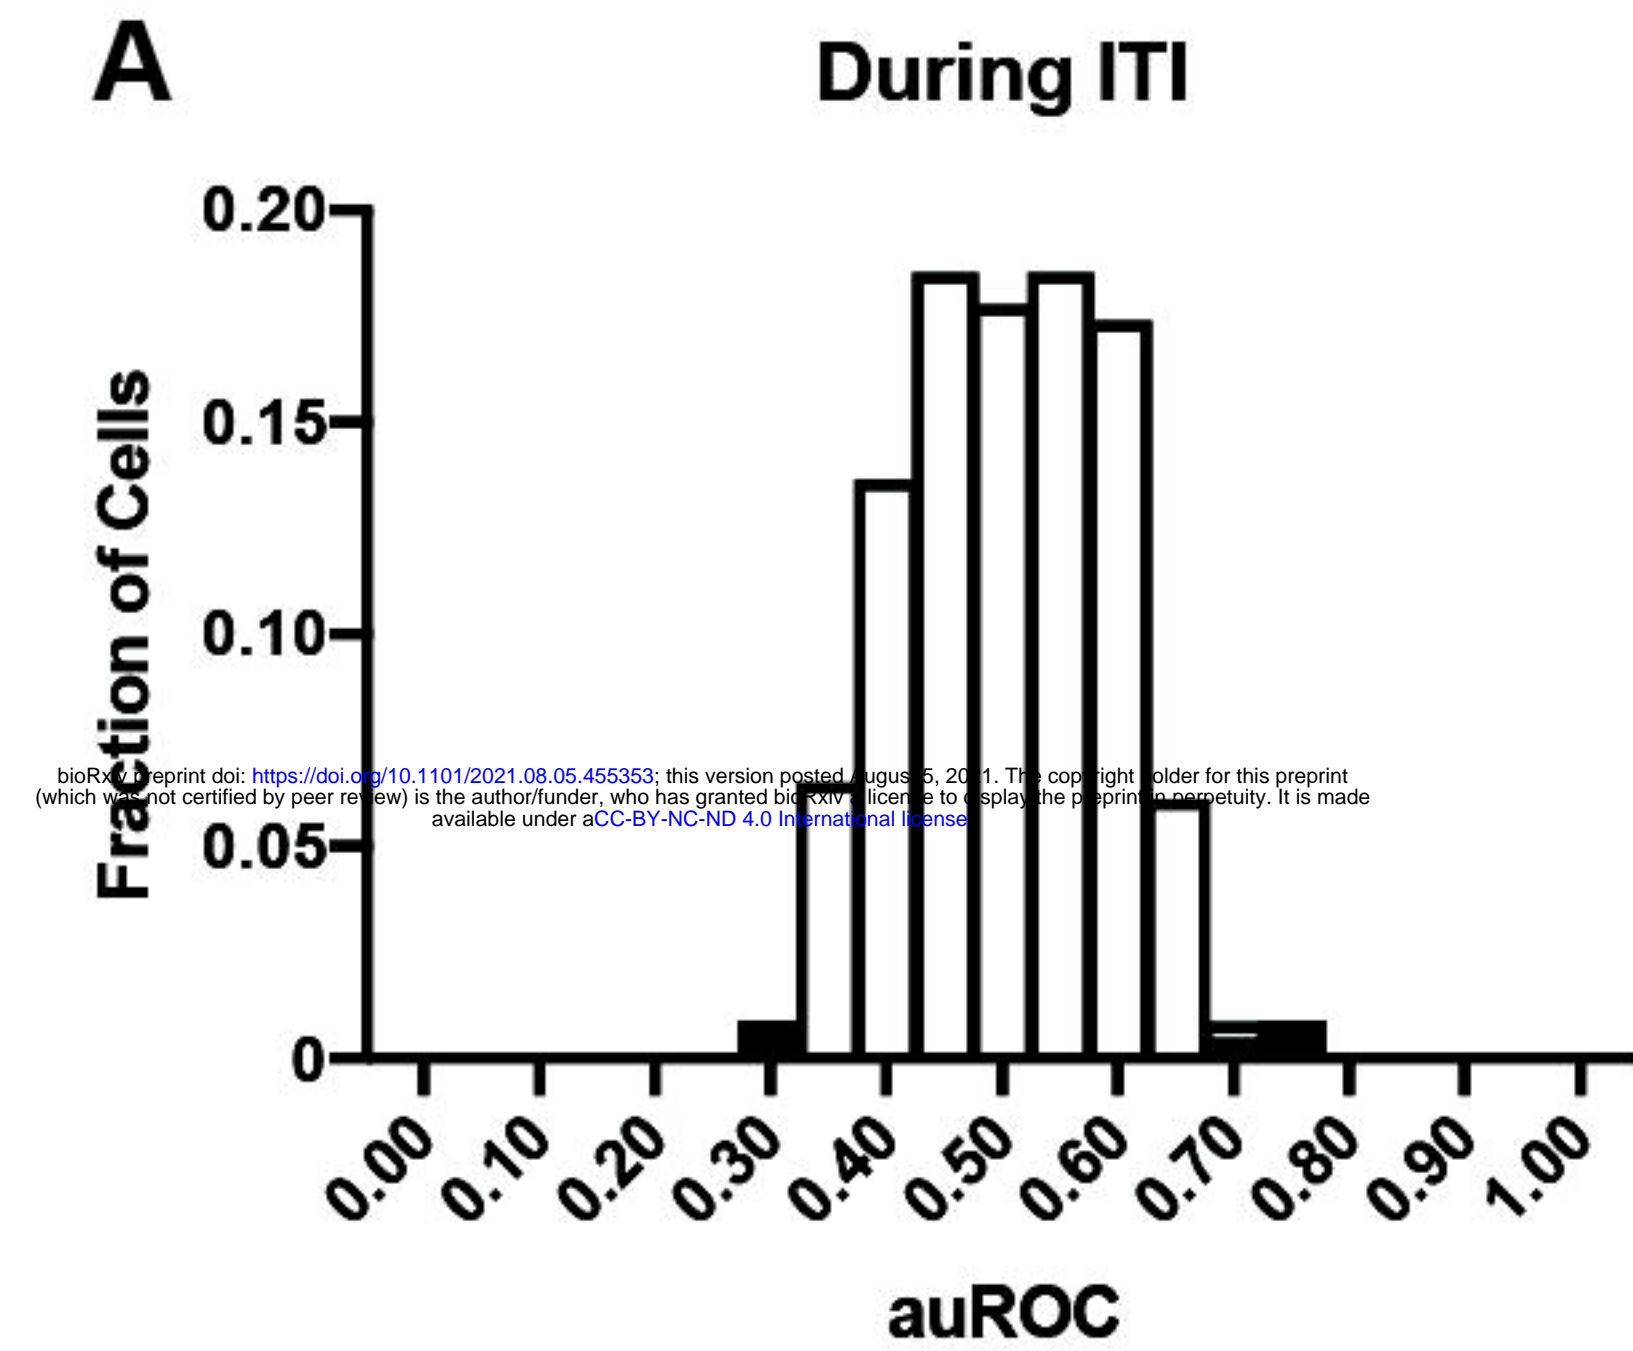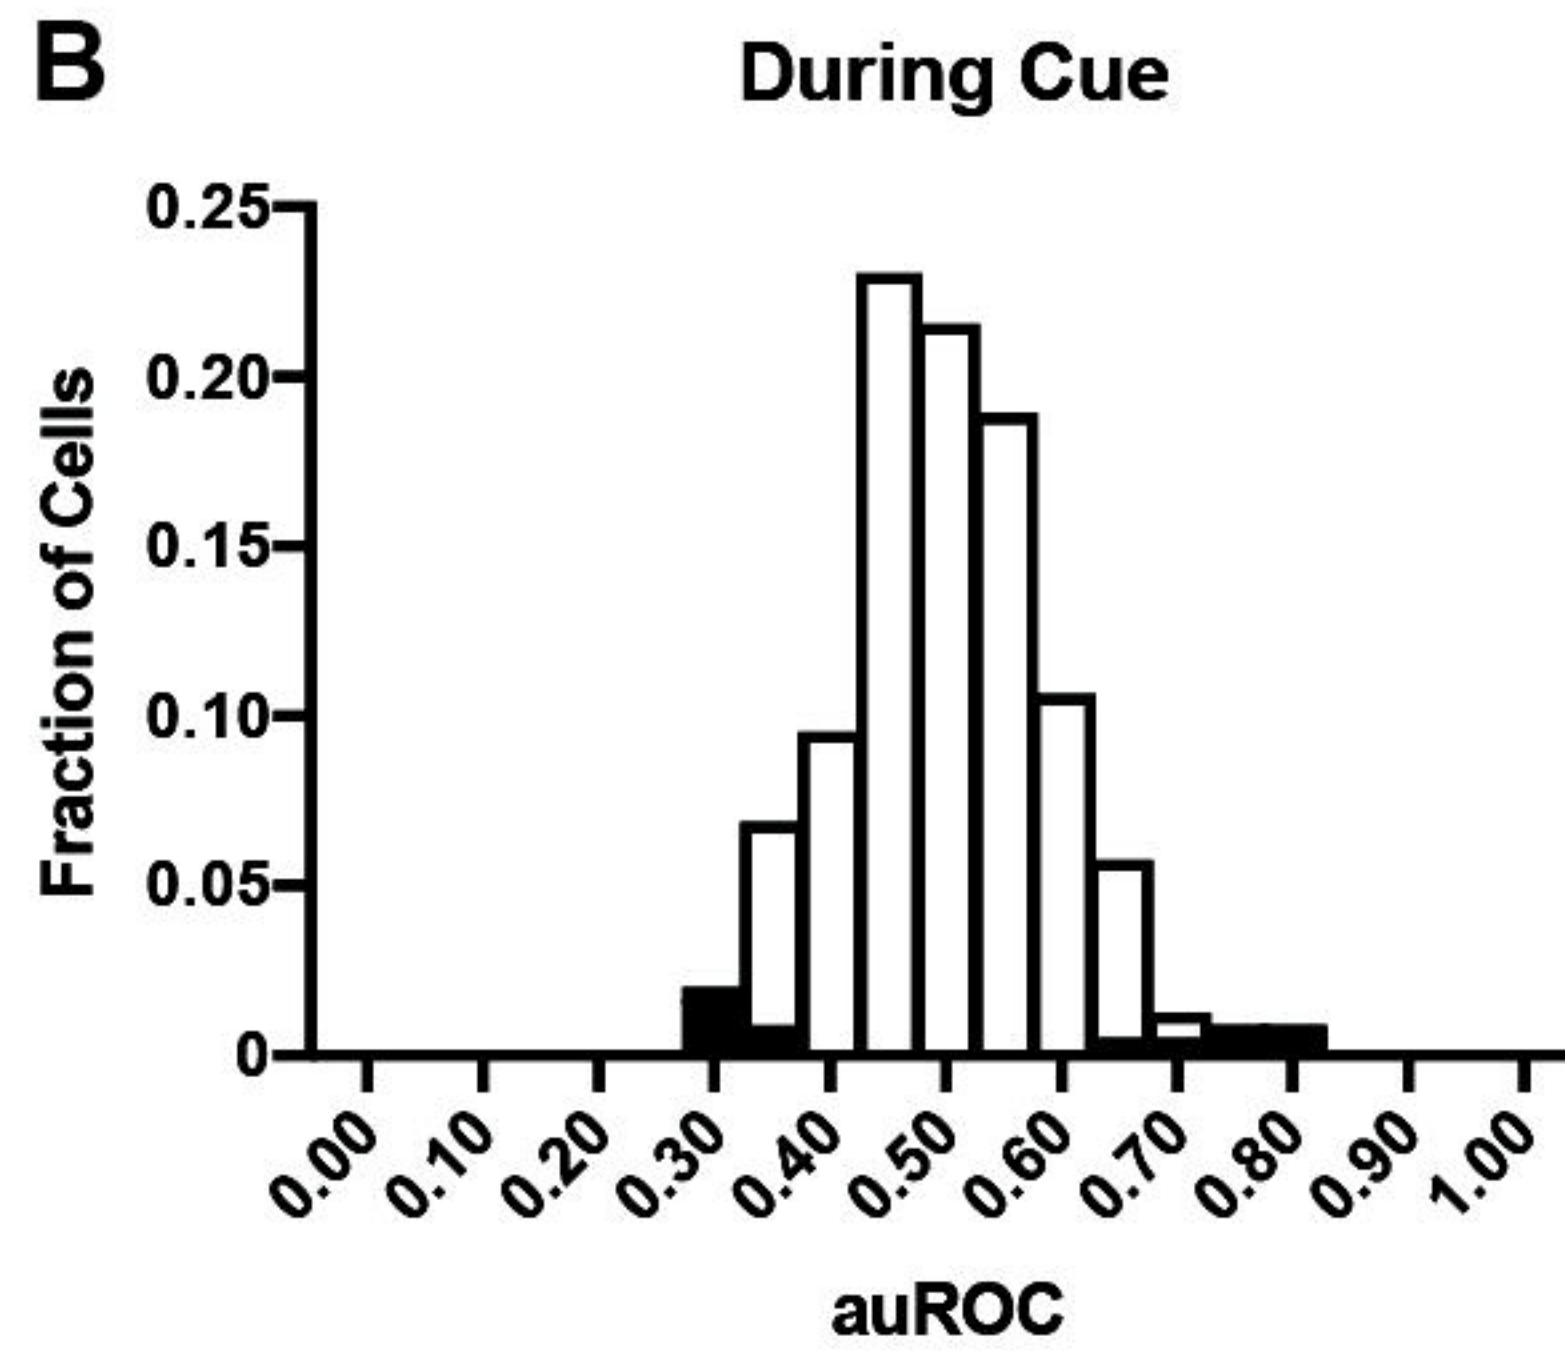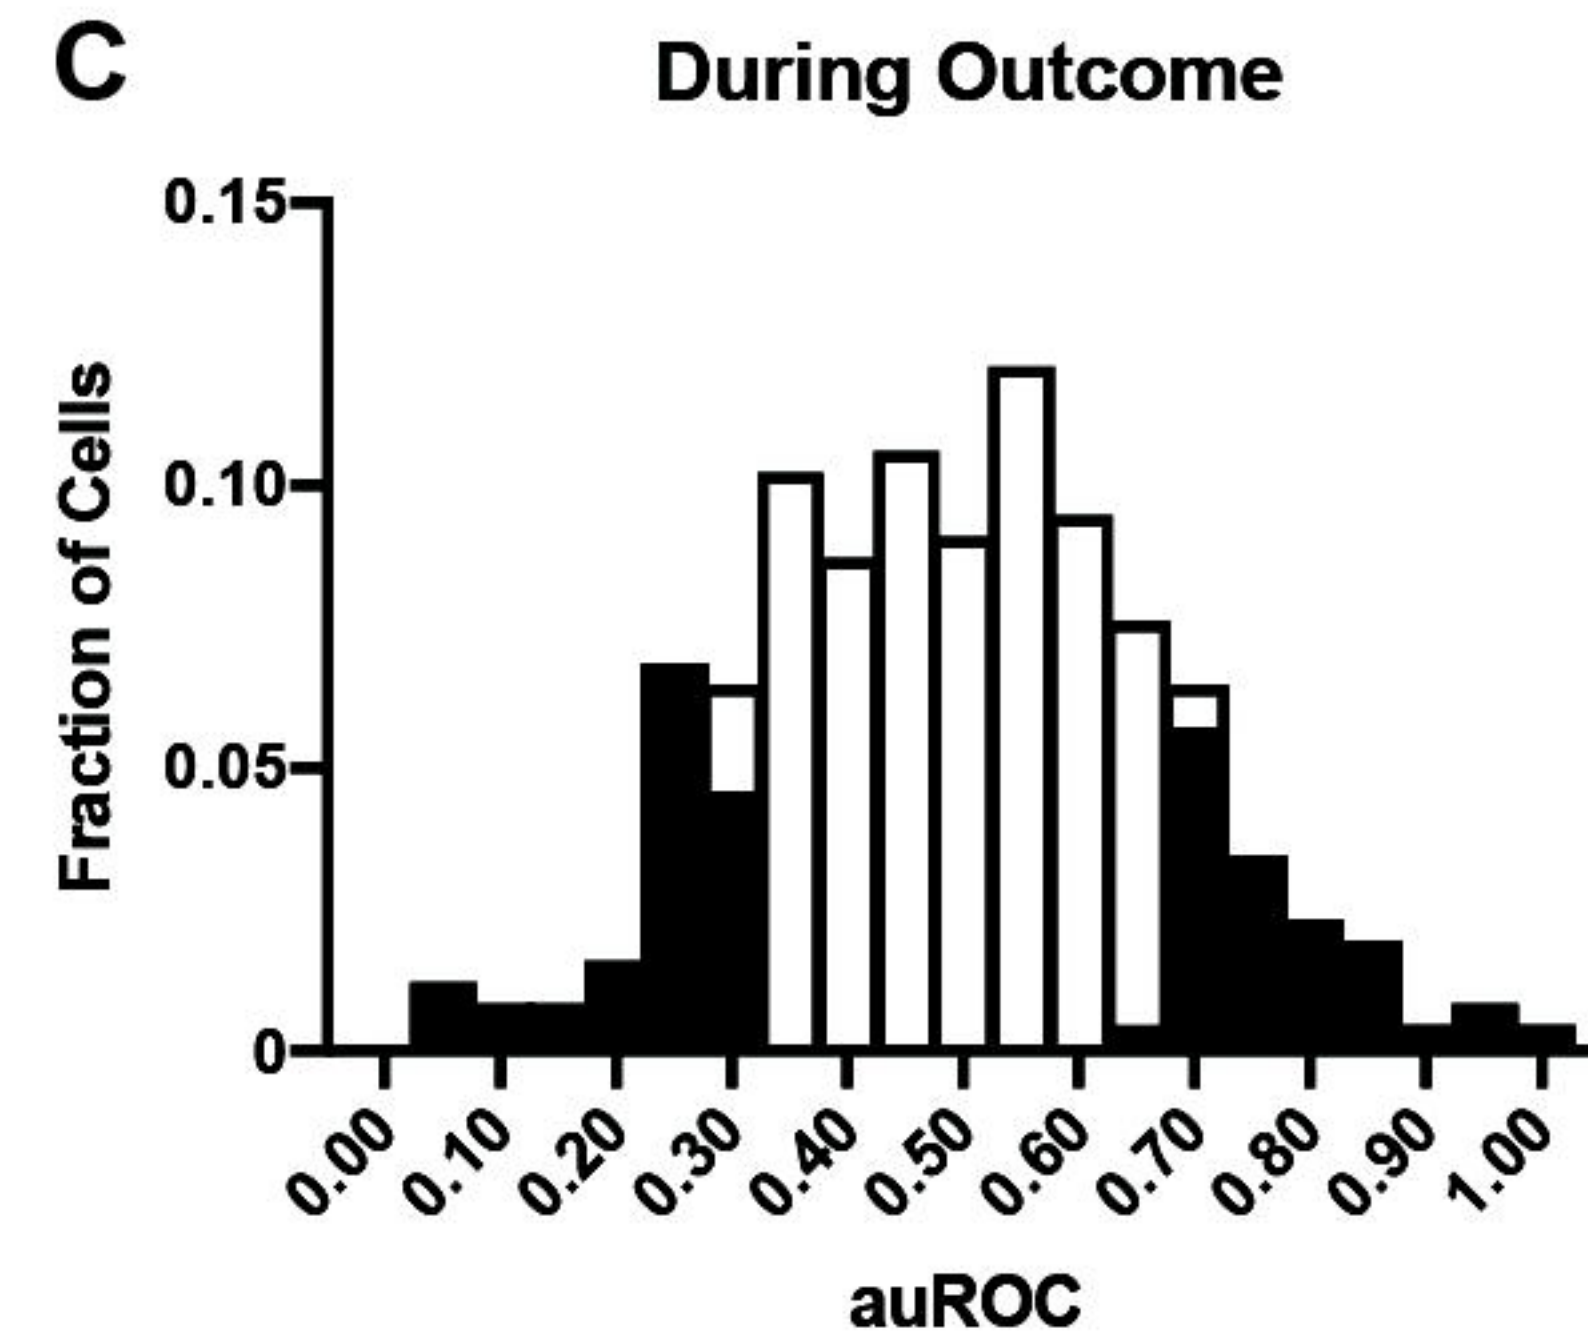

D2-MSN

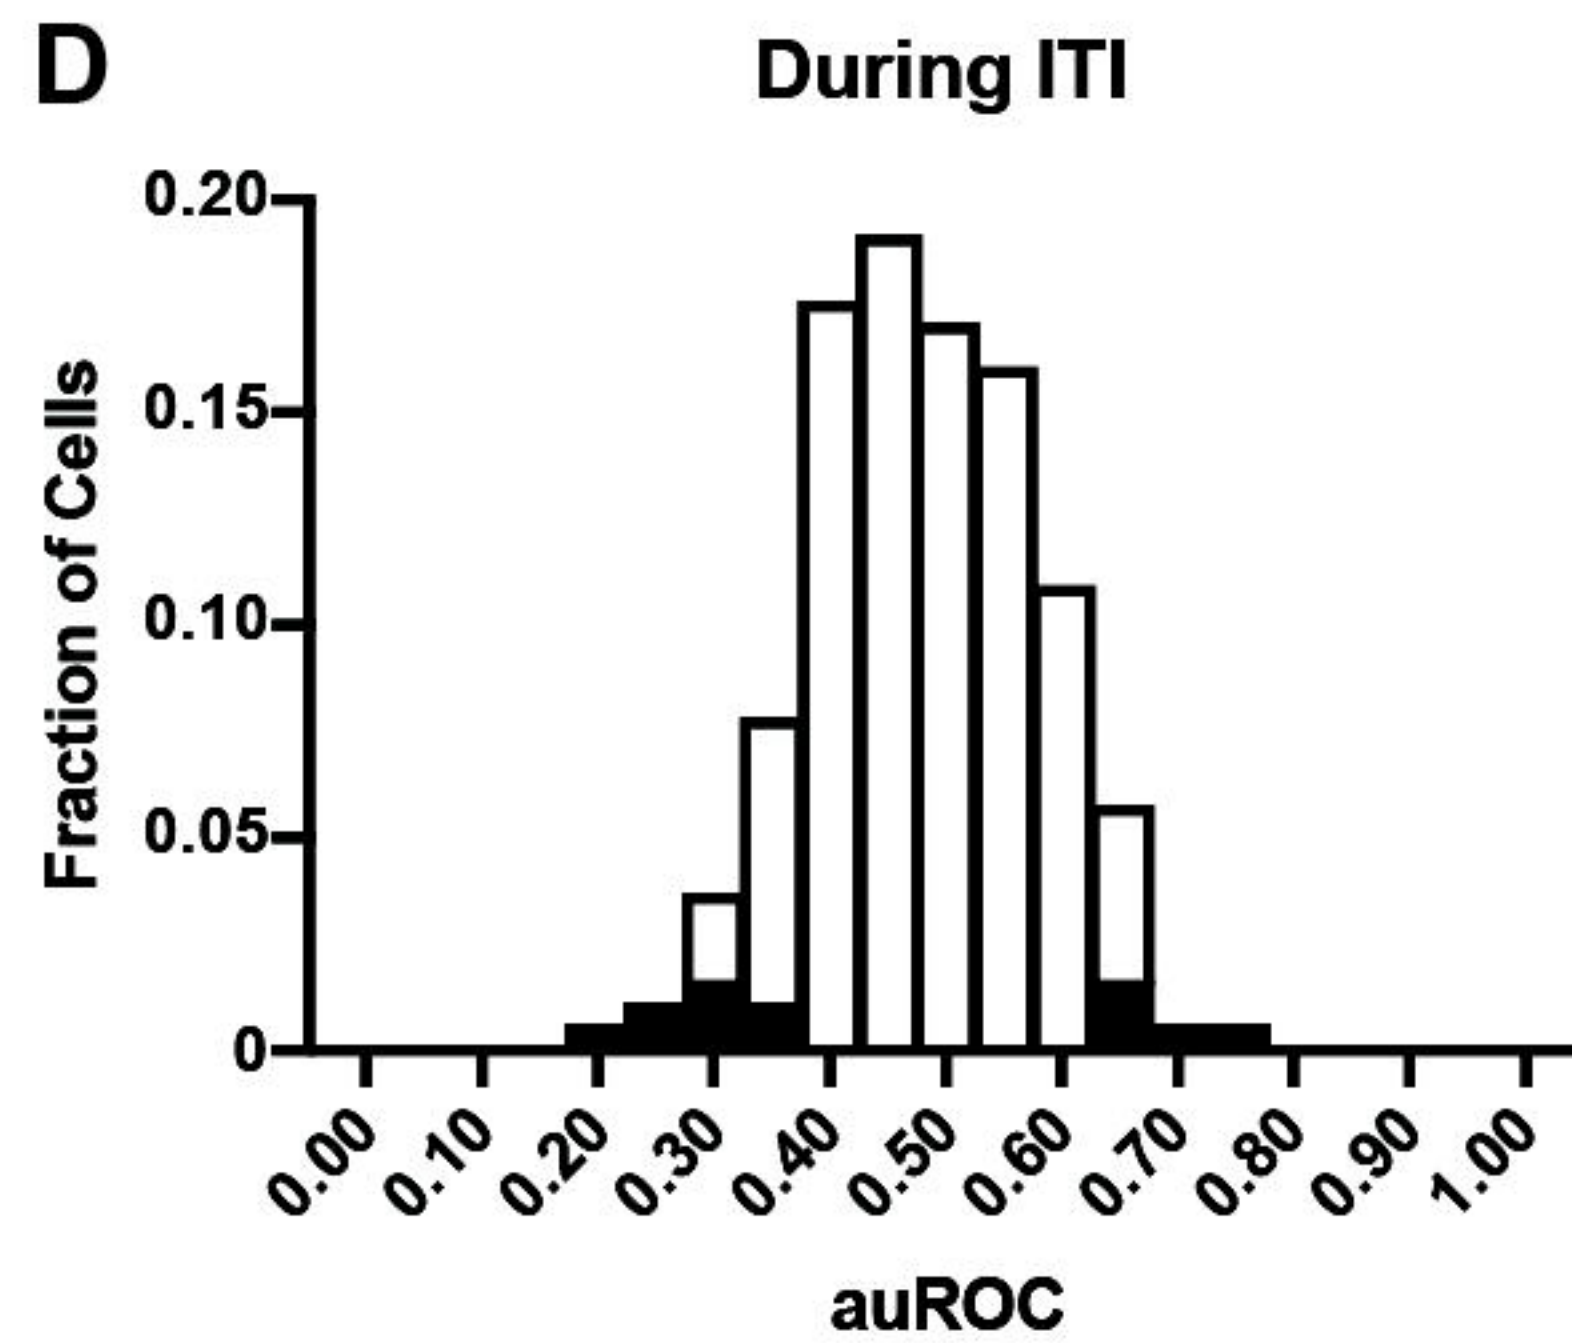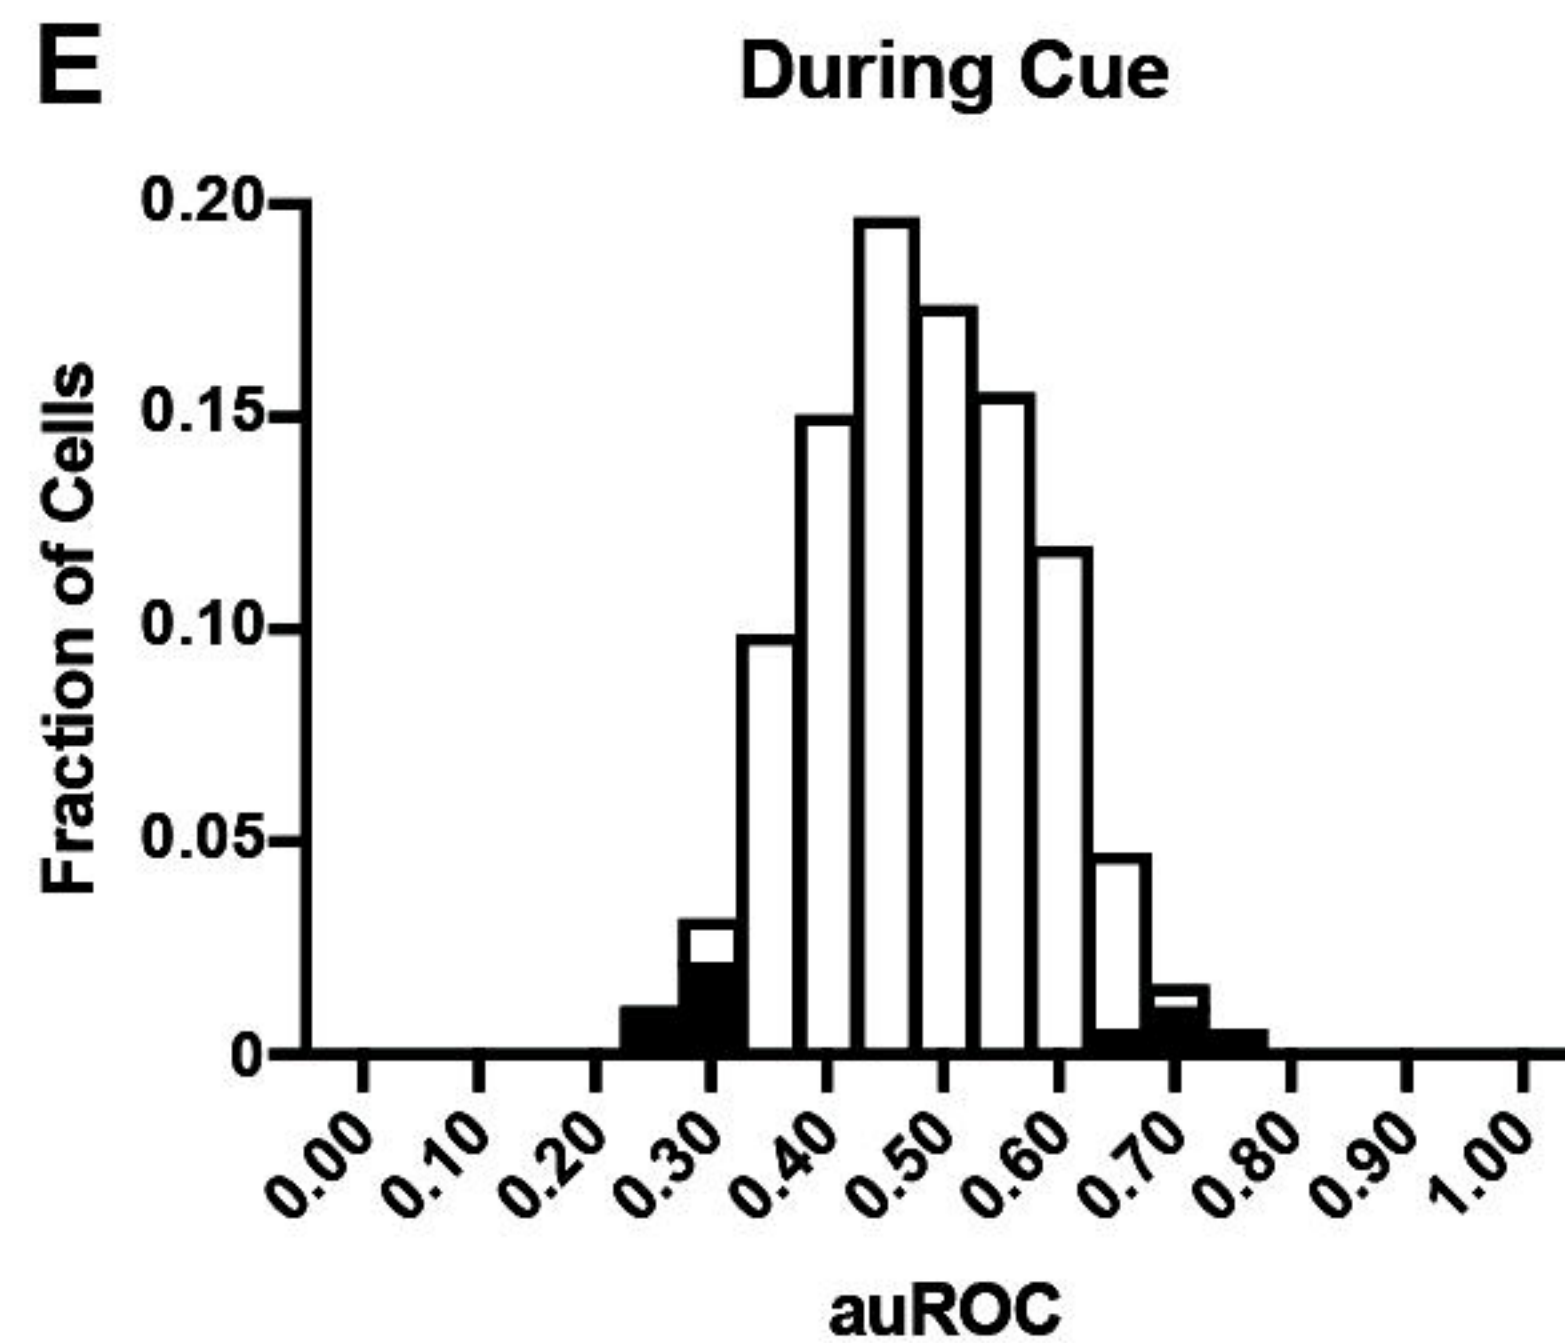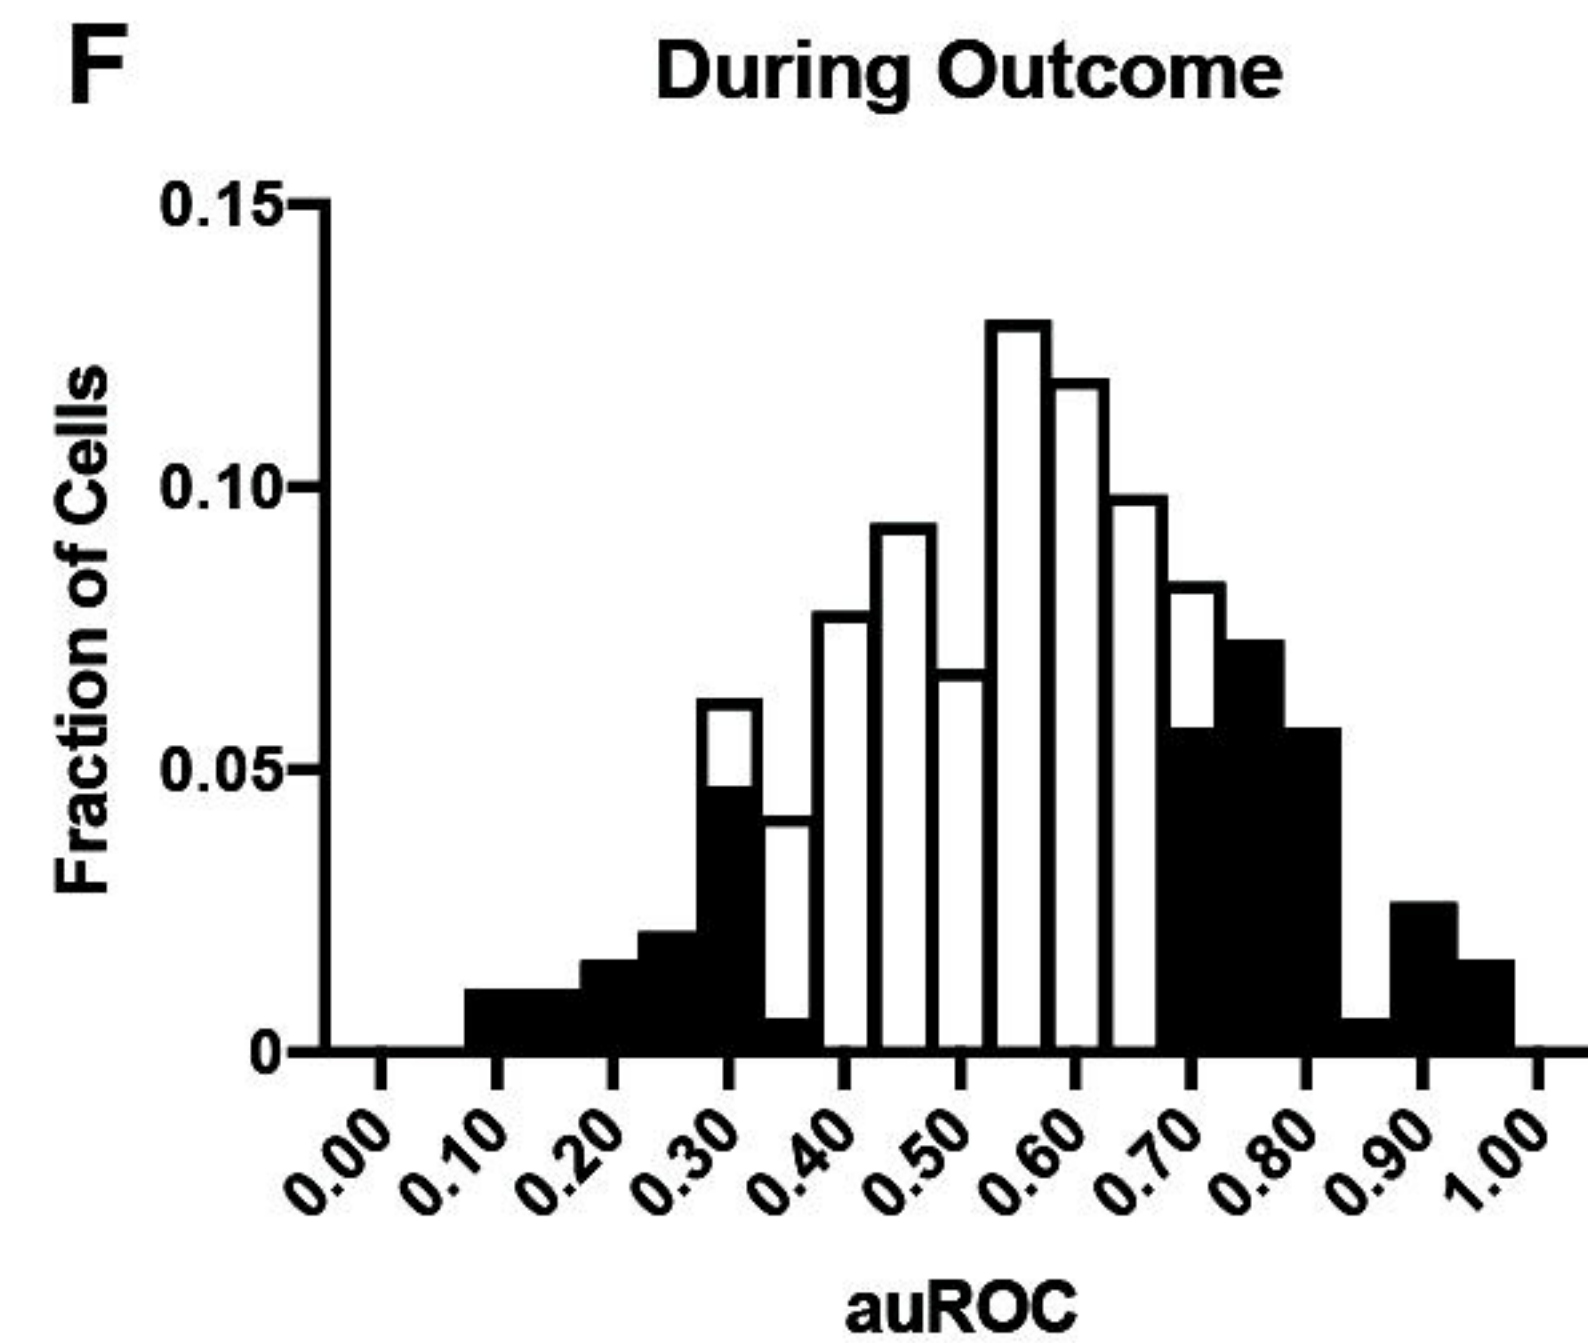

# Supplementary Figure S9 Nishioka et al.

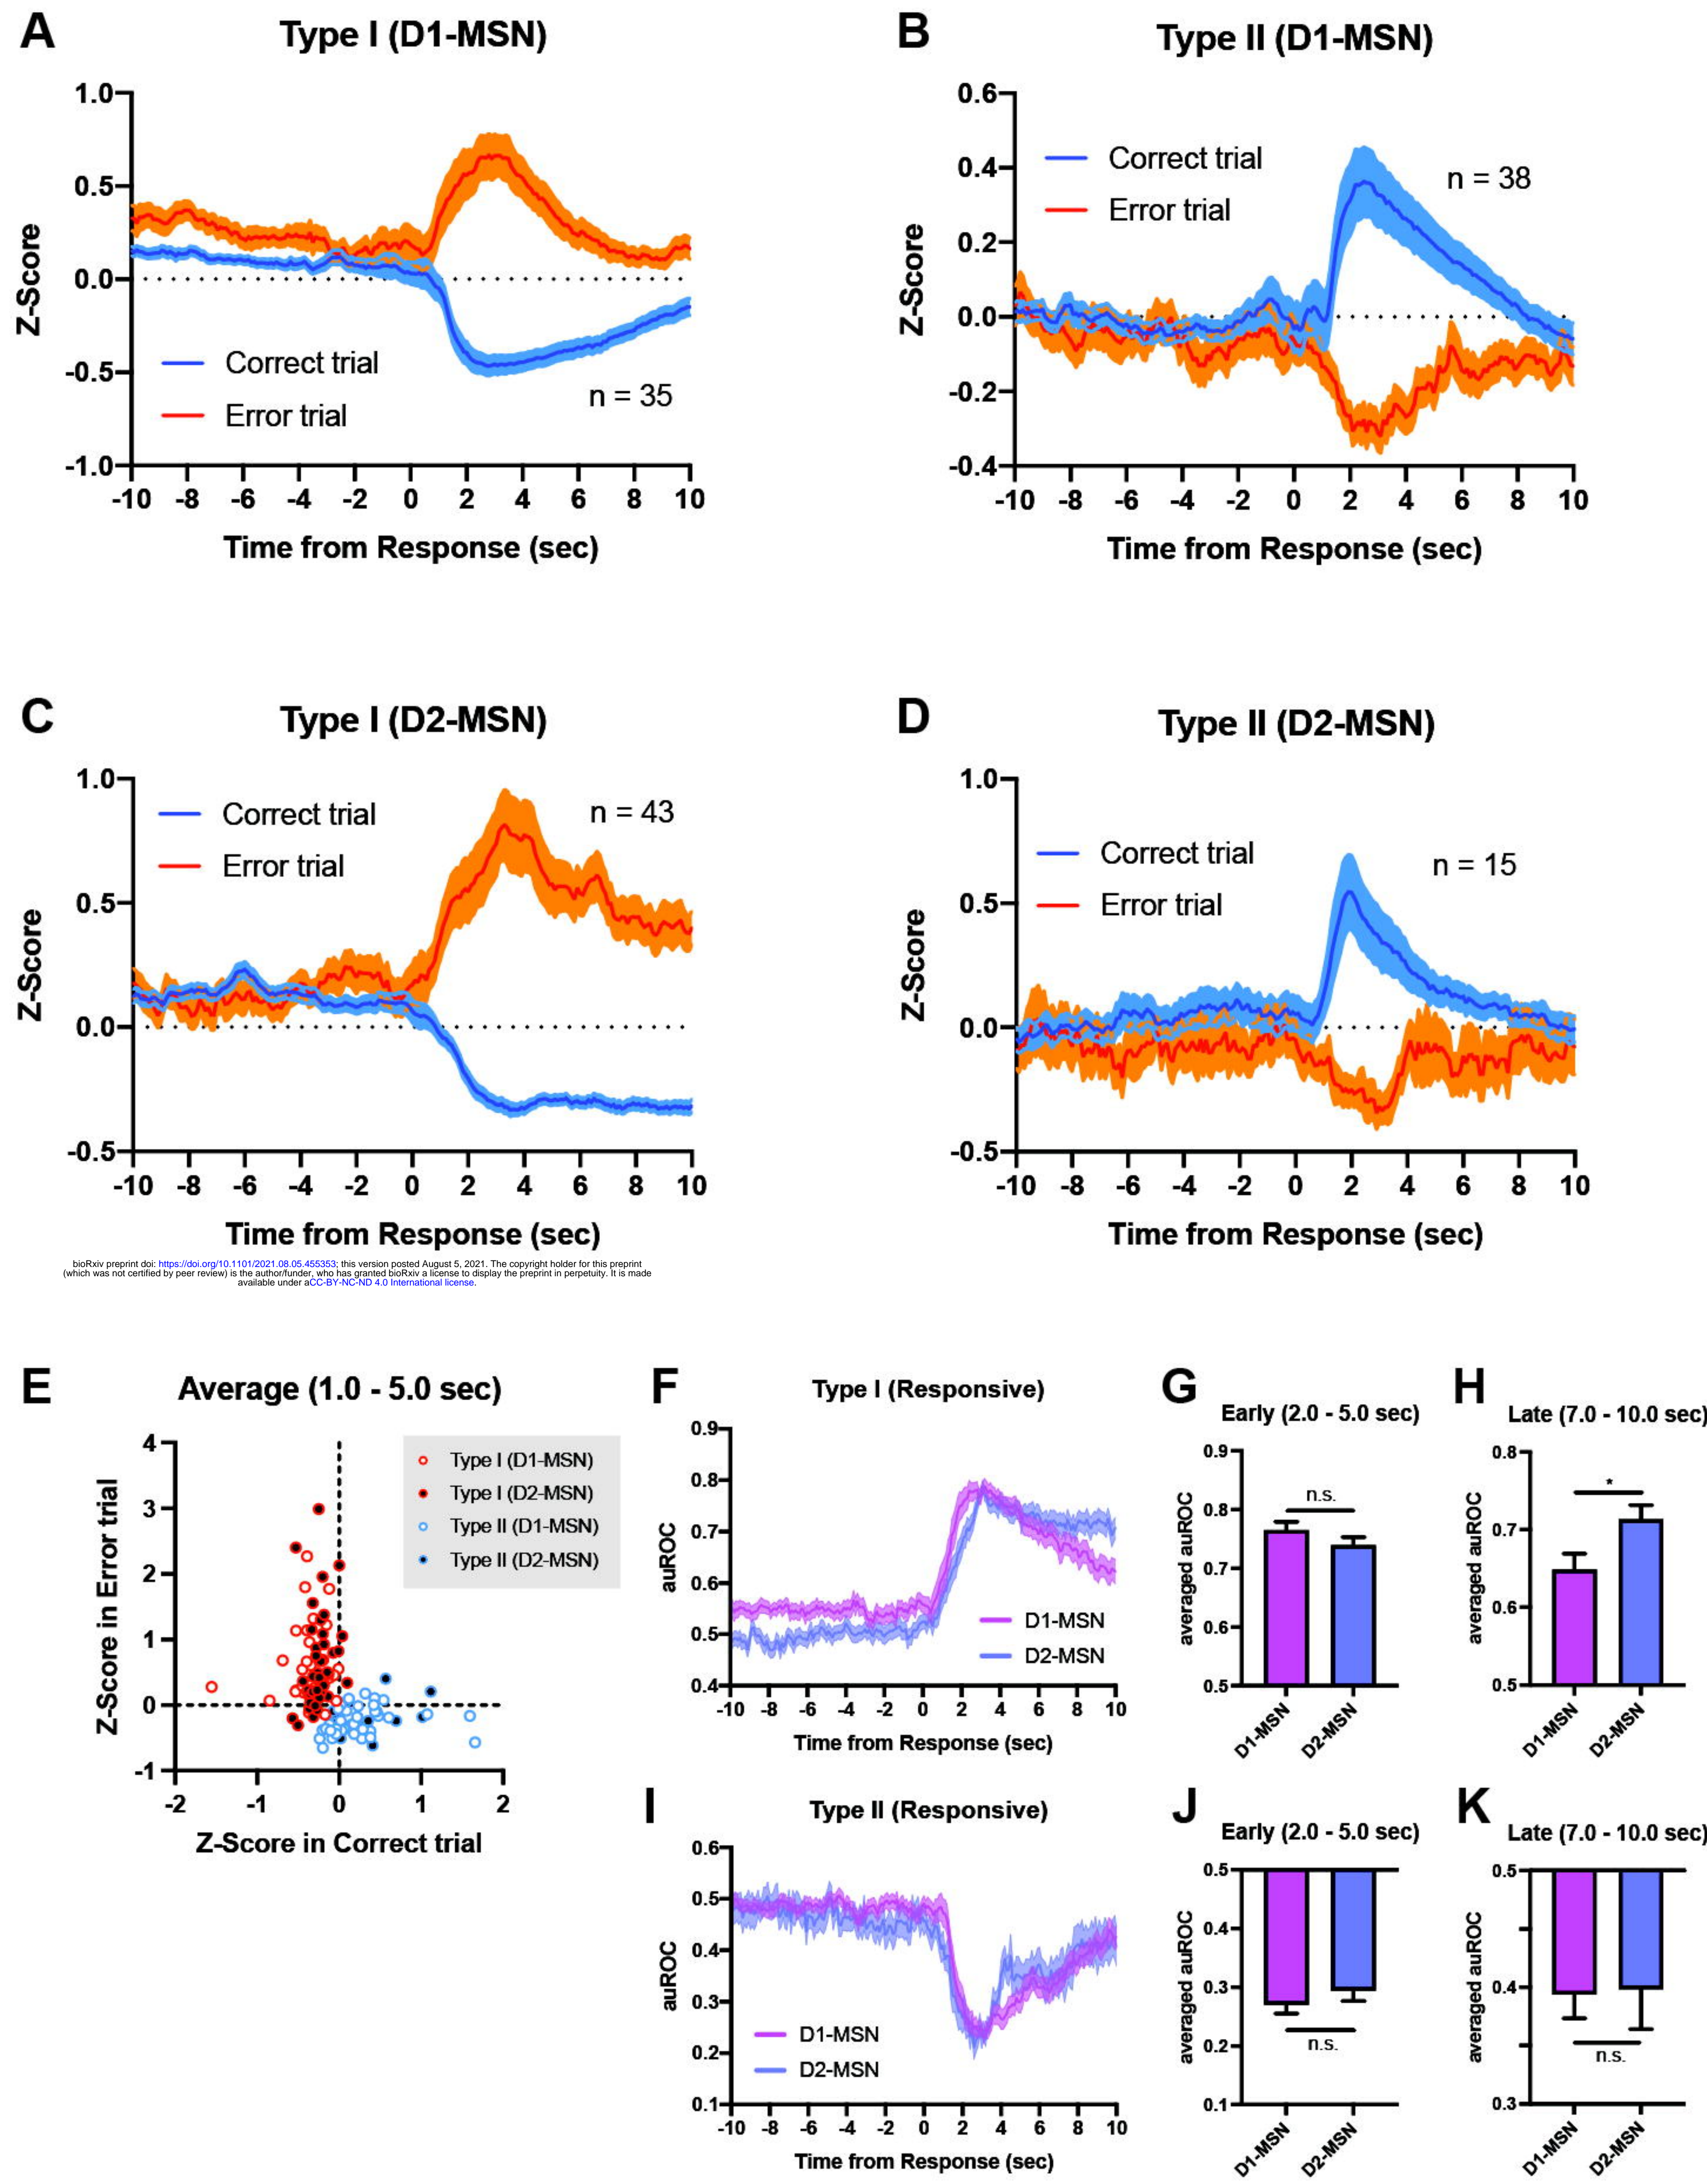



# Supplementary Figure S10 Nishioka et al.

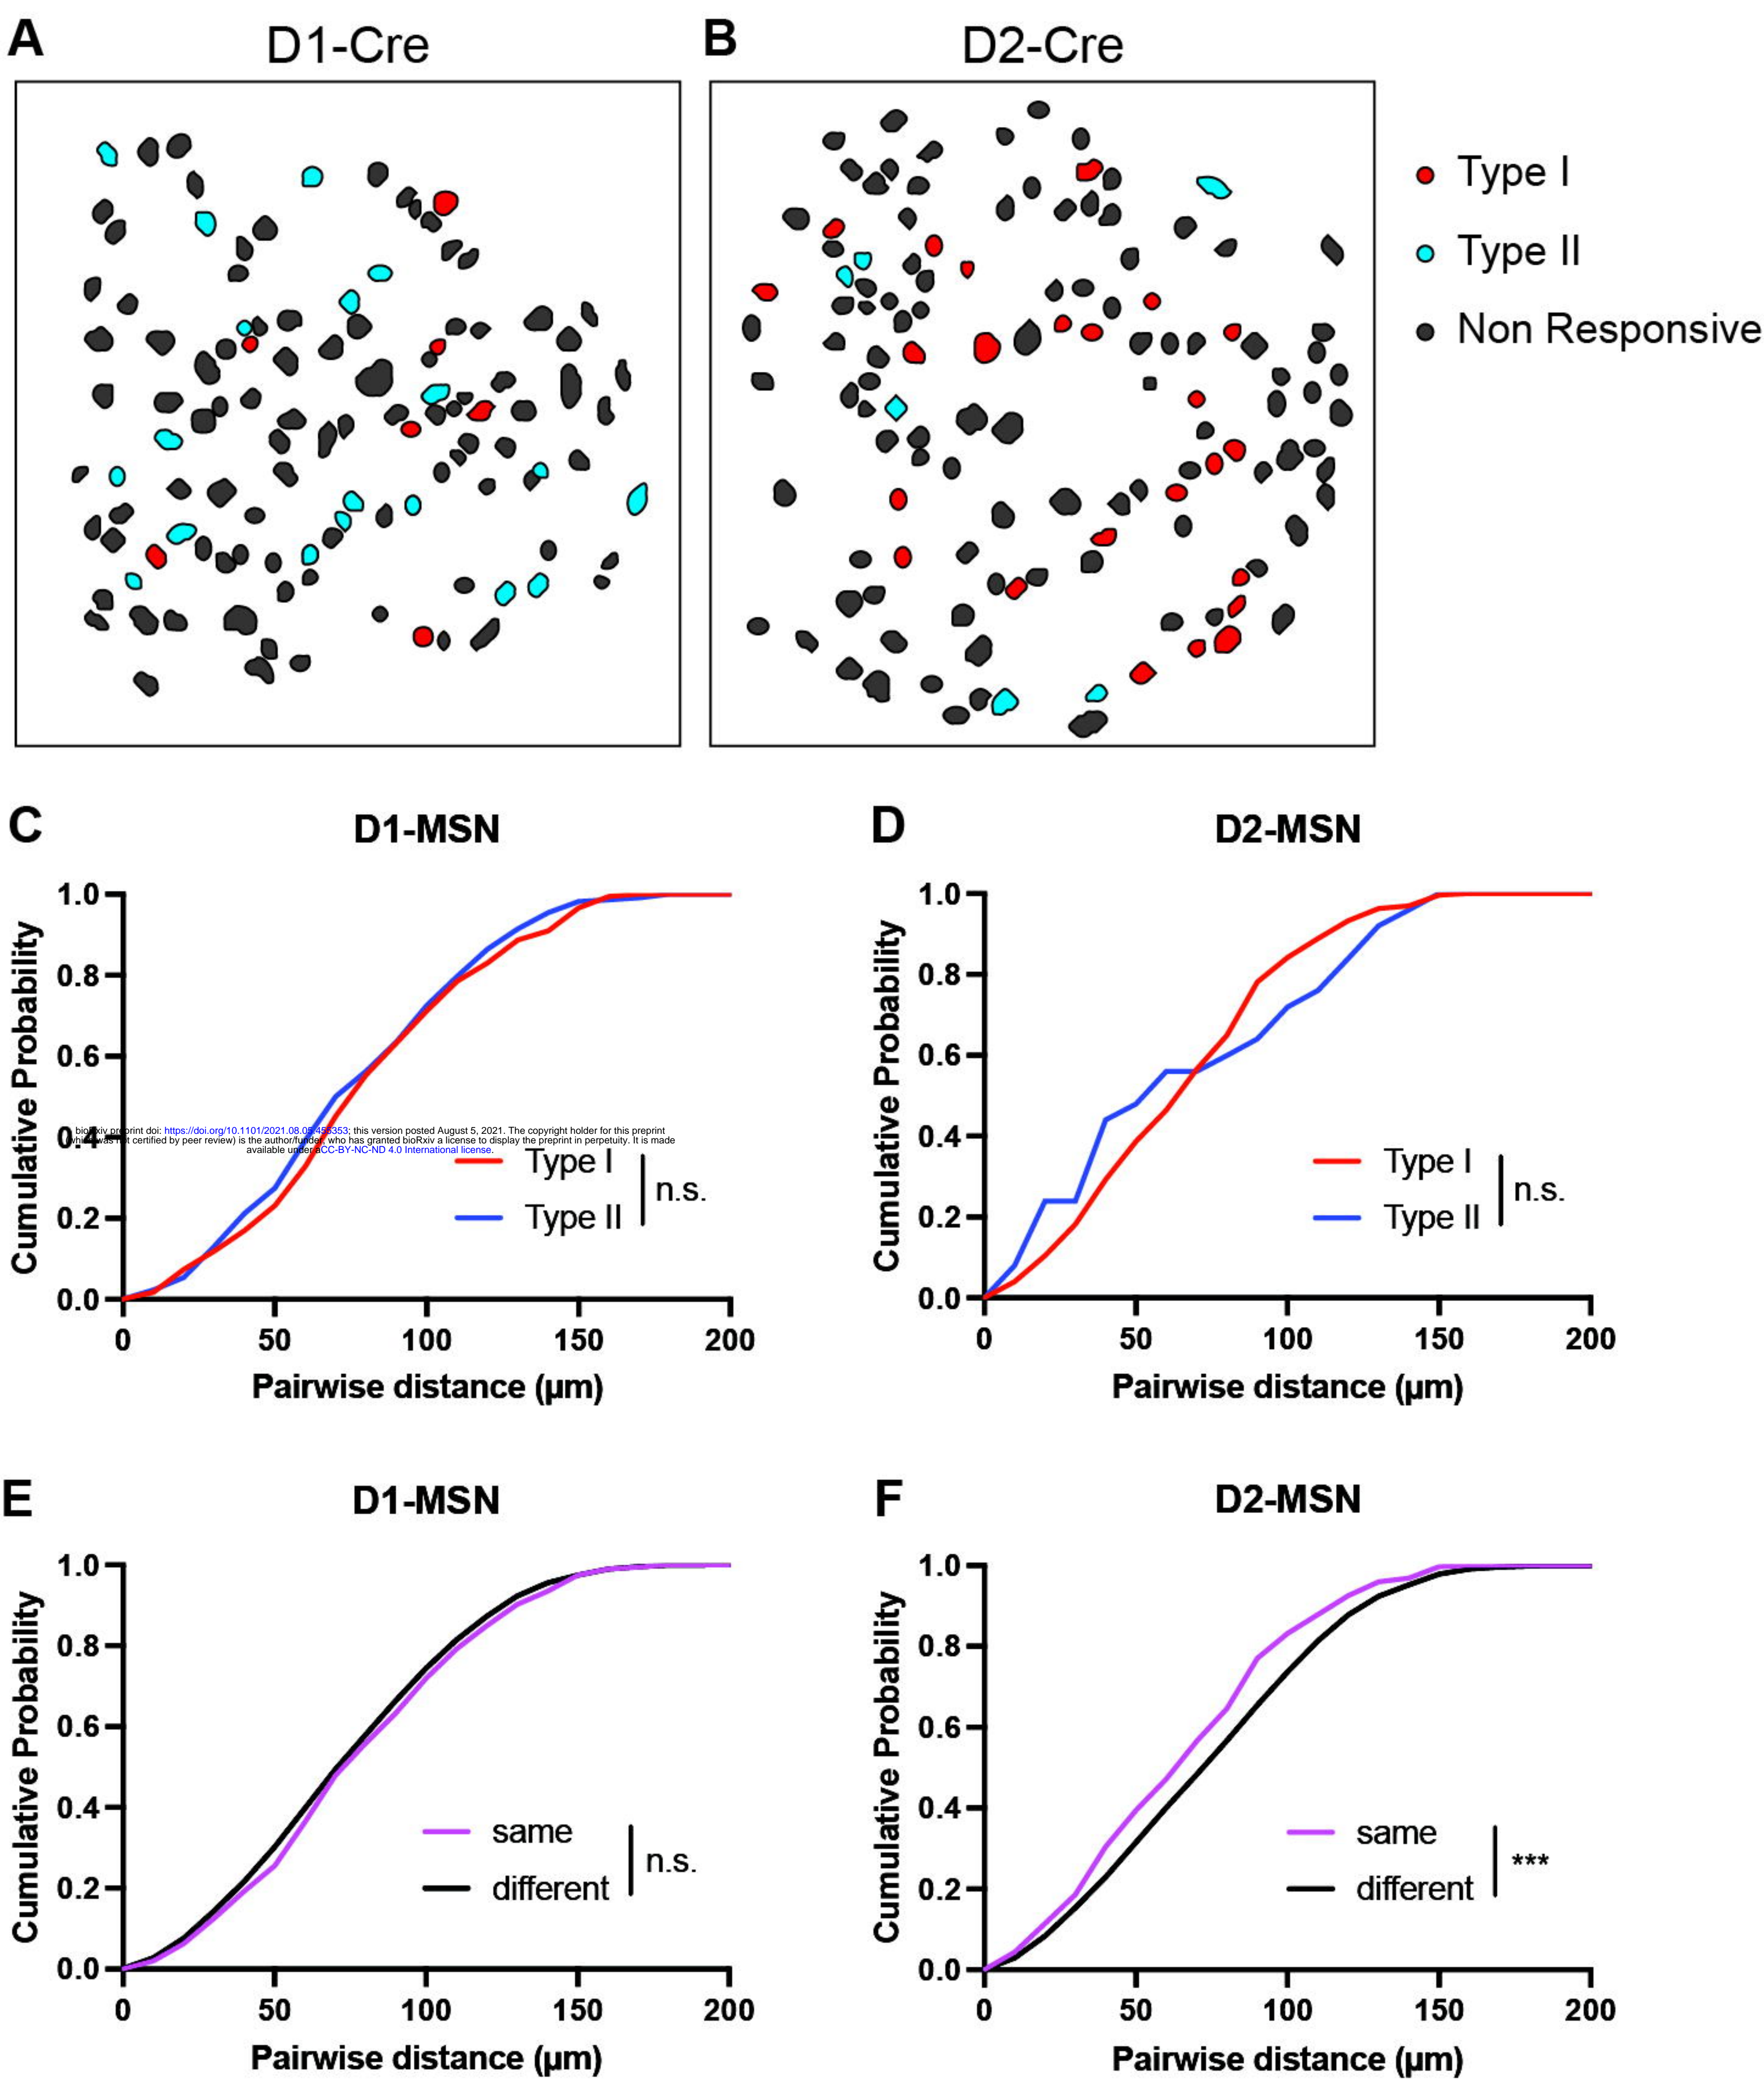

# Supplementary Figure S11 Nishioka et al.

## Performance

bioRxiv preprint doi: <https://doi.org/10.1101/2021.08.05.455353>; this version posted August 5, 2021. The copyright holder for this preprint (which was not certified by peer review) is the author/funder, who has granted bioRxiv a license to display the preprint in perpetuity. It is made available under aCC-BY-NC-ND 4.0 International license.

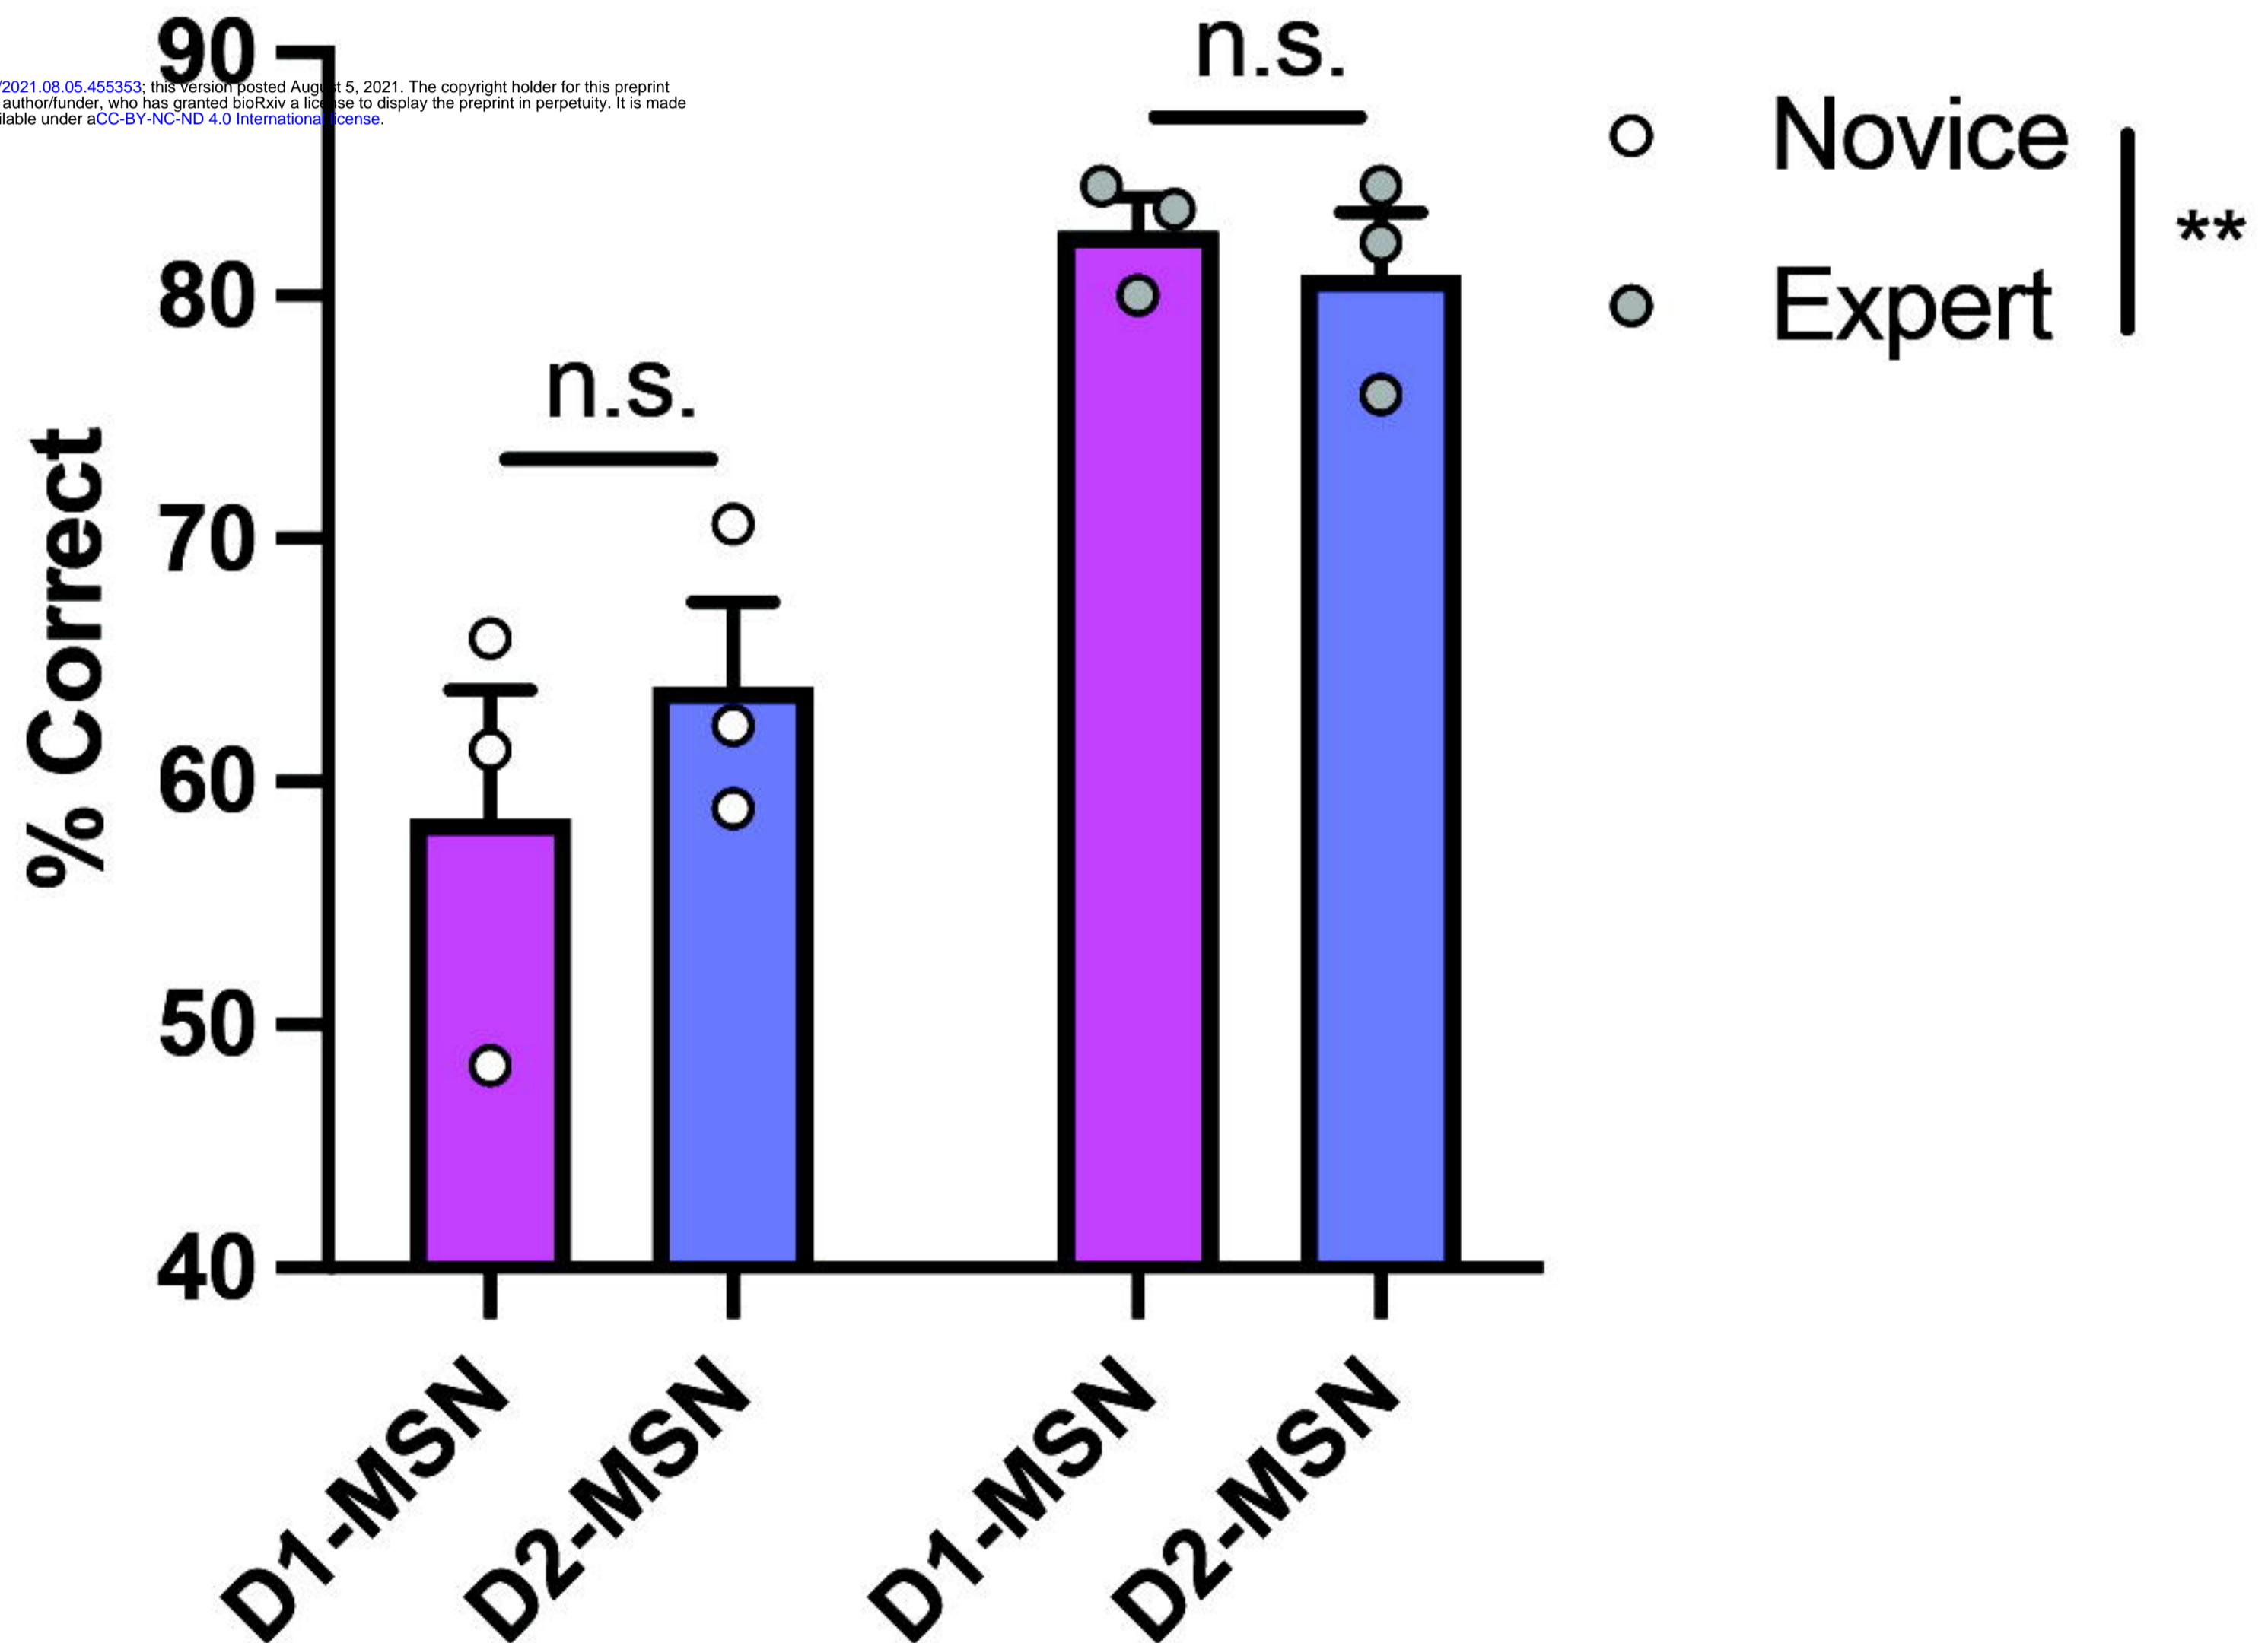

# Supplementary Figure S12 Nishioka et al.

D1-MSN

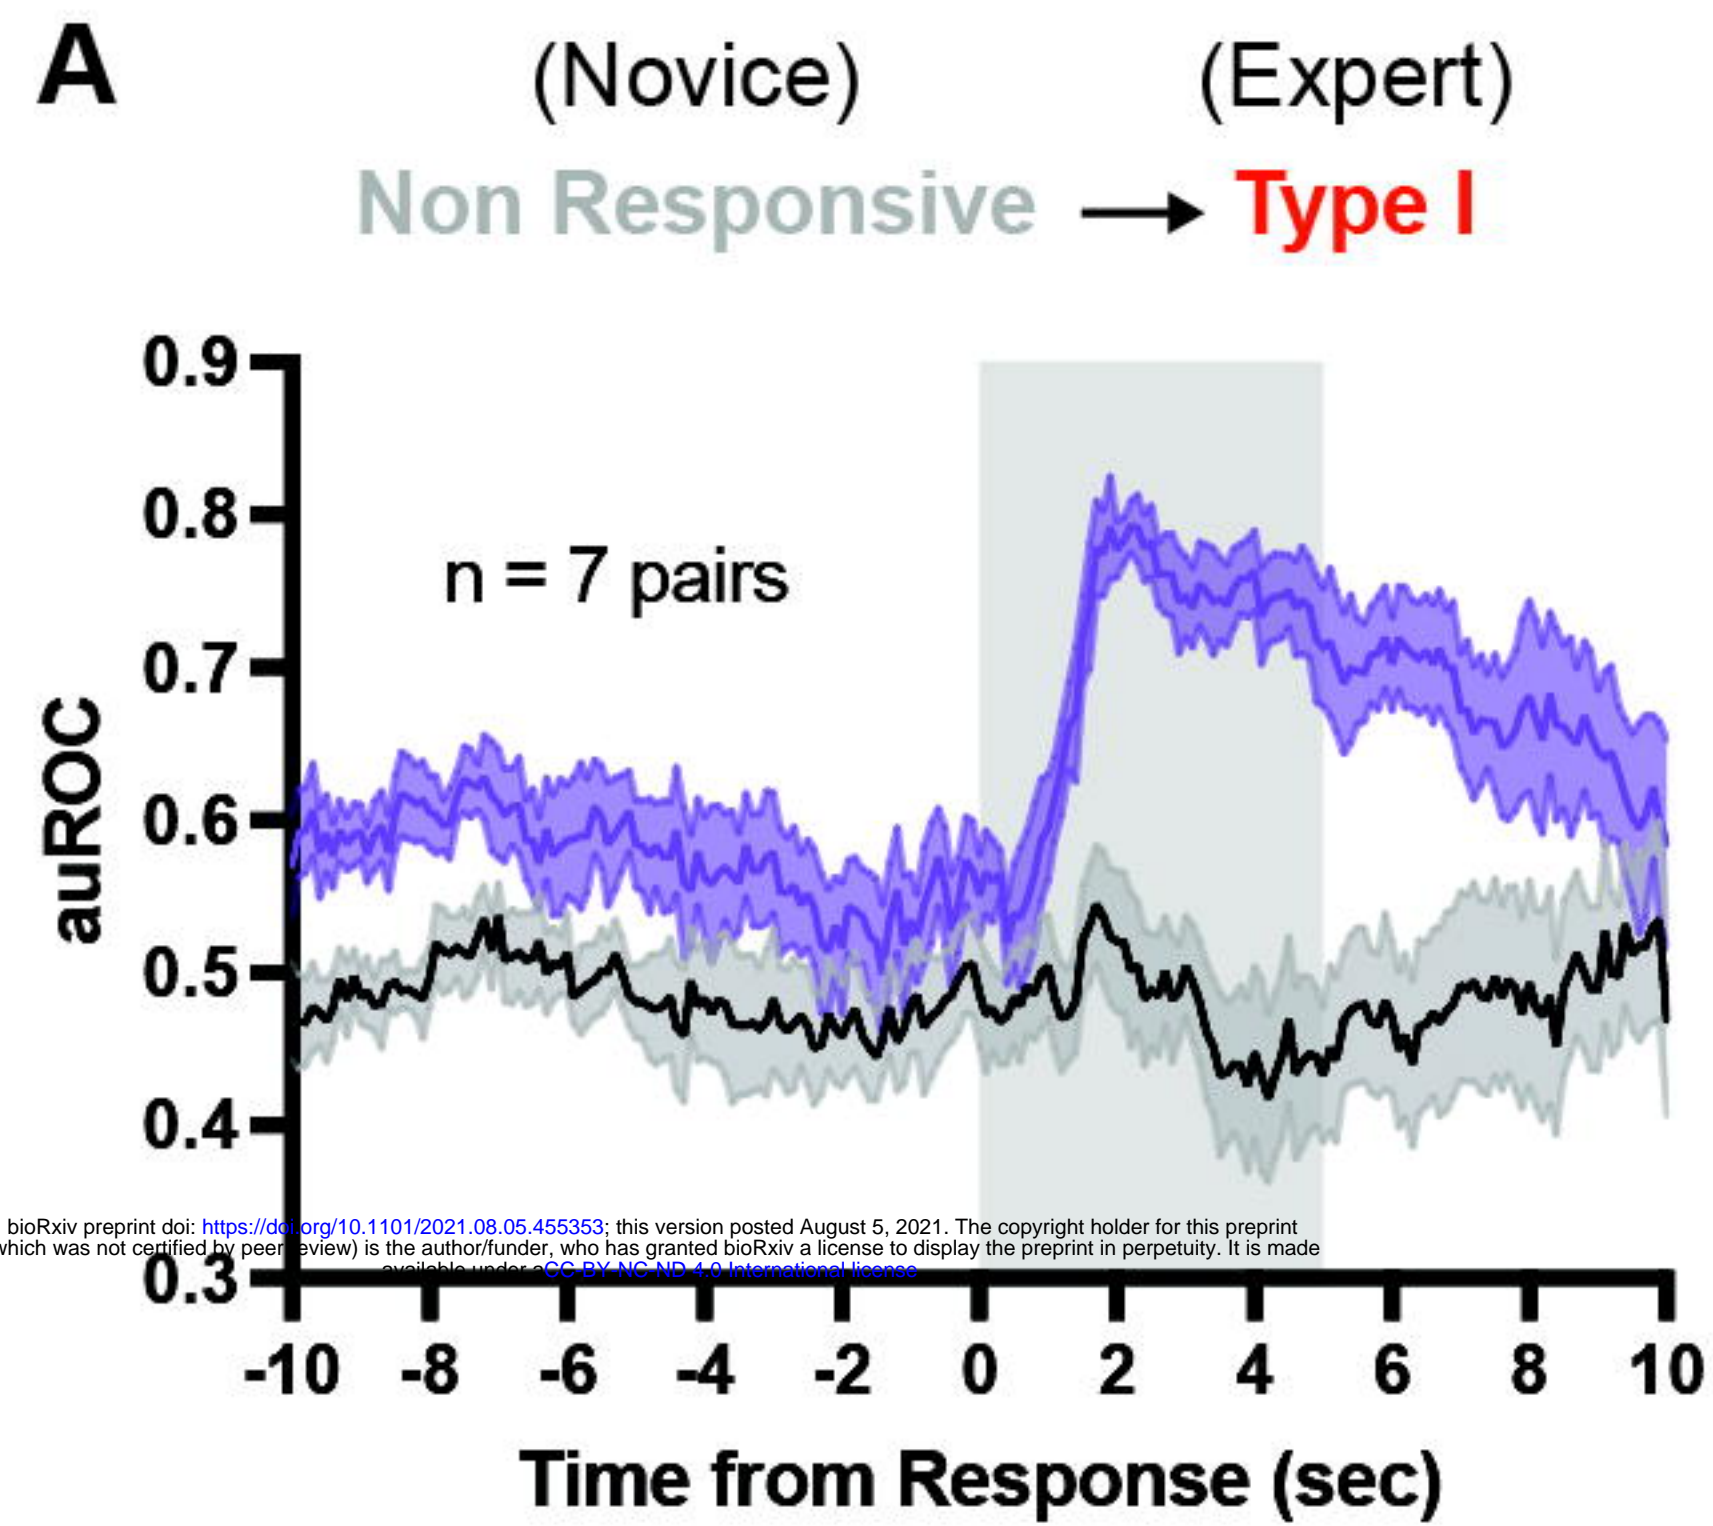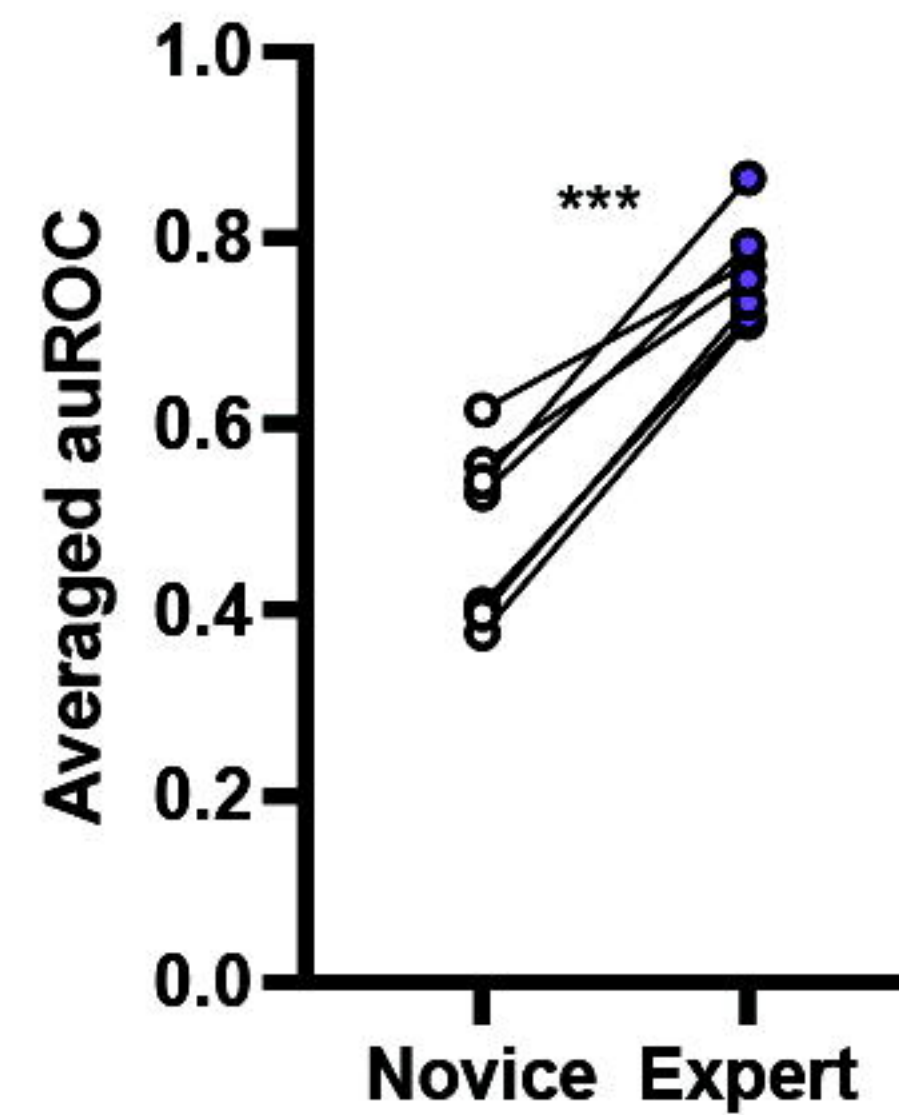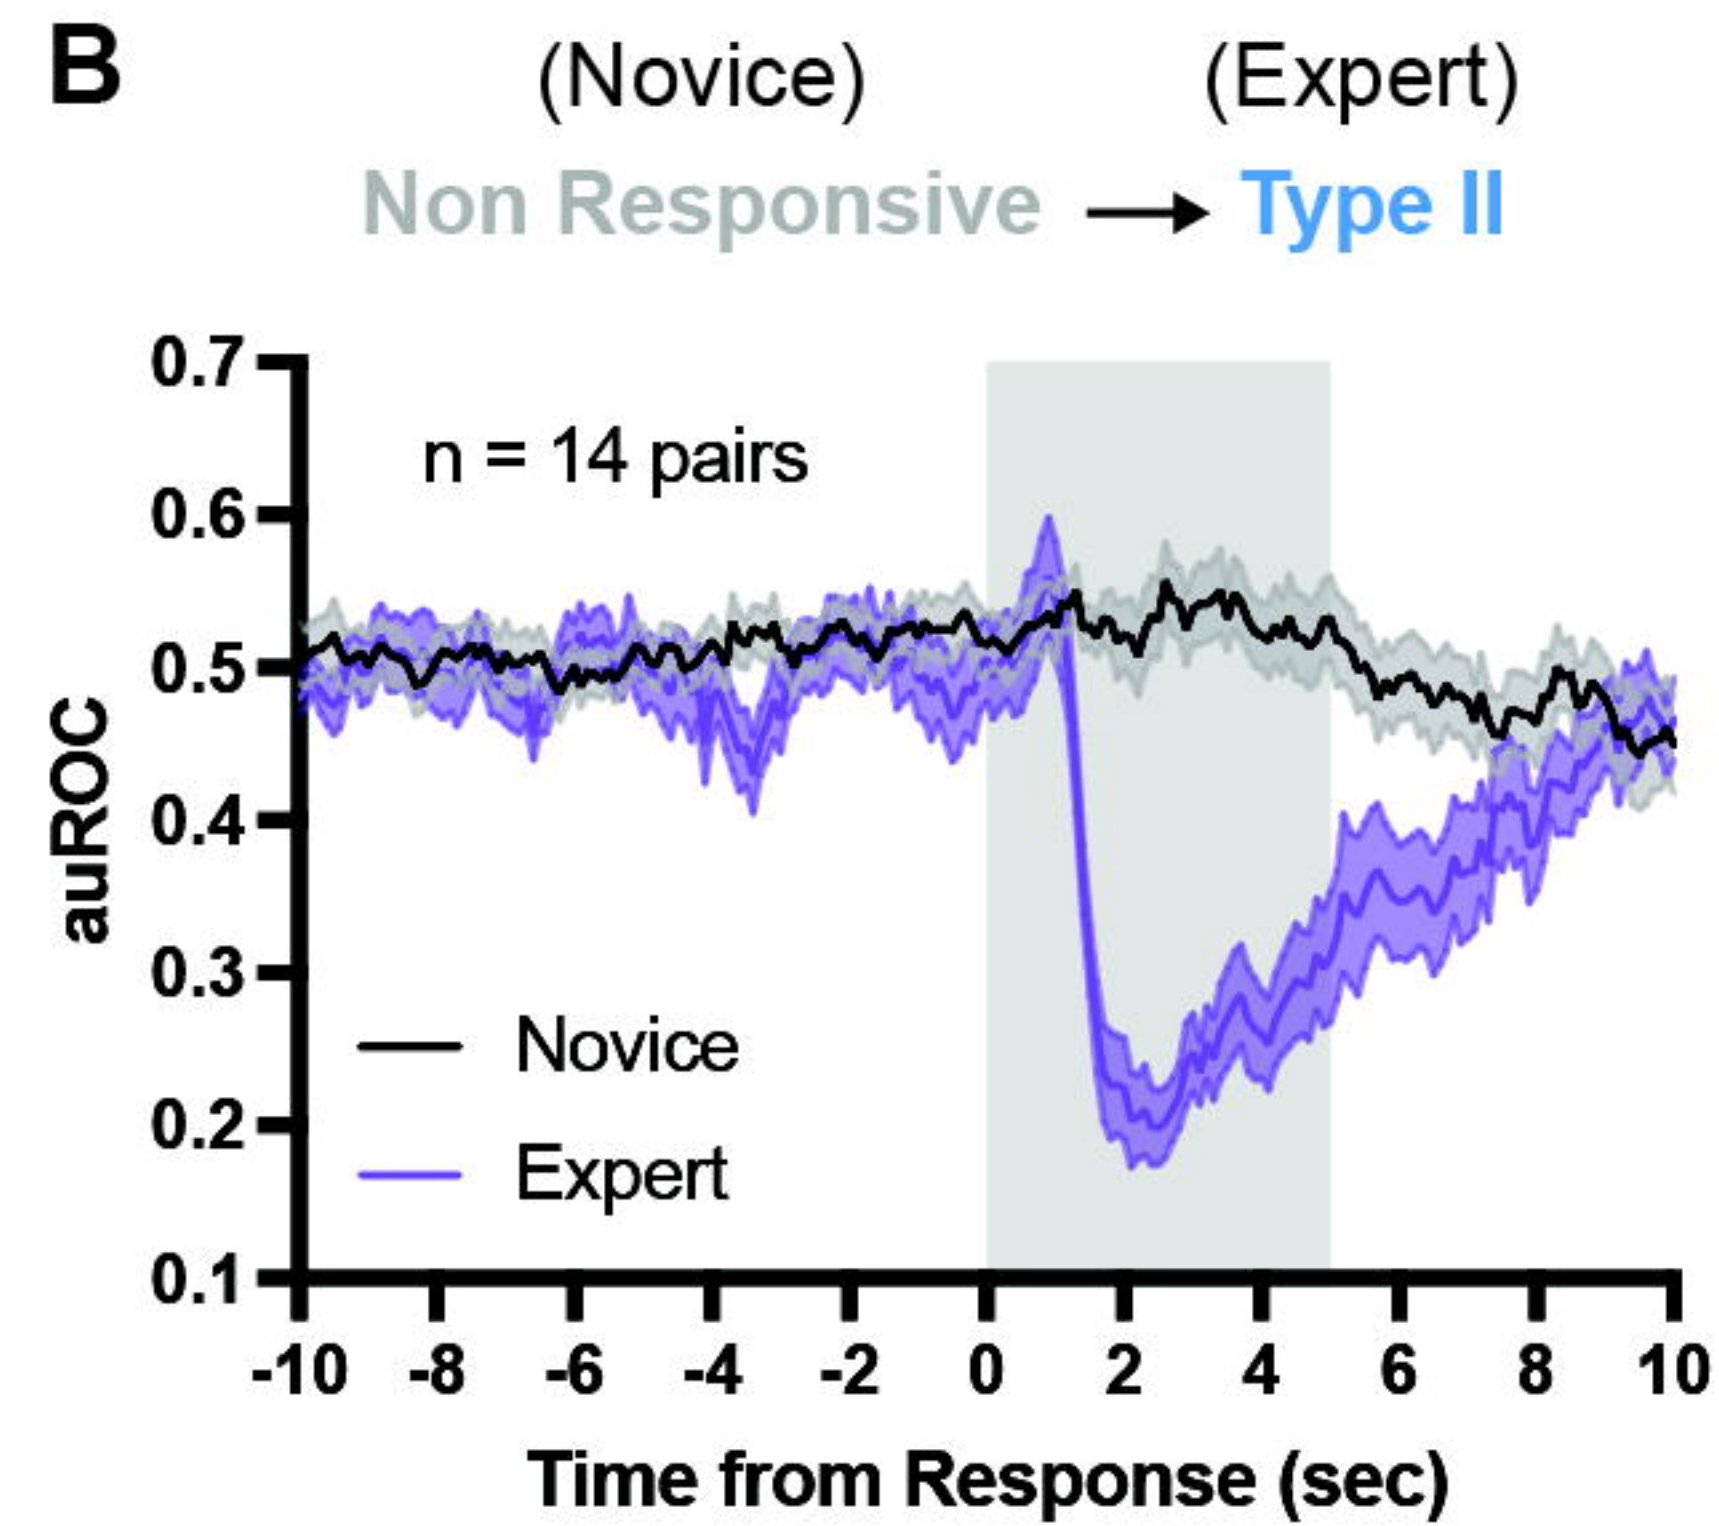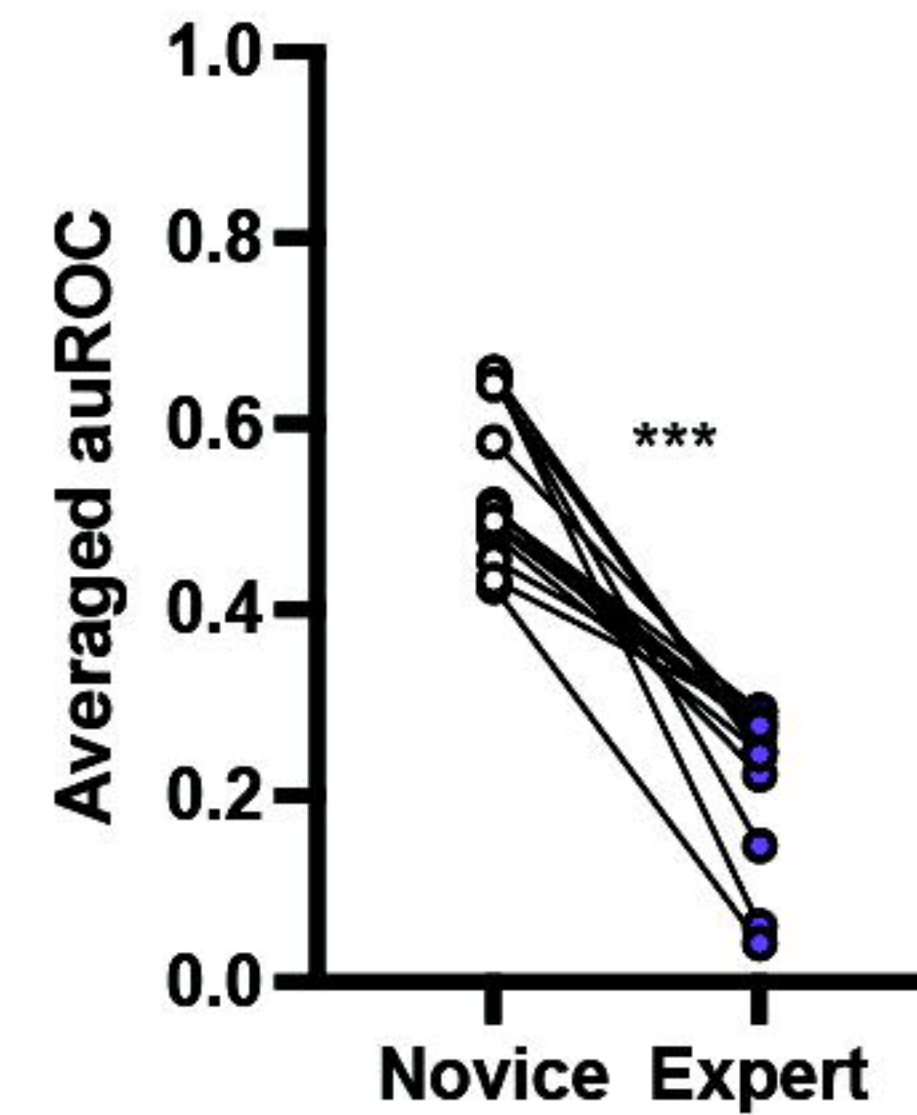

D2-MSN

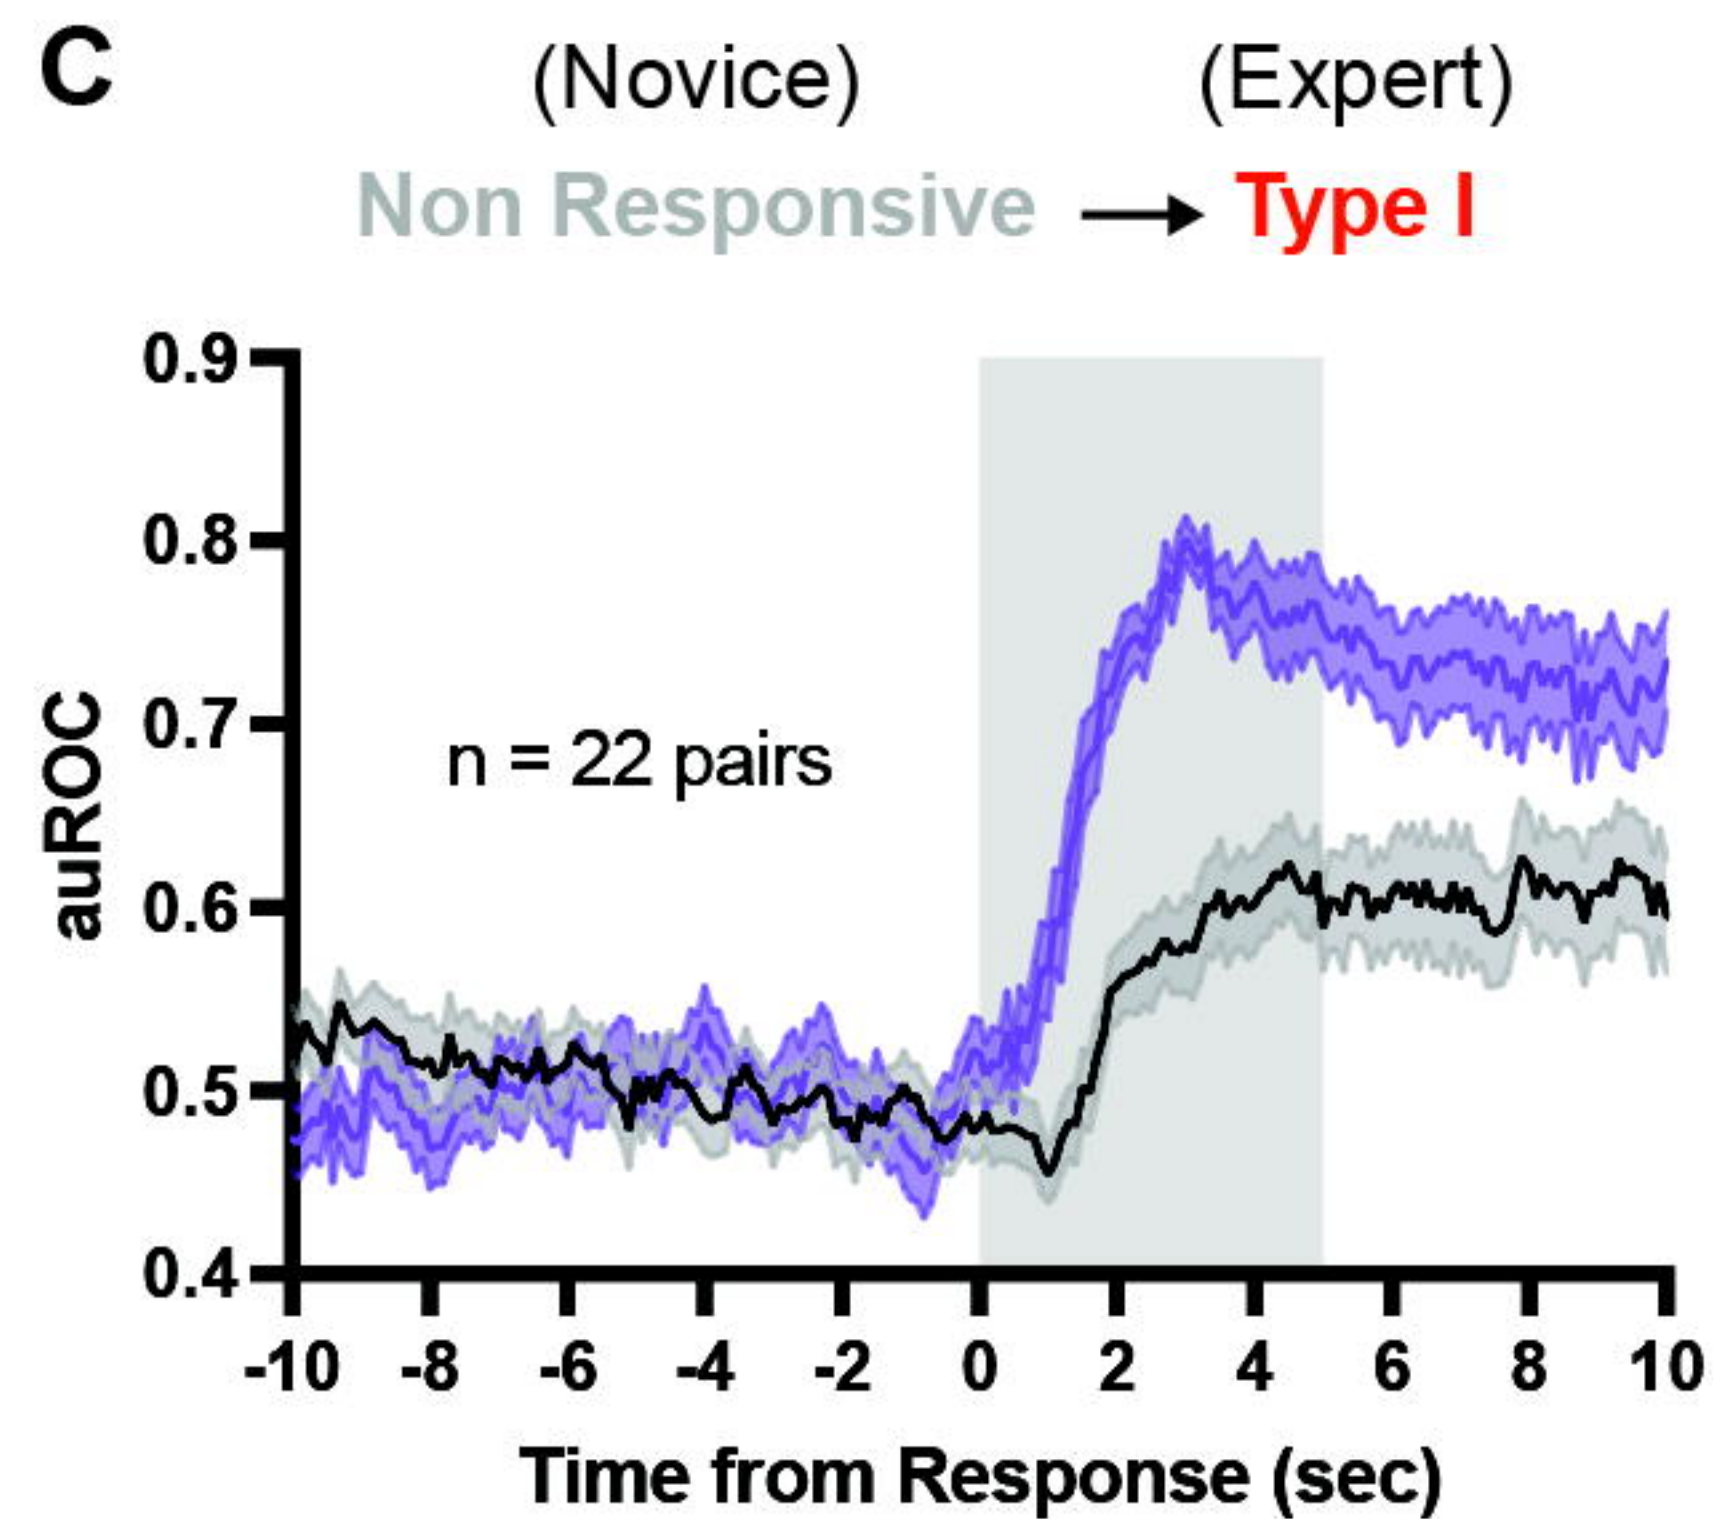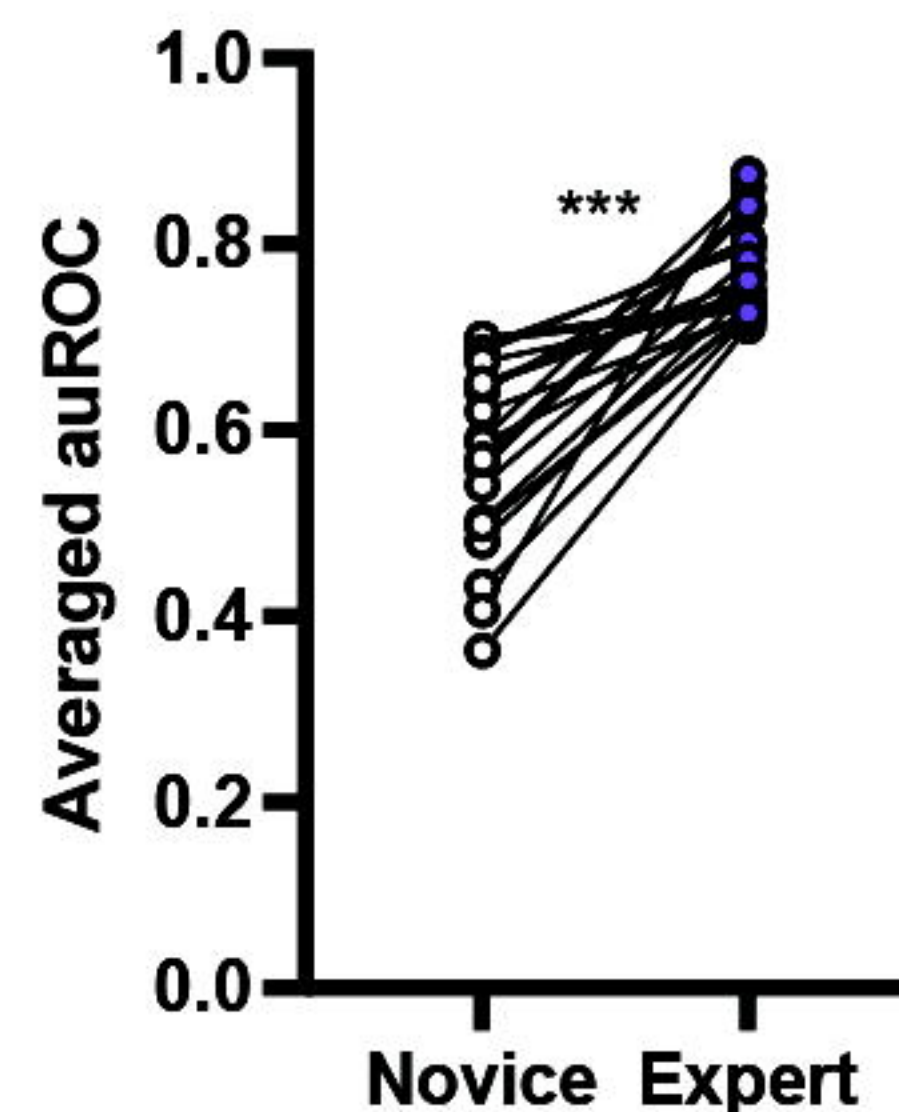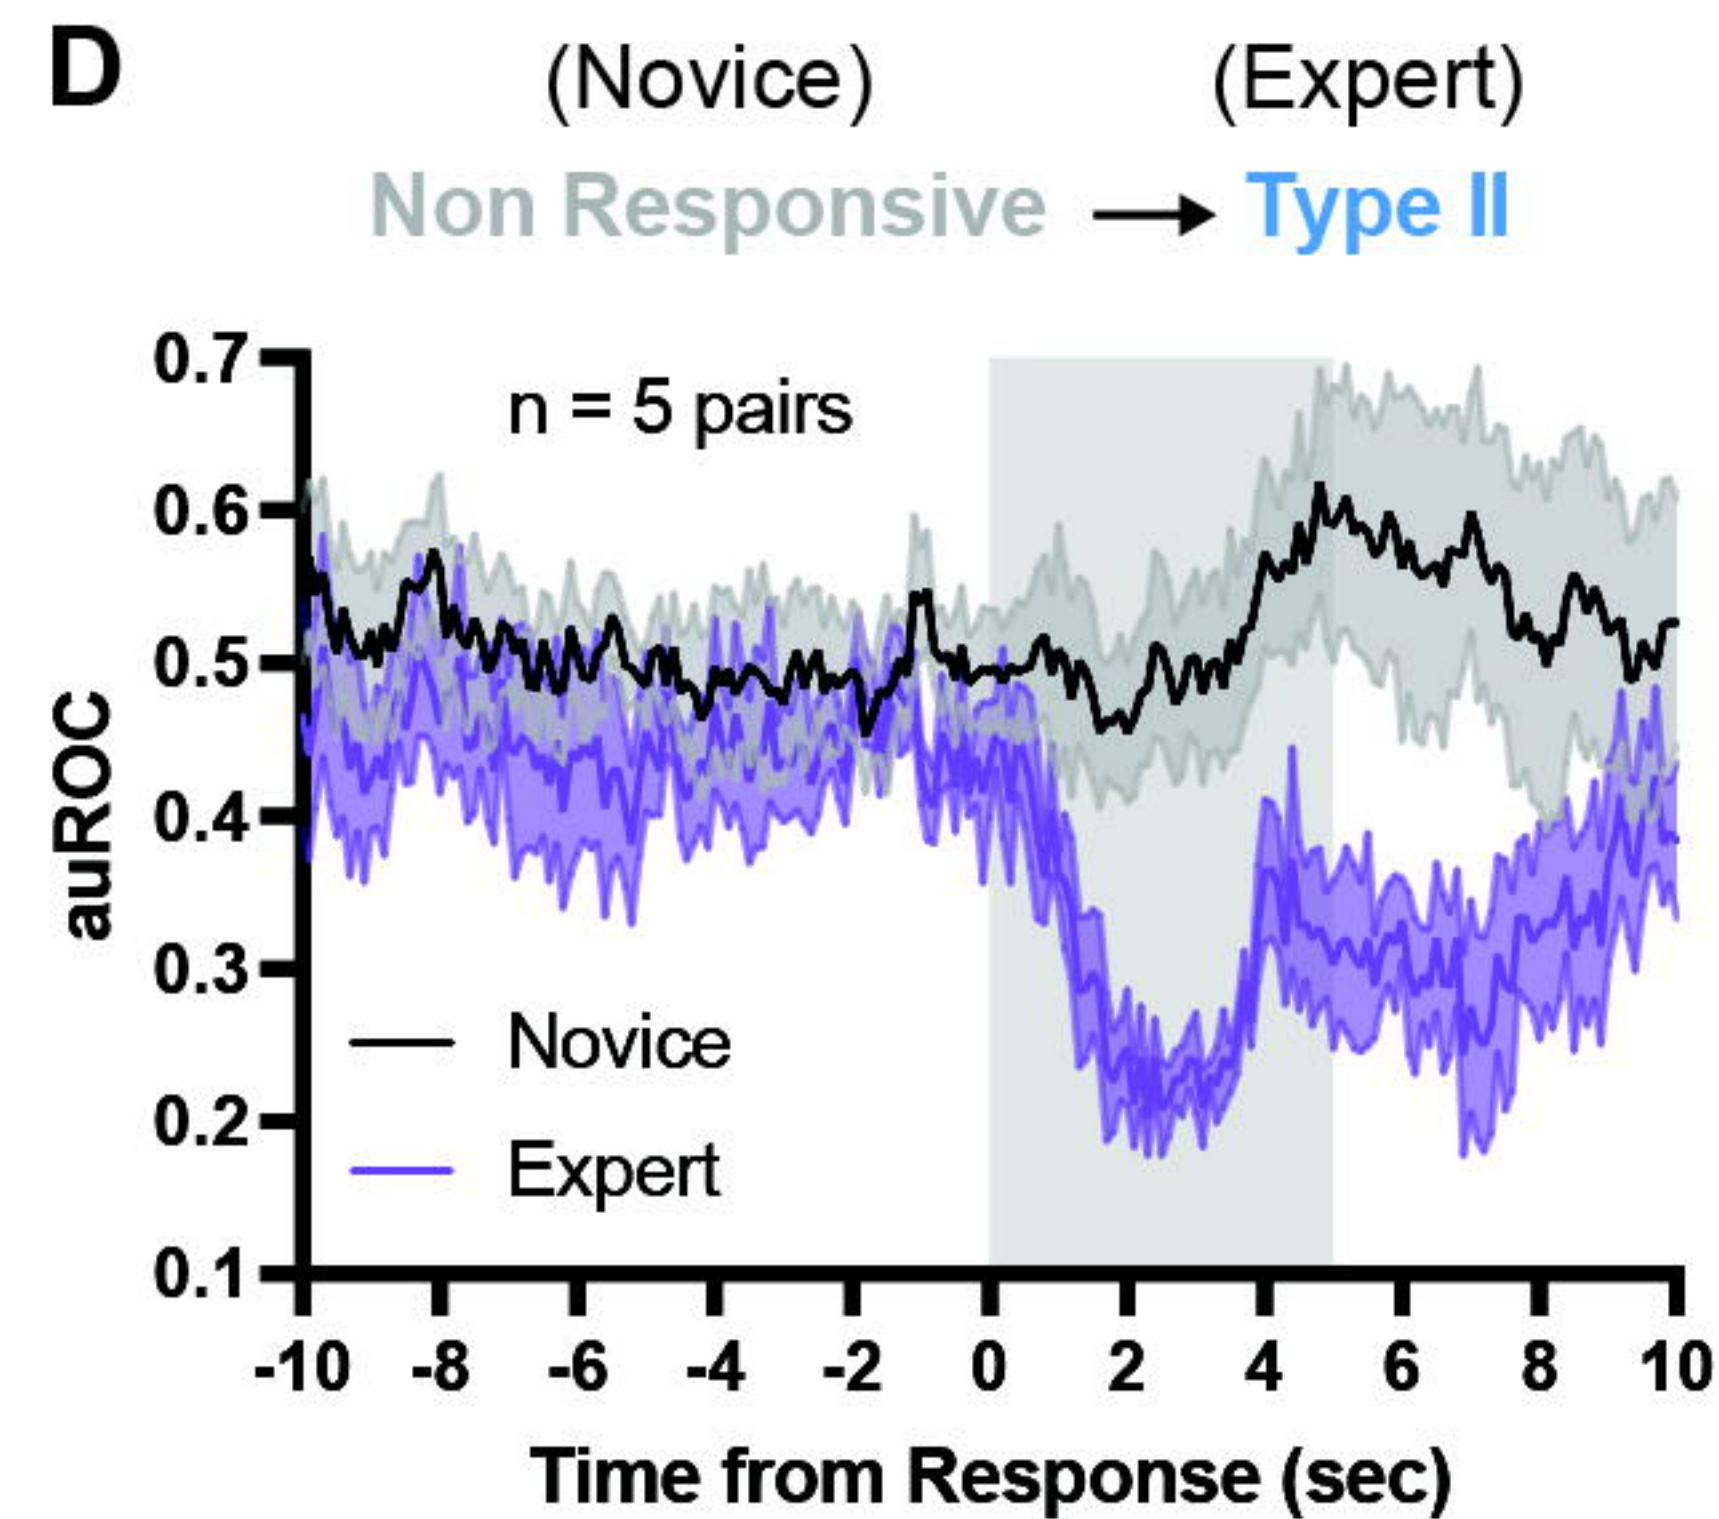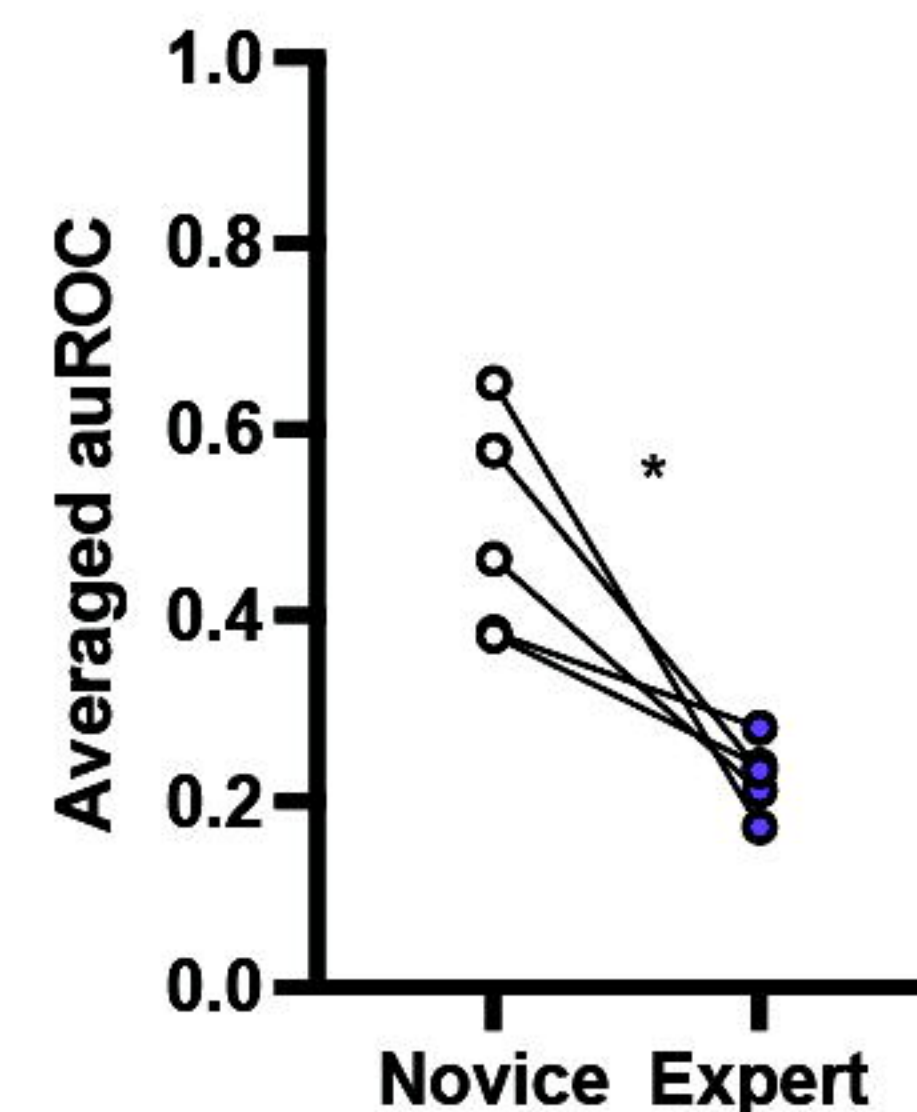

Source: https://biorxiv.org/content/10.1101/2021.08.05.455353v1.full.pdf
